# Supplementary material for: Application of heterocyclic aldehydes as components in Ugi–Smiles couplings
Source: publisher site journal article supplement (doi:10.3762/bjoc.12.191), 2016-09-15
Supplement: Additional file 1 [file 1860-5397-12-191-S1.pdf]

# Supporting Information

for

## Application of heterocyclic aldehydes as components in Ugi–Smiles couplings

Katelynn M. Mason<sup>1</sup>, Michael S. Meyers<sup>1</sup>, Abbie M. Fox<sup>1</sup> and Sarah B. Luesse<sup>1\*</sup>

Address: <sup>1</sup>Department of Chemistry, Southern Illinois University Edwardsville, Edwardsville, Illinois 62026, USA

Email: Sarah Luesse - sluesse@siue.edu

\* Corresponding author

### Experimental procedures and analytical data for Ugi–Smiles and US-IMDA products

#### Table of Contents

|                                                                              |     |
|------------------------------------------------------------------------------|-----|
| 1. General experimental details                                              | S1  |
| 2. Synthesis of Ugi-Smiles adducts <b>1c-4b</b>                              | S2  |
| 3. Stacked <sup>1</sup> H NMRs for reaction monitoring (related to Scheme 2) | S13 |
| 4. <sup>1</sup> H and <sup>13</sup> C NMR spectra of new compounds           | S14 |

#### General experimental details

Methanol was distilled from CaH<sub>2</sub> under N<sub>2</sub> immediately before use. 2-Furaldehyde was distilled under reduced pressure (62 °C, 18 mm). Cyclohex-1-en-1-ylmethyl amine and 1-cyclohex-1-en-1-ylethyl amine were purchased as hydrochloride salts and converted to the free base form via 1.0 M NaOH prior to use. All other reagents and solvents were commercial grade (Aldrich or Acros) and used without purification. Characterization data for compounds **1a-D1**, **1a-D2**, **1b-D1**, and **1b-D2** have been reported previously [1]. Novel Ugi-Smiles and tandem US-IMDA products in this work were prepared in a similar manner to experimental procedures previously reported for known US-IMDA products [1].

---

1. Richey, B.; Mason, K. M.; Meyers, M. S.; Luesse, S. B. *Tetrahedron Lett.* **2016**, *57*, 492-494.

Thin layer chromatography (TLC) was performed using plastic-backed silica gel (225  $\mu\text{m}$ ) plates and flash chromatography utilized 230–400 mesh silica gel from Sigma-Aldrich. Some compounds were purified via automated chromatography on the Biotage Isolera<sup>TM</sup> Flash Purification system using a gradient method with SNAP Ultra cartridges. Products were visualized by UV light, and/or the use of ceric ammonium molybdate, *p*-anisaldehyde, and potassium iodoplatinate solutions.

IR spectra were recorded on a Nicolet<sup>TM</sup> iS5 FT-IR Spectrometer and are reported in wavenumbers ( $\text{cm}^{-1}$ ). Liquids and oils were analyzed as neat films on a NaCl plate (transmission), whereas solids were applied to a diamond plate (ATR). Nuclear magnetic resonance spectra (NMR) were acquired on a Varian Unity Plus (300 MHz) or a Bruker Ascend (400 MHz) Spectrometer and processed with TopSpin 3.2. Chemical shifts are measured relative to residual solvent peaks as an internal standard set to  $\delta$  7.26 and  $\delta$  77.1 ( $\text{CDCl}_3$ ). HRMS FAB data was collected from a JEOL MStation [JMS-700] Mass Spectrometer at the University of Missouri-St Louis. Direct infusion mass spectrometry (DIMS) was used to verify accurate masses for several compounds, using a Triversa Nanomate nanospray direct infusion robot (Advion) attached to a Q-Exactive Mass Spectrometer. These samples were analyzed at the Proteomics & Mass Spectrometry Facility at the Danforth Plant Science Center (St Louis, MO).

### Synthesis of *N*-(*tert*-butyl)-7*a*-methyl-2-(2-nitrophenyl)-1,2,3,6,7,7*a*-hexahydro-3*a*,6-epoxyisoindole-3-carboxamide (**1c**).

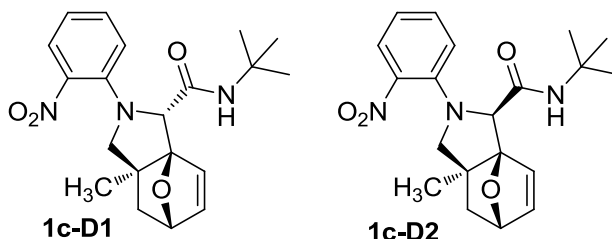

In a similar manner as described in [1], to a solution of 2-nitrophenol (69.6 mg, 0.5 mmol, 1 equiv) in methanol (0.50 mL) was added 2-furaldehyde (41.4  $\mu\text{L}$ , 0.5 mmol, 1 equiv), 2-methylallylamine (45.6  $\mu\text{L}$ , 0.5 mmol, 1 equiv), and *tert*-butyl isocyanide (114  $\mu\text{L}$ , 1.0 mmol, 2 equiv). The reaction mixture was warmed at 50  $^{\circ}\text{C}$  for 30 h. Removal of volatiles gave crude material, which was purified via flash column chromatography on silica gel (10% ethyl acetate in hexanes) to afford epoxyisoindolines **1c-D1** (26.0 mg, 14%) and **1c-D2** (53.9 mg, 29%).

**1c-D1**:  $R_f$  = 0.40 (40:60 EtOAc:Hex);  $^1\text{H}$  NMR (400 MHz,  $\text{CDCl}_3$ )  $\delta$  7.73 (m, 2H), 7.47 (dd,  $J$  = 8.2, 7.6 Hz, 1H), 7.32 (d,  $J$  = 8.5 Hz, 1H), 7.09 (dd,  $J$  = 7.8, 7.7 Hz, 1H), 6.56 (d,  $J$  = 5.9 Hz, 1H), 6.42 (d,  $J$  = 5.8 Hz, 1H), 4.97 (d,  $J$  = 5.0 Hz, 1H), 4.57 (s, 1H), 3.45 (d,  $J$  = 8.5 Hz, 1H), 2.98 (d,  $J$  = 8.2 Hz, 1H), 2.08 (dd,  $J$  = 4.9, 4.4 Hz, 1H), 1.32 (s, 9H), 1.28–1.23 (m, 1H), 1.08 (s, 3H);  $^{13}\text{C}$  NMR (100 MHz,  $\text{CDCl}_3$ )  $\delta$  166.9, 142.3, 139.0, 137.7, 133.6, 132.5, 126.5, 118.9, 116.2, 96.9, 80.7, 65.4, 62.9, 51.4, 49.1, 38.6, 28.5, 22.6; DIMS  $[\text{M}+\text{H}]^+$  calcd for  $\text{C}_{20}\text{H}_{26}\text{N}_3\text{O}_4$  372.1923; found 372.1916.

**1c-D2**:  $R_f$  = 0.29 (40:60 EtOAc:Hex);  $^1\text{H}$  NMR (400 MHz,  $\text{CDCl}_3$ )  $\delta$  7.78 (d,  $J$  = 8.2 Hz, 1H), 7.42 (dd,  $J$  = 8.1, 7.8 Hz, 1H), 7.07 (d,  $J$  = 8.5 Hz, 1H), 6.90 (dd,  $J$  = 7.9, 7.6 Hz, 1H), 6.56 (d,  $J$  = 5.6 Hz, 1H), 6.48 (d,  $J$  = 5.7 Hz, 1H), 6.45 (s, 1H), 5.08 (s, 1H), 4.75 (s, 1H), 3.70 (d,  $J$  = 9.6 Hz, 1H), 2.63 (d,  $J$  = 9.6 Hz, 1H), 2.19 (dd,  $J$  = 4.7, 4.6 Hz, 1H), 1.19 (s, 9H), 1.05 (d,  $J$  = 11.6 Hz, 1H), 0.82 (s, 3H);  $^{13}\text{C}$  NMR ( $\text{CDCl}_3$ )  $\delta$  168.2, 142.1, 135.7, 134.0, 133.1, 125.8, 122.8,

121.9, 98.5, 79.7, 65.1, 65.3, 51.3, 48.6, 39.8, 29.3, 28.6, 23.2; HR-FAB MS  $[M+Na]^+$  calcd for  $C_{20}H_{25}N_3NaO_4$  394.1743; found 394.1746.

**Synthesis of *N*-cyclohexyl-7a-methyl-2-(2-nitrophenyl)-1,2,3,6,7,7a-hexahydro-3a,6-epoxyisindole-3-carboxamide (1d).**

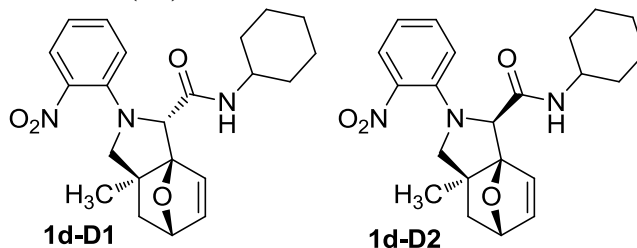

In a similar manner as described in [1], to a solution of 2-nitrophenol (69.8 mg, 0.50 mmol, 1 equiv) in methanol (0.50 mL) was added 2-furaldehyde (41.4  $\mu$ L, 0.5 mmol, 1 equiv), 2-methylallylamine (45.6  $\mu$ L, 0.5 mmol, 1 equiv), and cyclohexyl isocyanide (62.2  $\mu$ L, 0.5 mmol, 1 equiv). The reaction mixture was warmed at 50 °C for 30 h. Removal of volatiles gave crude material, which was purified via flash column chromatography on silica gel (15% ethyl acetate in hexanes) to give epoxyisindolines **1d-D1** (36.9 mg, 19%) and **1d-D2** (67.5 mg, 34%).

**1d-D1:**  $R_f = 0.35$  (50:50 EtOAc:Hex);  $^1H$  NMR (400 MHz,  $CDCl_3$ )  $\delta$  7.84 (d,  $J = 7.8$  Hz, 1H, NH), 7.72 (dd,  $J = 8.1, 1.4$  Hz, 1H), 7.46 (dd,  $J = 7.9, 7.7$  Hz, 1H), 7.31 (d,  $J = 8.2$  Hz, 1H), 7.09 (dd,  $J = 7.3, 7.3$  Hz, 1H), 6.56 (d,  $J = 5.8$  Hz, 1H), 6.43 (dd,  $J = 5.8, 1.6$  Hz, 1H), 4.98 (dd,  $J = 4.6, 1.5$  Hz, 1H), 4.70 (s, 1H), 3.81-3.69 (m, 1H), 3.43 (d,  $J = 8.4$  Hz, 1H), 3.00 (d,  $J = 8.4$  Hz, 1H), 2.08 (dd,  $J = 11.5, 4.8$  Hz, 1H), 1.95-1.87 (m, 1H), 1.74-1.59 (m, 4H), 1.41-1.11 (m, 5H), 1.00 (s, 3H), 0.94-0.79 (m, 1H);  $^{13}C$  NMR (100 MHz,  $CDCl_3$ )  $\delta$  167.8, 141.8, 135.6, 133.9, 132.9, 125.6, 122.8, 121.9, 98.2, 79.6, 65.3, 64.7, 48.6, 48.0, 39.6, 32.9, 32.5, 30.9, 25.3, 24.6(2), 23.0; HR-FAB MS  $[M+Na]^+$  calcd for  $C_{22}H_{27}N_3NaO_4$  420.1899; found 420.1907.

**1d-D2:**  $R_f = 0.18$  (50:50 EtOAc:Hex);  $^1H$  NMR (400 MHz,  $CDCl_3$ )  $\delta$  7.78 (d,  $J = 8.2$  Hz, 1H), 7.42 (dd,  $J = 7.8, 7.8$  Hz, 1H), 7.07 (d,  $J = 8.4$  Hz, 1H), 6.90 (dd,  $J = 7.4, 7.4$  Hz, 1H), 6.59 (d,  $J = 5.7$  Hz, 1H), 6.54 (s, 1H), 6.50 (d,  $J = 5.7$  Hz, 1H), 5.08 (s, 1H), 4.87 (s, 1H), 3.73-3.70 (m, 2H), 2.65 (d,  $J = 9.6$  Hz, 1H), 2.23-2.14 (m, 1H), 1.85-1.76 (m, 1H), 1.65-1.49 (m, 2H), 1.49-1.35 (m, 2H), 1.35-1.00 (m, 5H), 0.94-0.78 (m, 4H);  $^{13}C$  NMR (100 MHz,  $CDCl_3$ )  $\delta$  166.6, 142.2, 139.0, 137.8, 133.6, 132.4, 126.5, 118.9, 116.2, 96.9, 80.7, 65.3, 62.6, 49.0, 47.8, 38.6, 32.5, 32.5, 25.5, 24.3, 24.2, 22.5; HR-FAB MS  $[M+Na]^+$  calcd for  $C_{22}H_{27}N_3NaO_4$  420.1899; found 420.1907.

**Synthesis of 2-(but-3-en-1-yl(2-nitrophenyl)amino)-*N*-(*tert*-butyl)-2-(furan-2-yl)acetamide (2a).**

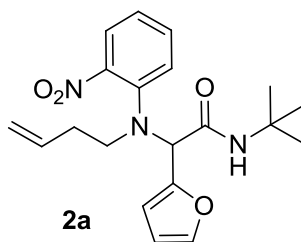

In a similar manner as described in [1], to a solution of 2-nitrophenol (69.6 mg, 0.5 mmol, 1 equiv) in methanol (0.50 mL) was added 2-furaldehyde (41.4  $\mu$ L, 0.5 mmol, 1 equiv), 3-

butenylamine (45.8  $\mu\text{L}$ , 0.5 mmol, 1 equiv), and *tert*-butyl isocyanide (114  $\mu\text{L}$ , 1.0 mmol, 2 equiv). The reaction mixture was warmed at 50  $^{\circ}\text{C}$  for 30 h. Removal of volatiles gave crude material, which was purified via flash column chromatography on silica gel (10% ethyl acetate/hexanes) to afford *N*-arylamide **2a** (71.1 mg, 40%).  $R_f = 0.20$  (20:80 EtOAc:Hex);  $^1\text{H}$  NMR (400 MHz,  $\text{CDCl}_3$ )  $\delta$  7.73 (d,  $J = 8.1$  Hz, 1H), 7.49 (dd,  $J = 7.8, 7.7$  Hz, 1H), 7.40 (s, 1H), 7.34 (br s, 1H, NH), 7.25-7.18 (m, 2H), 6.36-6.28 (m, 2H), 5.69-5.52 (m, 1H), 4.97-4.82 (m, 3H), 3.03 (dd,  $J = 7.7, 7.0$  Hz, 2H), 2.06-1.82 (m, 2H), 1.38 (s, 9H);  $^{13}\text{C}$  NMR (100 MHz,  $\text{CDCl}_3$ )  $\delta$  167.3, 149.4, 147.5, 142.8, 142.1, 135.0, 133.0, 126.9, 125.4, 125.1, 117.2, 111.4, 110.5, 66.6, 51.4, 50.8, 32.0, 28.7; HR-FAB MS  $[\text{M}+\text{Na}]^+$  calcd for  $\text{C}_{20}\text{H}_{25}\text{N}_3\text{NaO}_4$  394.1743; found 394.1748.

**Synthesis of 2-(but-3-en-1-yl(2-nitrophenyl)amino)-*N*-cyclohexyl-2-(furan-2-yl)acetamide (2b).**

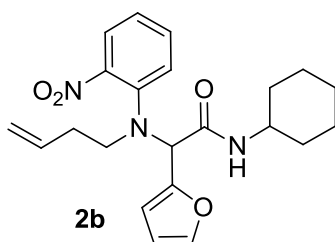

In a similar manner as described in [1], to a solution of 2-nitrophenol (69.6 mg, 0.5 mmol, 1 equiv) in methanol (0.50 mL) was added 2-furaldehyde (41.5  $\mu\text{L}$ , 0.5 mmol, 1 equiv), 3-butenylamine (45.8  $\mu\text{L}$ , 0.5 mmol, 1 equiv), and cyclohexyl isocyanide (62.2  $\mu\text{L}$ , 0.5 mmol, 1 equiv). The reaction mixture was warmed at 50  $^{\circ}\text{C}$  for 30 h. Removal of volatiles gave crude material, which was purified via flash column chromatography on silica gel (20% ethyl acetate in hexanes) to afford *N*-arylamide **2b** (68.2 mg, 34%).  $R_f = 0.51$  (50:50 EtOAc:Hex);  $^1\text{H}$  NMR (400 MHz,  $\text{CDCl}_3$ )  $\delta$  7.70 (d,  $J = 6.9$  Hz, 1H), 7.50-7.41 (m, 2H), 7.36 (s, 1H), 7.28 (d,  $J = 7.3$  Hz, 1H), 7.22 (dd,  $J = 7.4, 7.3$  Hz, 1H), 6.32 (s, 2H), 5.59-5.48 (m, 1H), 5.02 (s, 1H), 4.92 (d,  $J = 10.1$  Hz, 1H), 4.84 (d,  $J = 16.1$  Hz, 1H), 3.80-3.73 (m, 1H), 3.06-2.93 (m, 2H), 1.96-1.84 (m, 3H), 1.80-1.67 (m, 3H), 1.59 (d,  $J = 12.5$  Hz, 1H), 1.40-1.11 (m, 5H);  $^{13}\text{C}$  NMR (100 MHz,  $\text{CDCl}_3$ )  $\delta$  167.0, 149.1, 147.2, 142.6, 142.0, 134.7, 132.9, 126.6, 125.1, 124.9, 117.1, 111.2, 110.4, 65.7, 50.7, 48.3, 32.9, 32.5, 31.7, 25.4, 24.74, 24.67; HR-FAB MS  $[\text{M}+\text{H}]^+$  calcd for  $\text{C}_{22}\text{H}_{28}\text{N}_3\text{O}_4$  398.2080; found 398.2068.

**Synthesis of (E)-N-cyclohexyl-2-((3,7-dimethylocta-2,6-dien-1-yl)(2-nitrophenyl)amino)-2-(furan-2-yl)acetamide (2c).**

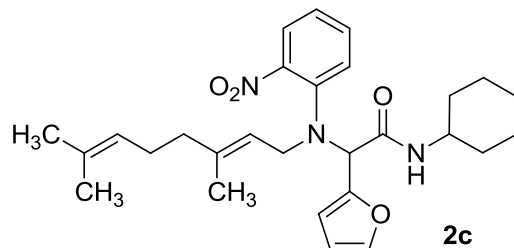

In a similar manner as described in [1], to a solution of 2-nitrophenol (69.6 mg, 0.5 mmol, 1 equiv) in methanol (0.50 mL) was added 2-furaldehyde (41.5  $\mu$ L, 0.5 mmol, 1 equiv), geranylamine (92.4  $\mu$ L, 0.5 mmol, 1 equiv), and cyclohexyl isocyanide (62.2  $\mu$ L, 0.5 mmol, 1 equiv). The reaction mixture was warmed at 50 °C for 30 h. Removal of volatiles gave crude material, which was purified via flash column on silica gel (40% ethyl acetate in hexanes) to afford *N*-arylamide **2c** (83.2 mg, 35%).  $R_f = 0.16$  (40:60 EtOAc:Hex);  $^1\text{H NMR}$  (400 MHz,  $\text{CDCl}_3$ )  $\delta$  7.66 (d,  $J = 8.0$  Hz, 1H), 7.51 (d,  $J = 8.2$  Hz, 1H), 7.44 (dd,  $J = 8.2, 8.1$  Hz, 1H), 7.35-7.31 (m, 2H), 7.17 (dd,  $J = 7.3, 7.2$  Hz, 1H), 6.40 (d,  $J = 2.9$  Hz, 1H), 6.30 (d,  $J = 3.0$  Hz, 1H), 5.06 (s, 1H), 4.95 (dd,  $J = 6.9, 6.8$  Hz, 1H), 4.87 (dd,  $J = 6.8, 6.7$  Hz, 1H), 3.73-3.66 (m, 1H), 3.55 (dd,  $J = 14.9, 7.6$  Hz, 1H), 3.44 (dd,  $J = 14.8, 6.8$  Hz, 1H), 1.91-1.84 (m, 5H), 1.72-1.51 (m, 10H), 1.37-1.13 (m, 7H), 1.12-1.01 (m, 1H);  $^{13}\text{C NMR}$  (100 MHz,  $\text{CDCl}_3$ )  $\delta$  167.3, 149.6, 147.0, 142.7, 142.5, 141.3, 132.8, 131.7, 126.6, 124.74, 124.73, 123.9, 117.9, 110.9, 110.6, 64.8, 50.2, 48.2, 39.7, 32.8, 32.6, 26.3, 25.7, 25.5, 24.8, 24.7, 17.7, 15.9; HR-FAB MS  $[\text{M}+\text{Na}]^+$  calcd for  $\text{C}_{28}\text{H}_{37}\text{N}_3\text{NaO}_4$  502.2682; found 502.2684.

**Synthesis of 2-((2-(cyclohex-1-en-1-yl)ethyl)(2-nitrophenyl)amino)-N-cyclohexyl-2-(furan-2-yl)acetamide (2d).**

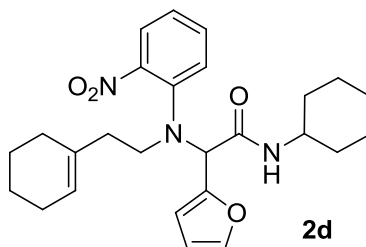

In a similar manner as described in [1], to a solution of 2-nitrophenol (69.6 mg, 0.5 mmol, 1 equiv) in methanol (0.50 mL) was added 2-furaldehyde (41.5  $\mu$ L, 0.5 mmol, 1 equiv), 2-(1-cyclohexenyl)ethylamine (69.7  $\mu$ L, 0.5 mmol, 1 equiv), and cyclohexyl isocyanide (62.2  $\mu$ L, 0.5 mmol, 1 equiv). The reaction mixture was warmed at 50 °C for 30 h. Removal of volatiles gave crude material, which was purified via flash column chromatography on silica gel (40% ethyl acetate in hexanes) to afford *N*-arylamide **2d** (85.8 mg, 35%).  $R_f = 0.13$  (40:60 EtOAc:Hex);  $^1\text{H NMR}$  (400 MHz,  $\text{CDCl}_3$ )  $\delta$  7.69 (d,  $J = 8.1$  Hz, 1H), 7.49-7.45 (m, 2H), 7.37 (s, 1H), 7.33 (d,  $J = 7.7$  Hz, 1H), 7.19 (dd,  $J = 7.3, 7.3$  Hz, 1H), 6.38 (d,  $J = 2.5$  Hz, 1H), 6.35-6.31 (m, 1H), 5.16 (s, 1H), 5.09 (s, 1H), 3.78-3.70 (m, 1H), 3.04-2.88 (m, 2H), 1.95-1.88 (m, 1H), 1.86-1.80 (m, 2H), 1.77-1.56 (m, 8H), 1.45-1.37 (m, 4H), 1.33-1.06 (m, 5H);  $^{13}\text{C NMR}$  (100 MHz,  $\text{CDCl}_3$ )  $\delta$  167.3, 149.3, 146.6, 142.7, 142.5, 134.3, 133.0, 126.4, 125.0, 124.7, 123.4, 111.3, 110.6, 65.2, 50.4, 48.3, 35.9, 32.9, 32.6, 28.1, 25.5, 25.2, 24.8, 24.7, 22.8, 22.2; HR-FAB MS  $[\text{M}+\text{H}]^+$  calcd for  $\text{C}_{26}\text{H}_{34}\text{N}_3\text{O}_4$  452.2544; found 452.2560.

**Synthesis of 2-((cyclohex-1-en-1-ylmethyl)(2-nitrophenyl)amino)-N-cyclohexyl-2-(furan-2-yl)acetamide (2e).**

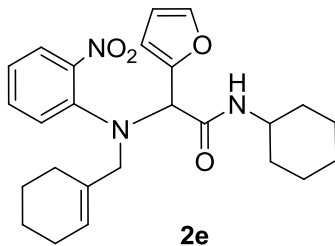

Cyclohex-1-en-1-ylmethyl amine hydrochloride (95.3 mg) was treated with aqueous NaOH (1.0 M, 1 equiv), extracted with diethyl ether, and concentrated *in vacuo* to afford the free cyclohex-1-en-1-ylmethyl amine (74.0 mg). In a similar manner as described in [1], to a solution of 2-nitrophenol (93.2 mg, 0.67 mmol, 1 equiv) in methanol (0.67 mL) was added 2-furaldehyde (55.5  $\mu$ L, 0.67 mmol, 1 equiv), cyclohex-1-en-1-ylmethyl amine (74.0 mg, 0.67 mmol, 1 equiv), and cyclohexyl isocyanide (83.5  $\mu$ L, 0.67 mmol, 1 equiv). The reaction mixture was warmed at 50 °C for 30 h. Removal of volatiles gave crude material, which was purified via flash column chromatography on silica gel (20% ethyl acetate in hexanes) to afford *N*-arylamide **2e** (105.1 mg, 36%).  $R_f = 0.55$  (50:50 EtOAc:Hex);  $^1\text{H NMR}$  (400 MHz,  $\text{CDCl}_3$ )  $\delta$  7.73 (d,  $J = 6.9$  Hz, 1H), 7.52 (d,  $J = 8.1$  Hz, 1H), 7.46 (dd,  $J = 8.4, 8.4$  Hz, 1H), 7.37-7.33 (m, 2H), 7.13 (dd,  $J = 7.3, 7.3$  Hz, 1H), 6.40 (d,  $J = 2.9$  Hz, 1H), 6.34-6.31 (m, 1H), 5.28 (s, 1H), 5.16 (s, 1H), 3.81-3.73 (m, 1H), 3.50 (d,  $J = 14.2$  Hz, 1H), 3.44 (d,  $J = 14.2$  Hz, 1H), 1.97-1.90 (m, 1H), 1.78-1.58 (m, 6H), 1.52-1.49 (m, 2H), 1.42-1.24 (m, 7H), 1.20-1.11 (m, 2H);  $^{13}\text{C NMR}$  (100 MHz,  $\text{CDCl}_3$ )  $\delta$  166.9, 149.5, 145.5, 142.6, 142.4, 133.1, 132.4, 128.4, 126.1, 125.2, 123.8, 111.3, 110.5, 66.0, 57.2, 48.4, 33.0, 32.6, 26.5, 25.5, 25.1, 24.80, 24.78, 22.4, 21.9; DIMS  $[\text{M}+\text{H}]^+$  calcd for  $\text{C}_{25}\text{H}_{32}\text{N}_3\text{O}_4$  438.2393; found 438.2387.

**Synthesis of 2-(benzyl(2-nitrophenyl)amino)-N-cyclohexyl-2-(furan-2-yl)acetamide (2f).**

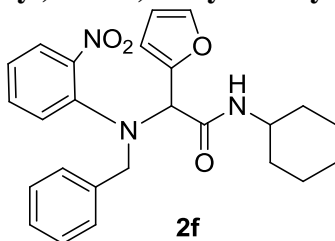

In a similar manner as described in [1], to a solution of 2-nitrophenol (69.6 mg, 0.5 mmol, 1 equiv) in methanol (0.50 mL) was added 2-furaldehyde (41.5  $\mu$ L, 0.5 mmol, 1 equiv), benzylamine (54.6  $\mu$ L, 0.5 mmol, 1 equiv), and cyclohexyl isocyanide (62.2  $\mu$ L, 0.5 mmol, 1 equiv). The reaction mixture was warmed at 50 °C for 30 h. Removal of volatiles gave crude material, which was purified via flash column chromatography (gradient 10-40% ethyl acetate in hexanes, 36 mL/min, Biotage Isolera, SNAP-Ultra cartridge) to afford *N*-arylamide **2f** (60.9 mg, 28%).  $R_f = 0.62$  (50:50 EtOAc:Hex);  $^1\text{H NMR}$  (400 MHz,  $\text{CDCl}_3$ )  $\delta$  7.62 (d,  $J = 8.0$  Hz, 1H), 7.44 (br s, 1H, NH), 7.40-7.33 (m, 2H), 7.19-7.14 (m, 3H), 7.13-7.09 (m, 2H), 6.92-6.87 (m, 2H), 6.40 (d,  $J = 2.8$  Hz, 1H), 6.35-6.32 (m, 1H), 5.06 (s, 1H), 4.20-4.06 (m, 2H), 3.80-3.69 (m, 1H), 1.93-1.84 (m, 1H), 1.77-1.64 (m, 3H), 1.63-1.58 (m, 1H), 1.36-1.28 (m, 2H), 1.27-1.21 (m, 2H), 1.18-1.10 (m, 1H);  $^{13}\text{C NMR}$  (100 MHz,  $\text{CDCl}_3$ )  $\delta$  167.1, 149.3, 146.9, 142.9, 142.0, 135.6, 132.8, 129.0, 129.0, 128.4, 128.4, 127.7, 127.0, 125.1, 125.0, 111.4, 110.7, 65.7, 55.9, 48.4, 32.9, 32.7, 25.6, 24.9, 24.8; DIMS  $[\text{M}+\text{H}]^+$  calcd for  $\text{C}_{25}\text{H}_{28}\text{N}_3\text{O}_4$  434.2080; found 434.2075.

**Synthesis of *N*-cyclohexyl-2-(furan-2-yl)-2-((2-nitrophenyl)(phenethyl)amino)acetamide (2g).**

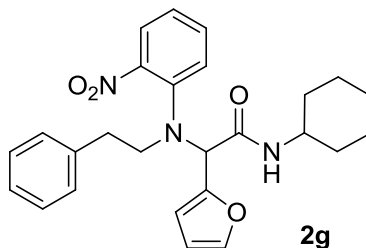

In a similar manner as described in [1], to a solution of 2-nitrophenol (69.6 mg, 0.5 mmol, 1 equiv) in methanol (0.50 mL) was added 2-furaldehyde (41.5  $\mu$ L, 0.5 mmol, 1 equiv), phenethylamine (62.9  $\mu$ L, 0.5 mmol, 1 equiv), and cyclohexyl isocyanide (62.2  $\mu$ L, 0.5 mmol, 1 equiv). The reaction mixture was warmed at 50 °C for 30 h. Removal of volatiles gave crude material, which was purified via flash column chromatography (gradient 13-40% ethyl acetate in hexanes, 36 mL/min, Biotage Isolera, SNAP-Ultra cartridge) to afford *N*-arylamide **2g** (62.7 mg, 28%).  $R_f = 0.55$  (50:50 EtOAc:Hex);  $^1\text{H NMR}$  (400 MHz,  $\text{CDCl}_3$ )  $\delta$  7.74 (d,  $J = 8.0$  Hz, 1H), 7.52 (dd,  $J = 7.8, 7.8$  Hz, 1H), 7.43-7.37 (m, 2H), 7.34 (br s, 1H, NH), 7.25-7.14 (m, 4H), 6.89 (d,  $J = 6.8$  Hz, 2H), 6.40 (dd,  $J = 11.3, 2.2$  Hz, 2H), 5.14 (s, 1H), 3.78-3.67 (m, 1H), 3.21-3.04 (m, 2H), 2.46-2.32 (m, 2H), 1.93-1.83 (m, 1H), 1.76-1.66 (m, 3H), 1.64-1.56 (m, 1H), 1.37-1.23 (m, 2H), 1.22-1.13 (m, 2H), 1.10-0.98 (m, 1H);  $^{13}\text{C NMR}$  (100 MHz,  $\text{CDCl}_3$ )  $\delta$  167.0, 149.3, 146.7, 142.8, 142.2, 138.5, 133.2, 128.7, 128.6, 126.5, 126.2, 125.3, 125.0, 111.5, 110.7, 65.4, 53.0, 48.4, 33.9, 32.9, 32.5, 25.5, 24.9(2C); DIMS  $[\text{M}+\text{H}]^+$  calcd for  $\text{C}_{26}\text{H}_{30}\text{N}_3\text{O}_4$  448.2236; found 448.2232.

**Synthesis of *N*-cyclohexyl-2-(cyclohexyl(2-nitrophenyl)amino)-2-(furan-2-yl)acetamide (2h).**

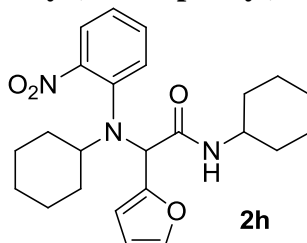

In a similar manner as described in [1], to a solution of 2-nitrophenol (69.6 mg, 0.5 mmol, 1 equiv) in methanol (0.50 mL) was added 2-furaldehyde (41.5  $\mu$ L, 0.5 mmol, 1 equiv), cyclohexylamine (57.3  $\mu$ L, 0.5 mmol, 1 equiv), and cyclohexyl isocyanide (62.2  $\mu$ L, 0.5 mmol, 1 equiv). The reaction mixture was warmed at 50 °C for 30 h. Removal of volatiles gave crude material, which was purified via flash column chromatography (gradient 12-40% ethyl acetate in hexanes, 36 mL/min, Biotage Isolera, SNAP-Ultra cartridge) to afford *N*-arylamide **2h** (53.2 mg, 25%).  $R_f = 0.57$  (50:50 EtOAc:Hex);  $^1\text{H NMR}$  (400 MHz,  $\text{CDCl}_3$ )  $\delta$  7.82 (br s, 1H, NH), 7.60 (d,  $J = 8.0$  Hz, 1H), 7.37 (dd,  $J = 7.4, 7.4$  Hz, 1H), 7.25-7.17 (m, 3H), 6.33 (d,  $J = 2.9$  Hz, 1H), 6.18-6.14 (m, 1H), 5.06 (s, 1H), 3.77-3.65 (m, 1H), 2.80-2.70 (m, 1H), 1.91-1.83 (m, 2H), 1.77-1.62 (m, 6H), 1.61-1.54 (m, 1H), 1.52-1.45 (m, 1H), 1.36-1.18 (m, 4H), 1.16-1.05 (m, 3H), 0.96-0.74 (m, 3H);  $^{13}\text{C NMR}$  (100 MHz,  $\text{CDCl}_3$ )  $\delta$  168.9, 150.1, 150.0, 142.3, 139.4, 131.8, 131.2, 126.4, 124.3, 110.8, 110.3, 64.8, 63.0, 48.1, 32.8, 32.7, 30.6, 29.2, 26.1, 25.9, 25.5, 24.9; DIMS  $[\text{M}+\text{H}]^+$  calcd for  $\text{C}_{24}\text{H}_{32}\text{N}_3\text{O}_4$  426.2393; found 426.2388.

### Synthesis of 2-(allyl(2-nitrophenyl)amino)-*N*-cyclohexyl-2-(furan-2-yl)acetamide (**2i**).

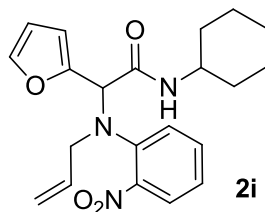

In a similar manner as described in [1], to a solution of 2-nitrophenol (69.5 mg, 0.5 mmol, 1 equiv) in methanol (0.50 mL) was added 2-furaldehyde (41  $\mu$ L, 0.5 mmol, 1 equiv), allyl amine (38  $\mu$ L, 0.5 mmol, 1 equiv), and cyclohexyl isocyanide (62.2  $\mu$ L, 0.5 mmol, 1 equiv). The reaction mixture was warmed at 50 °C for 6 h. Removal of volatiles gave the crude material, which was purified via flash column chromatography on silica gel (35% ethyl acetate in hexanes) to afford **2i** for characterization.  $R_f = 0.10$  (40:60 Et<sub>2</sub>O:Hex); <sup>1</sup>H NMR (400 MHz, CDCl<sub>3</sub>)  $\delta$  7.70 (d,  $J = 8.1$  Hz, 1H), 7.48 (dd,  $J = 7.8, 7.8$  Hz, 1H), 7.38 (d,  $J = 1.8$  Hz, 1H), 7.35 (d,  $J = 8.2$  Hz, 1H), 7.19 (dd,  $J = 7.8, 7.7$  Hz, 1H), 6.42 (d,  $J = 3.2$  Hz, 1H), 6.33 (dd,  $J = 3.3, 1.4$  Hz, 1H), 5.54-5.44 (m, 1H), 5.10 (s, 1H), 4.99 (d,  $J = 10.2$  Hz, 1H), 4.92 (d,  $J = 17.1$  Hz, 1H), 3.79-3.69 (m, 1H), 3.59-3.49 (m, 2H), 1.92-1.88 (m, 1H), 1.74-1.57 (m, 5H), 1.38-1.07 (m, 4H); <sup>13</sup>C NMR (100 MHz, CDCl<sub>3</sub>)  $\delta$  166.9, 149.2, 142.7, 142.1, 133.0, 132.2, 126.3, 125.0, 124.7, 119.5, 111.2, 110.6, 77.2, 65.0, 54.5, 48.2, 32.9, 32.5, 25.5, 24.8, 24.7.

### Synthesis of 2-(allyl(2-nitrophenyl)amino)-*N*-(*tert*-butyl)-2-(furan-3-yl)acetamide (**3a**).

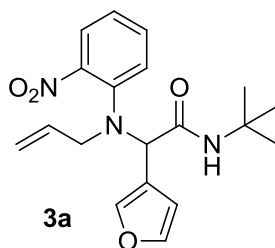

In a similar manner as described in [1], to a solution of 2-nitrophenol (50.1 mg, 0.37 mmol, 1 equiv) in methanol (0.37 mL) was added 3-furaldehyde (31.2  $\mu$ L, 0.37 mmol, 1 equiv), allylamine (27  $\mu$ L, 0.37 mmol, 1 equiv), and *tert*-butyl isocyanide (81.5  $\mu$ L, 0.74 mmol, 2 equiv). The reaction mixture was warmed at 50 °C for 30 h. Removal of volatiles gave crude material, which was purified via flash column chromatography on silica gel (20% ethyl acetate in hexanes) to afford *N*-arylamide **3a** (79.9 mg, 45%).  $R_f = 0.76$  (50:50 EtOAc:Hex); <sup>1</sup>H NMR (400 MHz, CDCl<sub>3</sub>)  $\delta$  7.67 (d,  $J = 7.4$  Hz, 1H), 7.47-7.39 (m, 2H), 7.33 (s, 1H), 7.24-7.15 (m, 3H), 6.35 (s, 1H), 5.66-5.53 (m, 1H), 5.04 (d,  $J = 10.1$  Hz, 1H), 4.95-4.89 (m, 1H), 4.76 (s, 1H), 3.58 (dd,  $J = 6.7, 6.6$  Hz, 1H), 3.47 (dd,  $J = 6.5, 6.5$  Hz, 1H), 1.25 (s, 9H); <sup>13</sup>C NMR (100 MHz, CDCl<sub>3</sub>)  $\delta$  169.1, 147.2, 143.4, 142.2, 142.1, 132.7, 131.9, 126.6, 125.1, 124.8, 120.4, 120.0, 110.1, 64.0, 55.1, 51.1, 28.5; HR-FAB MS [M+H]<sup>+</sup> calcd for C<sub>19</sub>H<sub>24</sub>N<sub>3</sub>O<sub>4</sub> 358.1767; found 358.1767.



### Synthesis of 2-(allyl(2-nitrophenyl)amino)-*N*-cyclohexyl-2-(furan-3-yl)acetamide (**3b**).

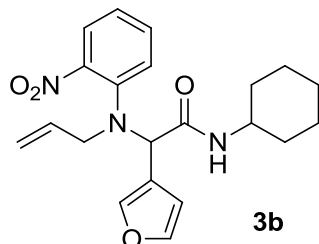

In a similar manner as described in [1], to a solution of 2-nitrophenol (69.6 mg, 0.5 mmol, 1 equiv) in methanol (0.50 mL) was added 3-furaldehyde (43.3  $\mu$ L, 0.5 mmol, 1 equiv), allylamine (38.0  $\mu$ L, 0.5 mmol, 1 equiv), and cyclohexyl isocyanide (62.2  $\mu$ L, 0.5 mmol, 1 equiv). The reaction mixture warmed at 50 °C for 30 h. Removal of volatiles gave crude material, which was purified via flash column chromatography on silica gel (15% ethyl acetate in hexanes) to afford *N*-arylamide **3b** (123.8 mg, 64%).  $R_f = 0.51$  (50:50 EtOAc:Hex);  $^1\text{H NMR}$  (400 MHz,  $\text{CDCl}_3$ )  $\delta$  7.75 (d,  $J = 8.0$  Hz, 1H), 7.53-7.50 (m, 2H), 7.41 (s, 1H), 7.34-7.28 (m, 3H), 6.44 (s, 1H), 5.72-5.62 (m, 1H), 5.13 (d,  $J = 10.1$  Hz, 1H), 5.02 (d,  $J = 17.1$  Hz, 1H), 4.96 (s, 1H), 3.79-3.71 (m, 1H), 3.65 (dd,  $J = 6.7, 6.6$  Hz, 1H), 3.55 (dd,  $J = 6.6, 6.5$  Hz, 1H), 1.94-1.86 (m, 1H), 1.78-1.62 (m, 4H), 1.44-1.19 (m, 4H), 1.15-1.03 (m, 1H);  $^{13}\text{C NMR}$  (100 MHz,  $\text{CDCl}_3$ )  $\delta$  168.8, 147.1, 143.3, 142.1, 141.8, 132.6, 131.6, 126.3, 125.0, 124.6, 120.3, 120.0, 109.9, 63.0, 55.1, 47.9, 32.7, 32.5, 25.4, 24.6, 24.5; HR-FAB MS  $[\text{M}+\text{Na}]^+$  calcd for  $\text{C}_{21}\text{H}_{25}\text{N}_3\text{NaO}_4$  406.1743; found 406.1743.

### Synthesis of 2-(but-3-en-1-yl(2-nitrophenyl)amino)-*N*-(*tert*-butyl)-2-(furan-3-yl)acetamide (**3c**).

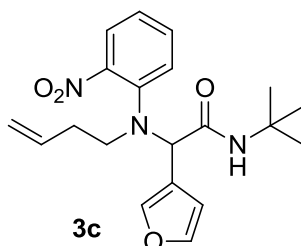

In a similar manner as described in [1], to a solution of 2-nitrophenol (69.6 mg, 0.5 mmol, 1 equiv) in methanol (0.50 mL) was added 3-furaldehyde (43.2  $\mu$ L, 0.5 mmol, 1 equiv), 3-butenylamine (45.8  $\mu$ L, 0.5 mmol, 1 equiv), and *tert*-butyl isocyanide (113.1  $\mu$ L, 1.0 mmol, 2 equiv). The reaction mixture was warmed at 50 °C for 30 h. Removal of volatiles gave crude material, which was purified via flash column chromatography on silica gel (15% ethyl acetate in hexanes) to afford *N*-arylamide **3c** (108.1 mg, 58%).  $R_f = 0.18$  (20:80 EtOAc:Hex);  $^1\text{H NMR}$  (400 MHz,  $\text{CDCl}_3$ )  $\delta$  7.64 (d,  $J = 7.9$  Hz, 1H), 7.40 (dd,  $J = 7.4, 7.4$  Hz, 1H), 7.30-7.23 (m, 2H), 7.23-7.08 (m, 3H), 6.28 (s, 1H), 5.61-5.46 (m, 1H), 4.92-4.79 (m, 2H), 4.67 (s, 1H), 3.06-2.94 (m, 1H), 2.91-2.79 (m, 1H), 2.03-1.81 (m, 2H), 1.24 (s, 9H);  $^{13}\text{C NMR}$  (100 MHz,  $\text{CDCl}_3$ )  $\delta$  169.1, 147.9, 143.2, 142.3, 141.9, 135.0, 132.7, 126.9, 125.6, 124.9, 119.5, 117.2, 110.6, 64.8, 51.2, 51.1, 31.3, 29.6; HR-FAB MS  $[\text{M}+\text{H}]^+$  calcd for  $\text{C}_{20}\text{H}_{26}\text{N}_3\text{O}_4$  372.1923; found 372.1911.

**Synthesis of 2-(but-3-en-1-yl(2-nitrophenyl)amino)-*N*-cyclohexyl-2-(furan-3-yl)acetamide (3d).**

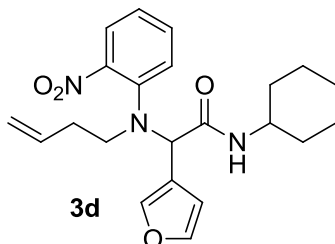

In a similar manner as described in [1], to a solution of 2-nitrophenol (69.6 mg, 0.5 mmol, 1 equiv) in methanol (0.50 mL) was added 3-furaldehyde (43.3  $\mu$ L, 0.5 mmol, 1 equiv), 3-butenylamine (45.8  $\mu$ L, 0.5 mmol, 1 equiv), and cyclohexyl isocyanide (62.2  $\mu$ L, 0.5 mmol, 1 equiv). The reaction mixture was warmed at 50 °C for 30 h. Removal of volatiles gave crude material, which was purified via flash column chromatography on silica gel (15% ethyl acetate in hexanes) to afford *N*-arylamide **3d** (103.3 mg, 52%).  $R_f$  = 0.51 (50:50 EtOAc:Hex);  $^1\text{H}$  NMR (400 MHz,  $\text{CDCl}_3$ )  $\delta$  7.69 (d,  $J$  = 7.8 Hz, 1H), 7.47 (dd,  $J$  = 7.4, 7.4 Hz, 1H), 7.36 (s, 1H), 7.33 (s, 1H), 7.28-7.19 (m, 3H), 6.33 (s, 1H), 5.62-5.51 (m, 1H), 4.95-4.84 (m, 3H), 3.74-3.67 (m, 1H), 3.08-3.01 (m, 1H), 2.94-2.87 (m, 1H), 2.05-1.91 (m, 2H), 1.86 (d,  $J$  = 12.0 Hz, 1H), 1.75-1.54 (m, 5H), 1.38-1.12 (m, 3H), 1.09-1.00 (m, 1H);  $^{13}\text{C}$  NMR (100 MHz,  $\text{CDCl}_3$ )  $\delta$  168.8, 147.7, 143.1, 142.2, 141.8, 134.7, 132.7, 126.6, 125.4, 124.8, 119.5, 117.1, 110.3, 63.9, 51.1, 48.0, 32.8, 32.5, 31.0, 25.4, 24.7, 24.6; HR-FAB MS  $[\text{M}+\text{Na}]^+$  calcd for  $\text{C}_{22}\text{H}_{27}\text{N}_3\text{NaO}_4$  420.1899; found 420.1918.

**Synthesis of *N*-(*tert*-butyl)-2-(furan-3-yl)-2-((2-nitrophenyl)-(prop-2-yn-1-yl)amino)acetamide (3e).**

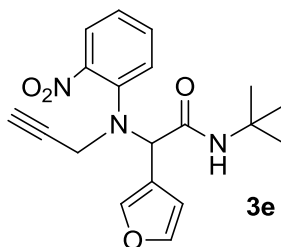

In a similar manner as described in [1], to a solution of 2-nitrophenol (69.7 mg, 0.5 mmol, 1 equiv) in methanol (0.50 mL) was added 3-furaldehyde (43.2  $\mu$ L, 0.5 mmol, 1 equiv), propargylamine (32.0  $\mu$ L, 0.5 mmol, 1 equiv), and *tert*-butyl isocyanide (114  $\mu$ L, 1.0 mmol, 2 equiv). The reaction mixture was warmed at 50 °C for 30 h. Removal of volatiles gave crude material, which was purified via flash column chromatography on silica gel (20% ethyl acetate in hexanes) to afford *N*-arylamide **3e** (40.7 mg, 23%).  $R_f$  = 0.70 (50:50 EtOAc:Hex);  $^1\text{H}$  NMR (400 MHz,  $\text{CDCl}_3$ )  $\delta$  7.68 (d,  $J$  = 7.7 Hz, 1H), 7.58 (s, 1H), 7.54-7.49 (m, 2H), 7.37 (s, 1H), 7.34-7.28 (m, 1H), 6.89 (s, 1H), 6.41 (s, 1H), 4.95 (s, 1H), 3.61 (dd,  $J$  = 17.9, 2.2 Hz, 1H), 3.53 (dd,  $J$  = 17.8, 2.0 Hz, 1H), 2.27 (s, 1H), 1.12 (s, 9H);  $^{13}\text{C}$  NMR (100 MHz,  $\text{CDCl}_3$ )  $\delta$  168.7, 147.7, 143.9, 142.6, 141.1, 132.7, 126.7, 126.4, 124.3, 120.6, 109.2, 76.8, 75.2, 62.4, 51.2, 43.6, 28.4; DIMS  $[\text{M}+\text{H}]^+$  calcd for  $\text{C}_{19}\text{H}_{22}\text{N}_3\text{O}_4$  356.1610; found 356.1601.

**Synthesis of *N*-cyclohexyl-2-(furan-3-yl)-2-((2-nitrophenyl)(prop-2-yn-1-yl)amino)acetamide (3f).**

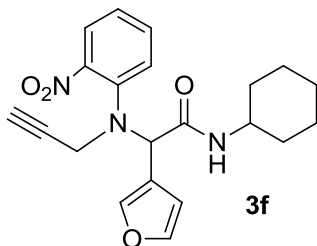

In a similar manner as described in [1], to a solution of 2-nitrophenol (69.6 mg, 0.5 mmol, 1 equiv) in methanol (0.50 mL) was added 3-furaldehyde (43.3  $\mu$ L, 0.5 mmol, 1 equiv), propargylamine (32.1  $\mu$ L, 0.5 mmol, 1 equiv), and cyclohexyl isocyanide (62.2  $\mu$ L, 0.5 mmol, 1 equiv). The reaction mixture was warmed at 50 °C for 30 h. Removal of volatiles gave crude material, which was purified via flash column chromatography on silica gel (20% ethyl acetate in hexanes) to afford *N*-arylamide **3f** (92.2 mg, 48%).  $R_f$  = 0.47 (50:50 EtOAc:Hex);  $^1\text{H NMR}$  (400 MHz,  $\text{CDCl}_3$ )  $\delta$  7.65 (d,  $J$  = 8.0 Hz, 1H), 7.59 (s, 1H), 7.51-7.50 (m, 2H), 7.36 (s, 1H), 7.33-7.30 (m, 1H), 7.02 (d,  $J$  = 8.3 Hz, 1H), 6.40 (s, 1H), 5.07 (s, 1H), 3.70-3.54 (m, 3H), 2.27 (s, 1H), 1.78-1.64 (m, 3H), 1.56-1.47 (m, 2H), 1.30-1.04 (m, 4H), 0.79-0.70 (m, 1H);  $^{13}\text{C NMR}$  (100 MHz,  $\text{CDCl}_3$ )  $\delta$  168.5, 147.7, 143.8, 142.6, 140.9, 132.7, 126.4(2C), 124.2, 120.5, 109.1, 76.7, 75.2, 61.4, 47.9, 43.6, 32.7, 32.4, 25.4, 24.8, 24.7; HR-FAB MS  $[\text{M}+\text{H}]^+$  calcd for  $\text{C}_{21}\text{H}_{24}\text{N}_3\text{O}_4$  382.1767; found 382.1768.

**Synthesis of 2-(allyl(2-nitrophenyl)amino)-*N*-cyclohexyl-2-(thiophen-2-yl)acetamide (4a).**

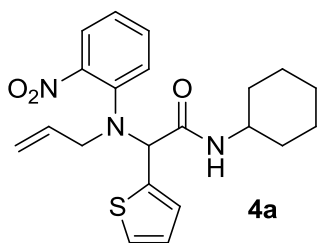

In a similar manner as described in [1], to a solution of 2-nitrophenol (69.8 mg, 0.5 mmol, 1 equiv) in methanol (0.50 mL) was added 2-thiophenecarboxaldehyde (46.7  $\mu$ L, 0.5 mmol, 1 equiv), allylamine (38  $\mu$ L, 0.5 mmol, 1 equiv), and cyclohexyl isocyanide (62  $\mu$ L, 0.5 mmol, 1 equiv). The reaction mixture was warmed at 50 °C for 30 h. Removal of volatiles gave crude material, which was purified via flash column chromatography on silica gel (10% ethyl acetate in hexanes) to afford *N*-aryl amide **4a** (49.3 mg, 25%).  $R_f$  = 0.13 (20:80 EtOAc:Hex);  $^1\text{H NMR}$  (400 MHz,  $\text{CDCl}_3$ )  $\delta$  7.69 (d,  $J$  = 8.0 Hz, 1H), 7.45 (dd,  $J$  = 8.0, 7.6 Hz, 1H), 7.29-7.19 (m, 4H), 7.05 (d,  $J$  = 2.6 Hz, 1H), 6.91 (dd,  $J$  = 4.3, 4.3 Hz, 1H), 5.65-5.55 (m, 1H), 5.22 (s, 1H), 5.06 (d,  $J$  = 10.1 Hz, 1H), 4.91 (d,  $J$  = 17.1 Hz, 1H), 3.67-3.62 (m, 1H), 3.60-3.46 (m, 2H), 1.86-1.77 (m, 1H), 1.73-1.64 (m, 1H), 1.60-1.50 (m, 3H), 1.33-1.09 (m, 4H), 0.96-0.88 (m, 1H);  $^{13}\text{C NMR}$  (100 MHz,  $\text{CDCl}_3$ )  $\delta$  168.4, 147.1, 141.8, 138.4, 132.7, 131.4, 128.4, 126.5, 126.4 (2C), 125.3, 124.7, 120.3, 66.8, 55.4, 48.0, 32.5, 32.4, 25.4, 24.7, 24.6; DIMS  $[\text{M}+\text{H}]^+$  calcd for  $\text{C}_{21}\text{H}_{26}\text{N}_3\text{O}_3\text{S}$  400.1695; found 400.1690.

Synthesis of 2-(but-3-en-1-yl(2-nitrophenyl)amino)-*N*-cyclohexyl-2-(thiophen-2-yl)acetamide (**4b**).

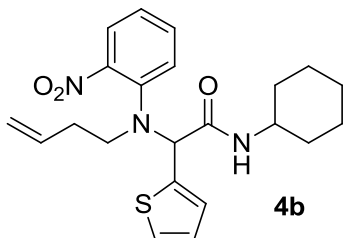

In a similar manner as described in [1], to a solution of 2-nitrophenol (69.8 mg, 0.5 mmol, 1 equiv) in methanol (0.50 mL) was added 2-thiophenecarboxaldehyde (46.7  $\mu$ L, 0.5 mmol, 1 equiv), 3-butenylamine (45.8  $\mu$ L, 0.5 mmol, 1 equiv), and cyclohexyl isocyanide (61.3  $\mu$ L, 0.5 mmol, 1 equiv). The reaction mixture was warmed at 50 °C for 48 h. Removal of volatiles gave crude material, which was purified via flash column chromatography on silica gel (20% ethyl ether in hexanes) to afford *N*-aryl amide **4b** (47.5 mg, 23%).  $R_f = 0.10$  (40:60 Et<sub>2</sub>O:Hex); <sup>1</sup>H NMR (400 MHz, CDCl<sub>3</sub>)  $\delta$  7.70 (dd,  $J = 8.1, 1.6$  Hz, 1H), 7.46 (dd,  $J = 8.7, 7.0$  Hz, 1H), 7.30-7.18 (m, 4H), 6.96 (d,  $J = 3.5$  Hz, 1H), 6.91 (dd,  $J = 5.1, 3.5$  Hz, 1H), 5.60-5.49 (m, 1H), 5.20 (s, 1H), 4.92 (dd,  $J = 10.2, 1.6$  Hz, 1H), 4.86 (dd,  $J = 17.1, 1.6$  Hz, 1H), 3.74-3.64 (m, 1H), 3.08-2.89 (m, 2H), 2.10-1.99 (m, 1H), 1.98-1.90 (m, 1H), 1.89-1.82 (m, 1H), 1.74-1.66 (m, 1H), 1.66-1.56 (m, 2H), 1.35-1.13 (m, 5H), 1.06-0.96 (m, 1H); <sup>13</sup>C NMR (100 MHz, CDCl<sub>3</sub>)  $\delta$  168.5, 147.8, 141.8, 137.6, 134.9, 132.8, 128.7, 126.9, 126.6, 126.4, 125.6, 124.9, 117.2, 67.5, 51.3, 48.2, 32.8, 32.6, 31.0, 25.6, 24.8, 24.7; DIMS [M+H]<sup>+</sup> calcd for C<sub>22</sub>H<sub>28</sub>N<sub>3</sub>O<sub>3</sub>S 414.1851; found 414.1845.

Stacked  $^1\text{H}$  NMRs for reaction monitoring (related to Scheme 2)

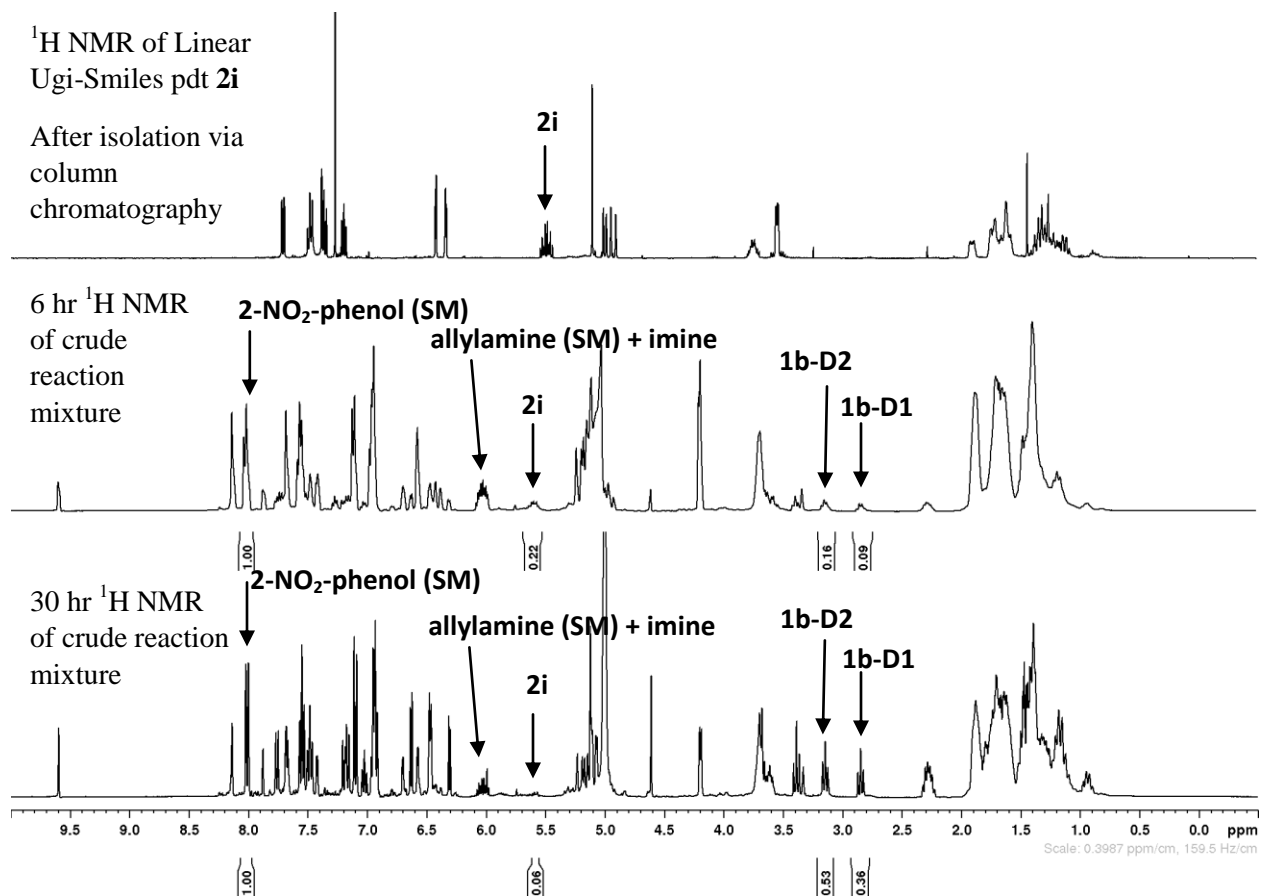

All  $^1\text{H}$  spectra were acquired in  $\text{CDCl}_3$ . Formation of linear Ugi-Smiles adduct **2i** was tracked by the appearance of the representative diagnostic allylic peak (marked **2i** above), as that peak did not overlap with other starting material or US-IMDA product peaks. Formation of diastereomers **1b-D1** and **1b-D2** were tracked by the diagnostic dd between 2.5-3.2 ppm, as these did not overlap with starting material or linear **2i** product peaks. Conversion was estimated by integrations.

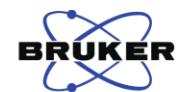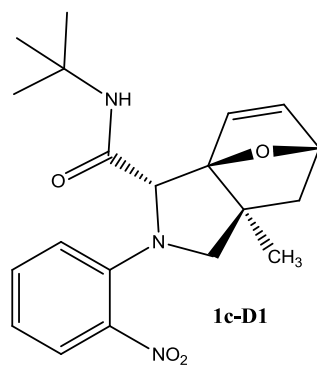

<sup>1</sup>H NMR, CDCl<sub>3</sub>

400 MHz

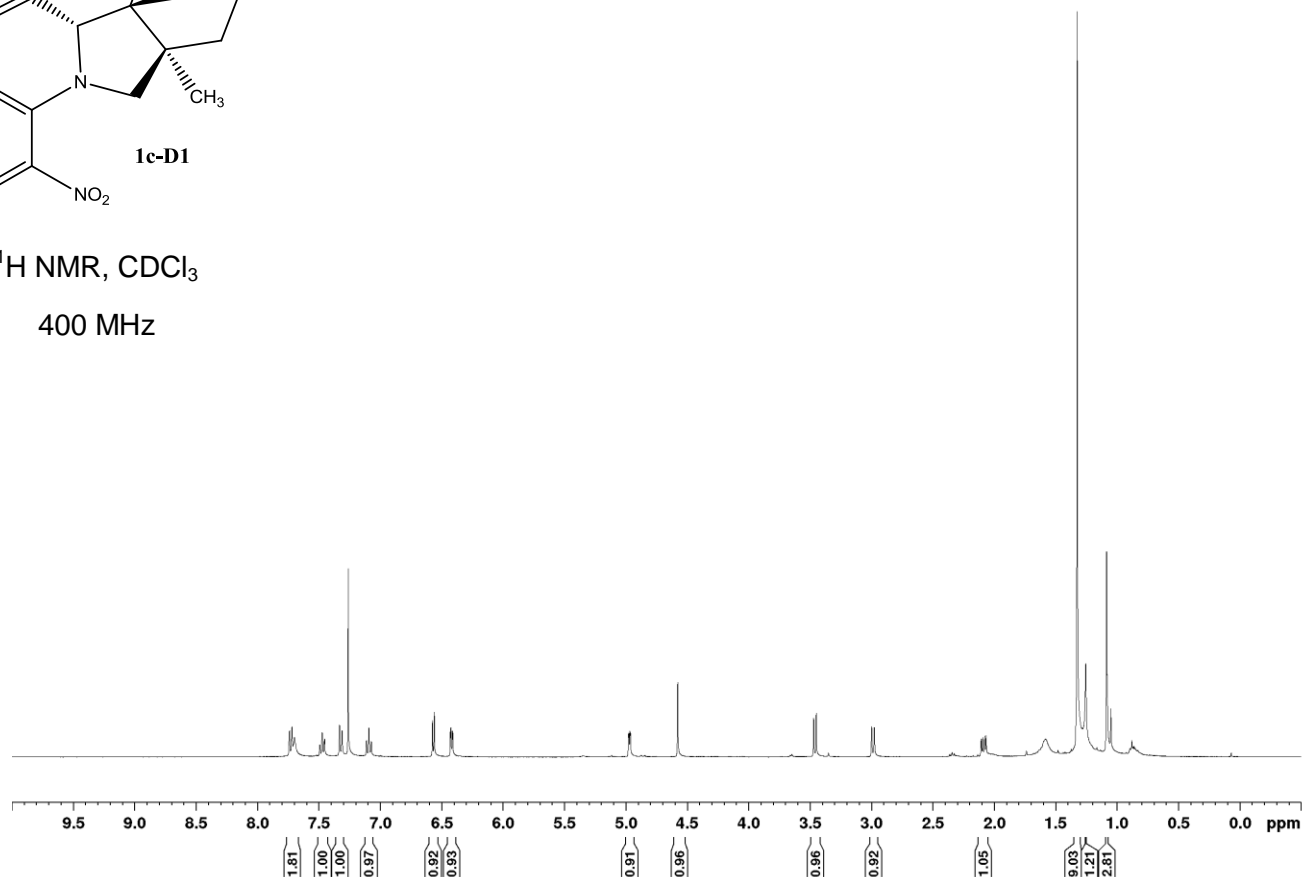

Current Data Parameters  
NAME methyl allylamine I  
EXPNO 1  
PROCNO 1

F2 - Acquisition Parameters  
Date\_ 20160718  
Time 2.38  
INSTRUM spect  
PROBHD 5 mm PABBO BB/  
PULPROG zg30  
TD 65536  
SOLVENT CDCl3  
NS 32  
DS 2  
SWH 8012.820 Hz  
FIDRES 0.122266 Hz  
AQ 4.0894465 sec  
RG 188.11  
DW 62.400 usec  
DE 6.50 usec  
TE 298.2 K  
D1 1.0000000 sec  
TD0 1

===== CHANNEL f1 =====  
SF01 400.1524711 MHz  
NUC1 1H  
P1 15.00 usec  
PLW1 9.80000019 W

F2 - Processing parameters  
SI 65536  
SF 400.1500099 MHz  
WDW EM  
SSB 0  
LB 0.30 Hz  
GB 0  
PC 1.00

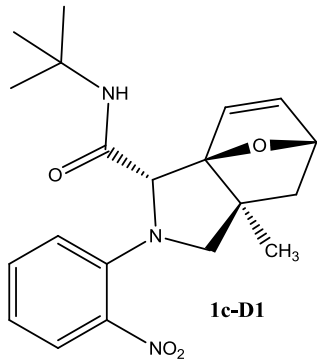

<sup>13</sup>C NMR, CDCl<sub>3</sub>  
100 MHz

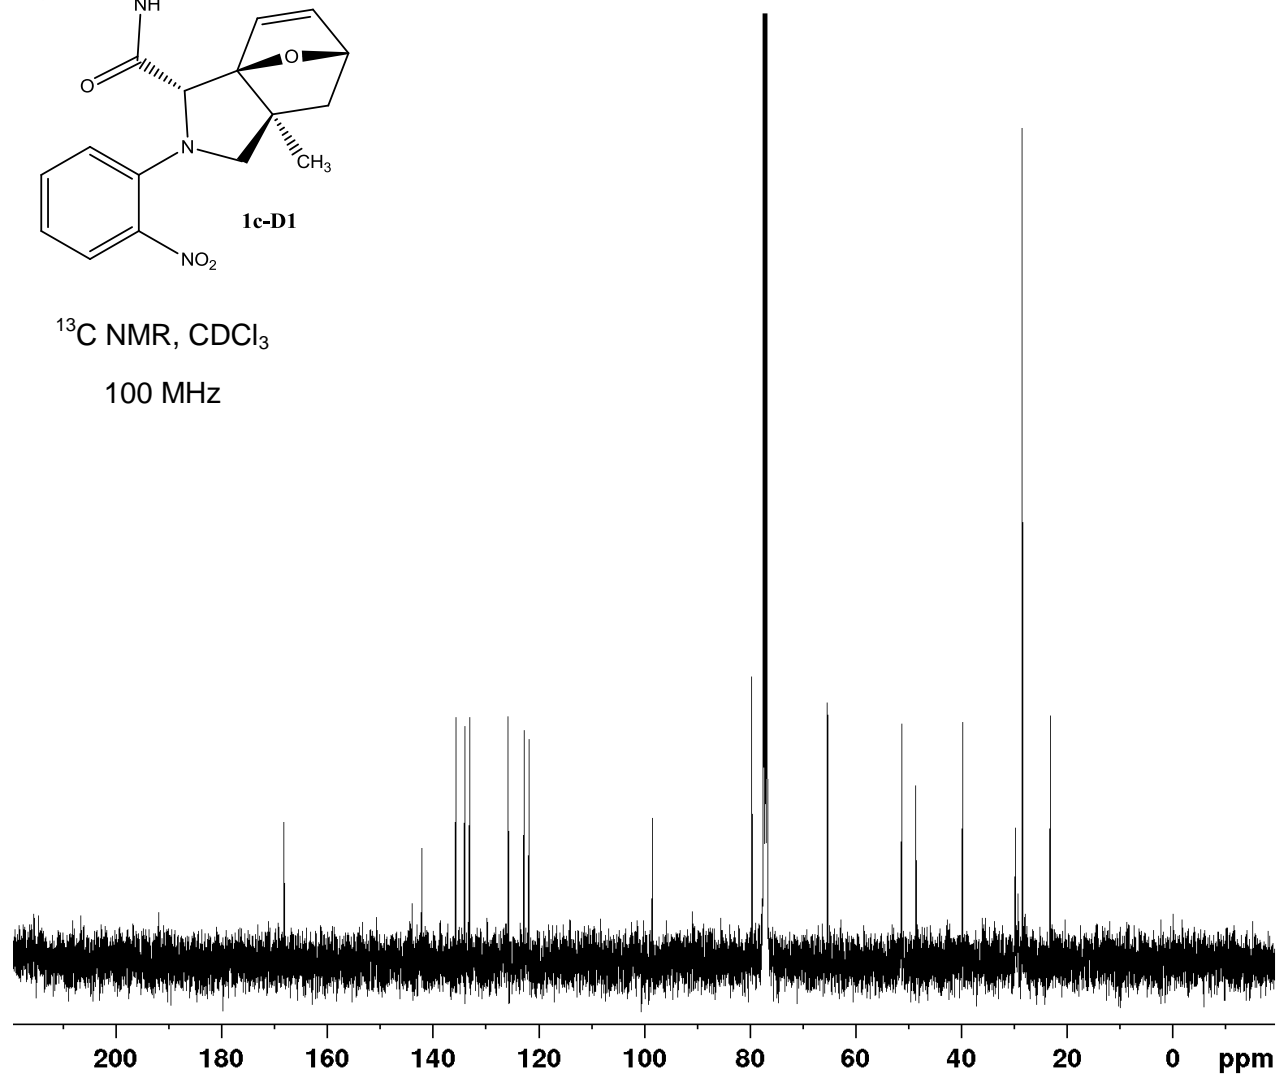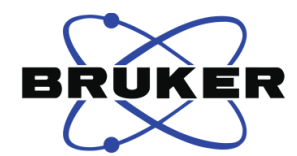

```

Current Data Parameters
NAME      KM-35-D1-C-again
EXPNO     20
PROCNO    1

F2 - Acquisition Parameters
Date_     20150526
Time      21.41
INSTRUM   spect
PROBHD    5 mm PABBO BB/
PULPROG   zgpg30
TD         65536
SOLVENT   CDCl3
NS         2048
DS         4
SWH        24038.461 Hz
FIDRES     0.366798 Hz
AQ         1.3631488 sec
RG         210.96
DW         20.800 usec
DE         10.00 usec
TE         293.3 K
D1         2.00000000 sec
D11        0.03000000 sec
TD0        1

===== CHANNEL f1 =====
SFO1      100.6278588 MHz
NUC1       13C
P1         10.00 usec
PLW1       48.20000076 W

===== CHANNEL f2 =====
SFO2      400.1516006 MHz
NUC2       1H
CPDPRG[2] waltz16
PCPD2     90.00 usec
PLW2       9.80000019 W
PLW12     0.27221999 W
PLW13     0.22050001 W

F2 - Processing parameters
SI         32768
SF         100.6177873 MHz
WDW        EM
SSB        0
LB         1.00 Hz
GB         0
PC         1.40

```

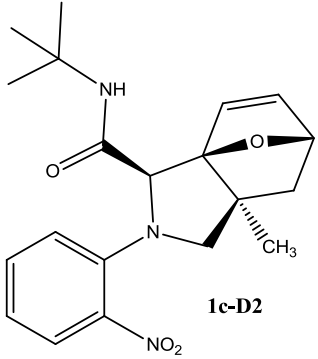

<sup>1</sup>H NMR, CDCl<sub>3</sub>  
400 MHz

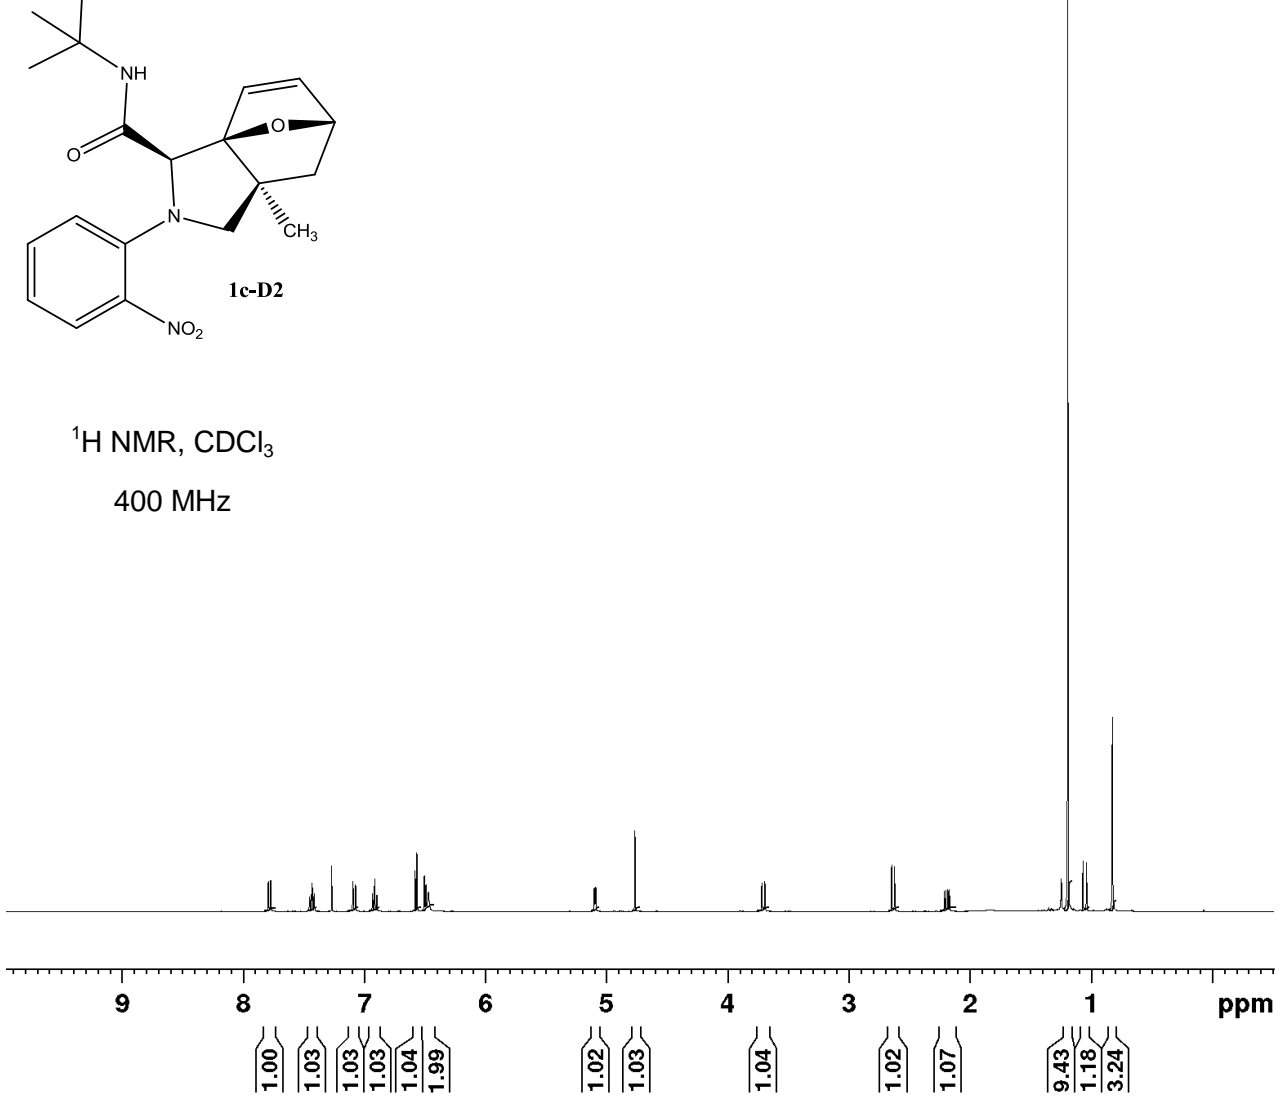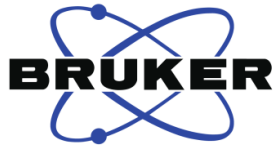

Current Data Parameters  
 NAME KM-35-D2  
 EXPNO 1  
 PROCNO 1

F2 - Acquisition Parameters  
 Date\_ 20150427  
 Time 11.10  
 INSTRUM spect  
 PROBHD 5 mm PABBO BB/  
 PULPROG zg30  
 TD 65536  
 SOLVENT CDCl3  
 NS 16  
 DS 2  
 SWH 8012.820 Hz  
 FIDRES 0.122266 Hz  
 AQ 4.0894465 sec  
 RG 95.15  
 DW 62.400 usec  
 DE 6.50 usec  
 TE 292.4 K  
 D1 1.00000000 sec  
 TD0 1

===== CHANNEL f1 =====  
 SFO1 400.1524711 MHz  
 NUC1 1H  
 P1 15.00 usec  
 PLW1 9.80000019 W

F2 - Processing parameters  
 SI 65536  
 SF 400.1500076 MHz  
 WDW EM  
 SSB 0  
 LB 0.30 Hz  
 GB 0  
 PC 1.00



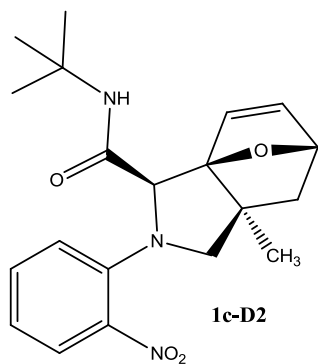

$^{13}\text{C}$  NMR,  $\text{CDCl}_3$   
100 MHz

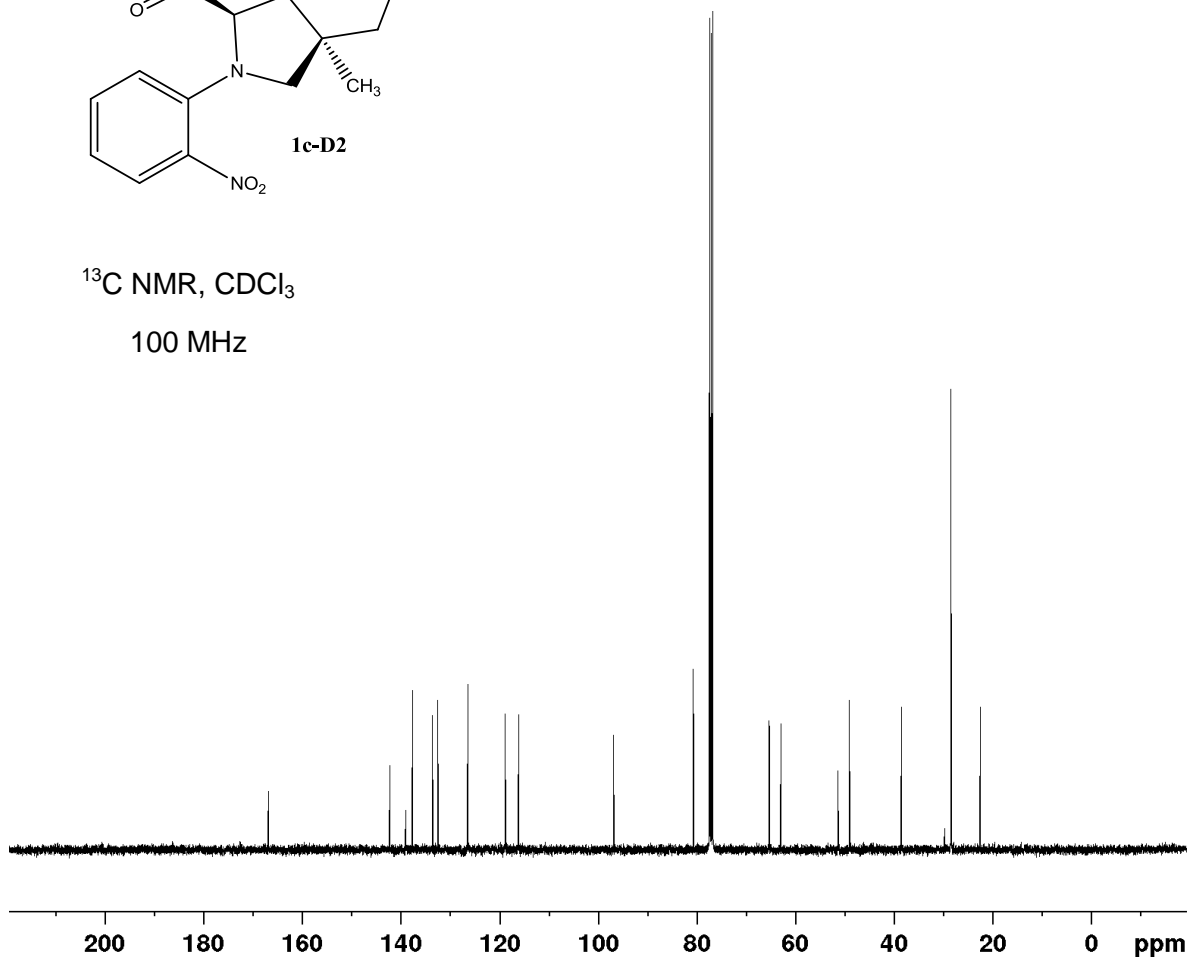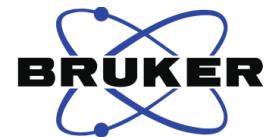

Current Data Parameters  
NAME KM-35-D2-C  
EXPNO 1  
PROCNO 1

F2 - Acquisition Parameters  
Date\_ 20150522  
Time 12.52  
INSTRUM spect  
PROBHD 5 mm PABBO BB/  
PULPROG zgpg30  
TD 65536  
SOLVENT CDCl3  
NS 512  
DS 4  
SWH 24038.461 Hz  
FIDRES 0.366798 Hz  
AQ 1.3631488 sec  
RG 210.96  
DW 20.800 usec  
DE 10.00 usec  
TE 293.8 K  
D1 2.00000000 sec  
D11 0.03000000 sec  
TDO 1

===== CHANNEL f1 =====  
SFO1 100.6278588 MHz  
NUC1 13C  
P1 10.00 usec  
PLW1 48.20000076 W

===== CHANNEL f2 =====  
SFO2 400.1516006 MHz  
NUC2 1H  
CPDPRG[2] waltz16  
PCPD2 90.00 usec  
PLW2 9.80000019 W  
PLW12 0.27221999 W  
PLW13 0.22050001 W

F2 - Processing parameters  
SI 32768  
SF 100.6177874 MHz  
WDW EM  
SSB 0  
LB 1.00 Hz  
GB 0  
PC 1.40

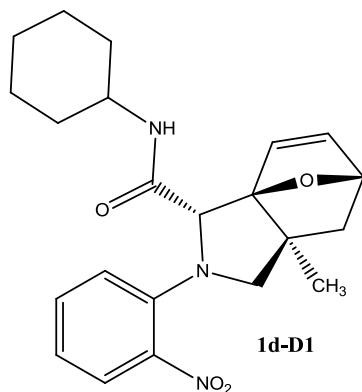

$^1\text{H}$  NMR,  $\text{CDCl}_3$   
400 MHz

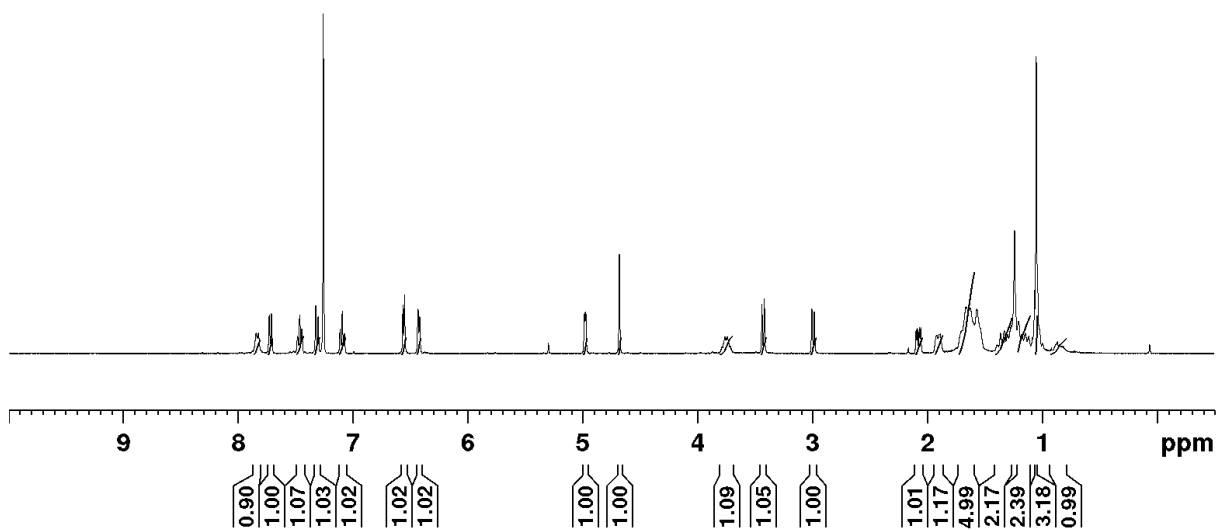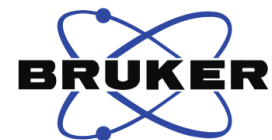

Current Data Parameters  
 NAME KM-38-D1R-2-F23-25  
 EXPNO 10  
 PROCNO 1

F2 - Acquisition Parameters  
 Date\_ 20150515  
 Time 11.14  
 INSTRUM spect  
 PROBHD 5 mm PABBO BB/  
 PULPROG zg30  
 TD 65536  
 SOLVENT  $\text{CDCl}_3$   
 NS 16  
 DS 2  
 SWH 8012.820 Hz  
 FIDRES 0.122266 Hz  
 AQ 4.0894465 sec  
 RG 166.66  
 DW 62.400 usec  
 DE 6.50 usec  
 TE 292.3 K  
 D1 1.00000000 sec  
 TD0 1

----- CHANNEL f1 -----  
 SFO1 400.1524711 MHz  
 NUC1 1H  
 P1 15.00 usec  
 PLW1 9.80000019 W

F2 - Processing parameters  
 SI 65536  
 SF 400.1500120 MHz  
 WDW EM  
 SSB 0  
 LB 0.30 Hz  
 GB 0  
 PC 1.00

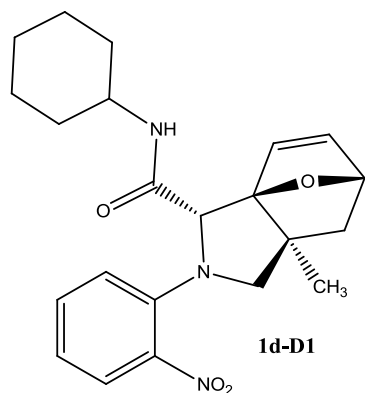

$^{13}\text{C}$  NMR,  $\text{CDCl}_3$   
100 MHz

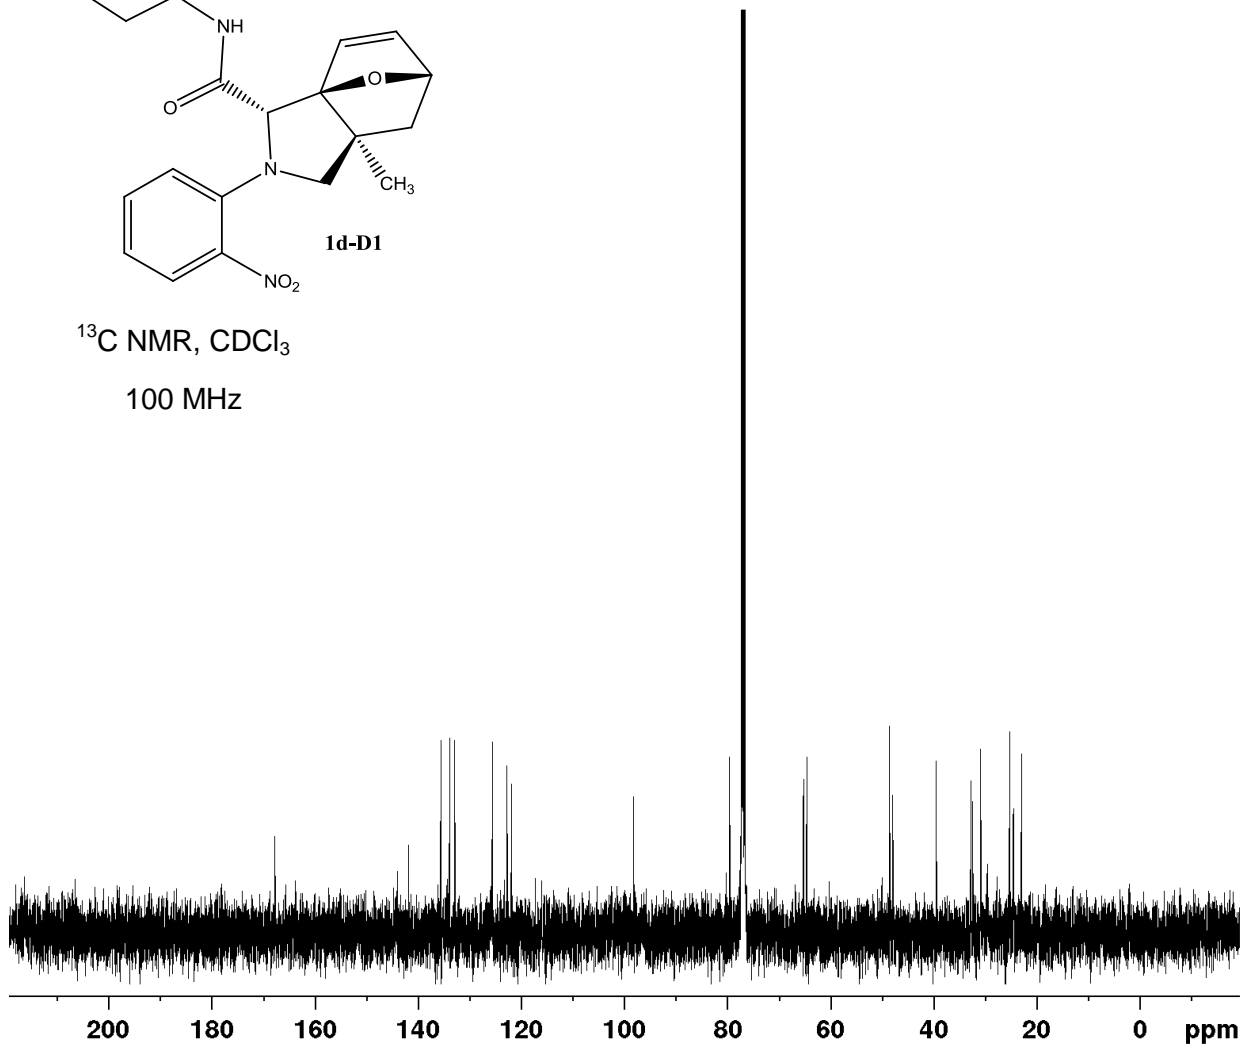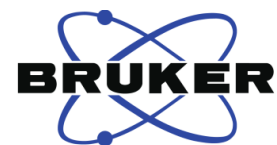

Current Data Parameters  
NAME KM-38-D1R-2-F23-25-C2  
EXPNO 10  
PROCNO 1

F2 - Acquisition Parameters  
Date\_ 20150519  
Time 13.19  
INSTRUM spect  
PROBHD 5 mm PABBO BB/  
PULPROG zgpg30  
TD 65536  
SOLVENT  $\text{CDCl}_3$   
NS 1024  
DS 4  
SWH 24038.461 Hz  
FIDRES 0.366798 Hz  
AQ 1.3631488 sec  
RG 210.96  
DW 20.800 usec  
DE 10.00 usec  
TE 293.8 K  
D1 2.00000000 sec  
D11 0.03000000 sec  
TDO 1

===== CHANNEL f1 =====  
SFO1 100.6278588 MHz  
NUC1  $^{13}\text{C}$   
P1 10.00 usec  
PLW1 48.20000076 W

===== CHANNEL f2 =====  
SFO2 400.1516006 MHz  
NUC2  $^1\text{H}$   
CPDPRG[2] waltz16  
PCPD2 90.00 usec  
PLW2 9.80000019 W  
PLW12 0.27221999 W  
PLW13 0.22050001 W

F2 - Processing parameters  
SI 32768  
SF 100.6178032 MHz  
WDW EM  
SSB 0  
LB 1.00 Hz  
GB 0  
PC 1.40

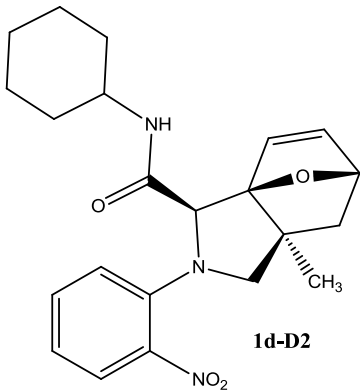

<sup>1</sup>H NMR, CDCl<sub>3</sub>  
400 MHz

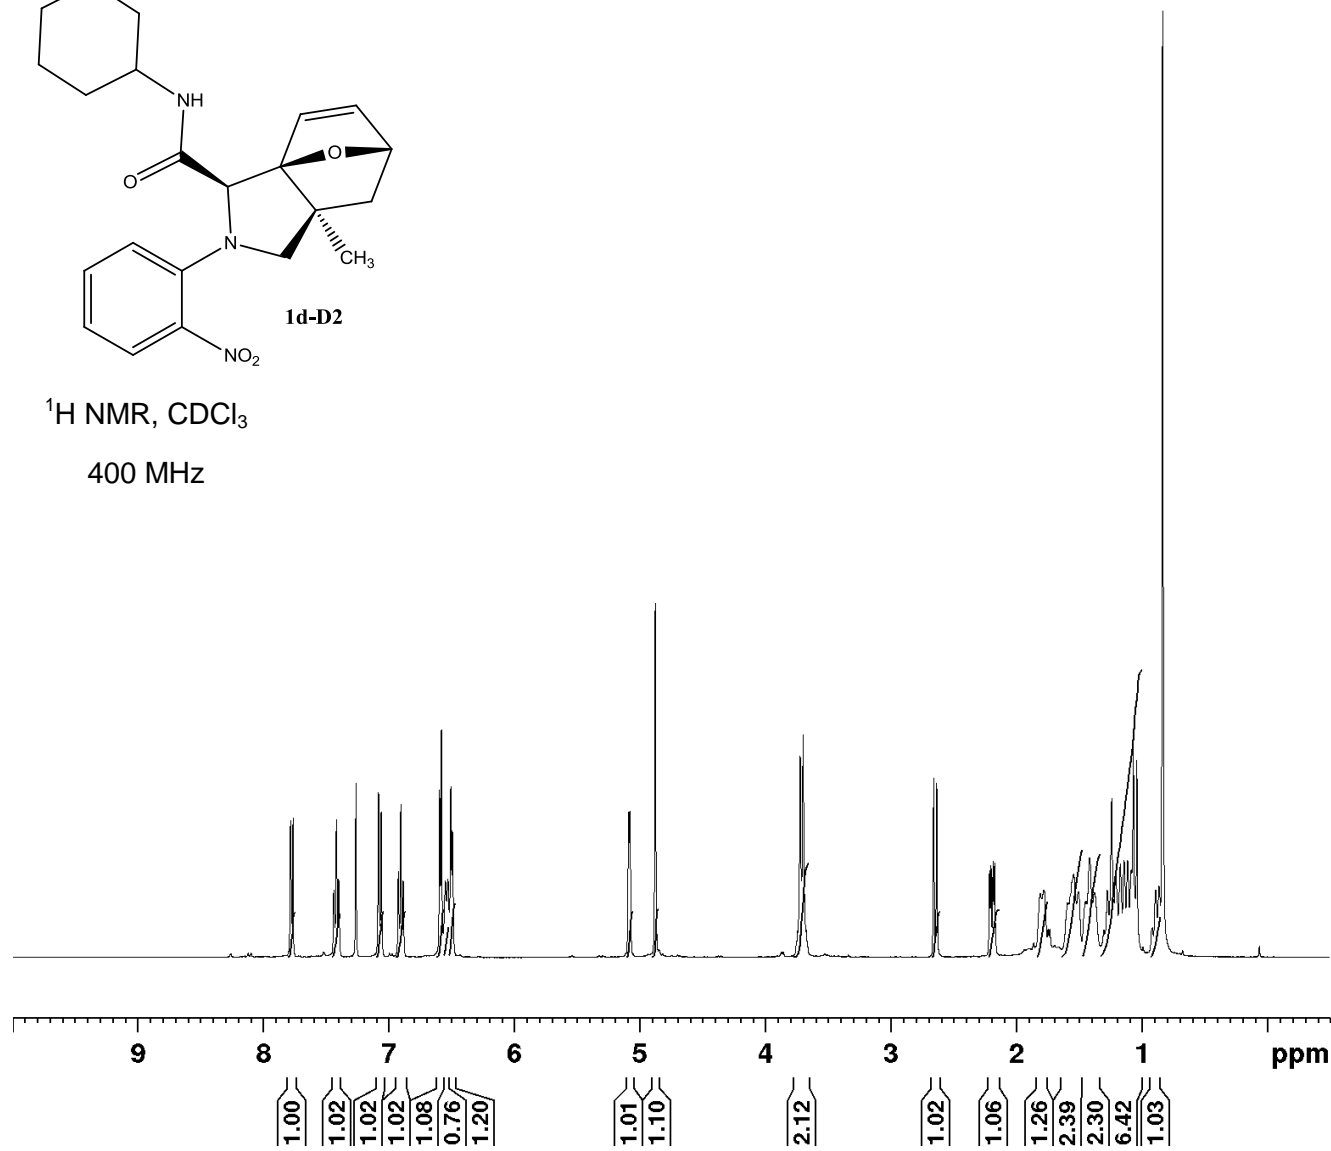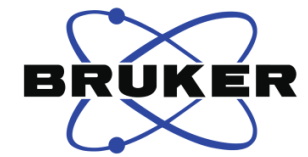

Current Data Parameters  
 NAME KM-38-F63-80-D2  
 EXPNO 10  
 PROCNO 1

F2 - Acquisition Parameters  
 Date\_ 20150512  
 Time 14.29  
 INSTRUM spect  
 PROBHD 5 mm PABBO BB/  
 PULPROG zg30  
 TD 65536  
 SOLVENT CDCl3  
 NS 16  
 DS 2  
 SWH 8012.820 Hz  
 FIDRES 0.122266 Hz  
 AQ 4.0894465 sec  
 RG 120.42  
 DW 62.400 usec  
 DE 6.50 usec  
 TE 292.4 K  
 D1 1.00000000 sec  
 TD0 1

===== CHANNEL f1 =====  
 SFO1 400.1524711 MHz  
 NUC1 1H  
 P1 15.00 usec  
 PLW1 9.80000019 W

F2 - Processing parameters  
 SI 65536  
 SF 400.1500104 MHz  
 WDW EM  
 SSB 0  
 LB 0.30 Hz  
 GB 0  
 PC 1.00

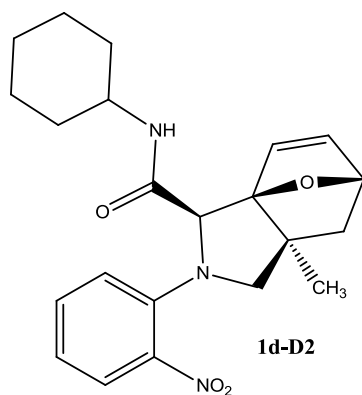

$^{13}\text{C}$  NMR,  $\text{CDCl}_3$

100 MHz

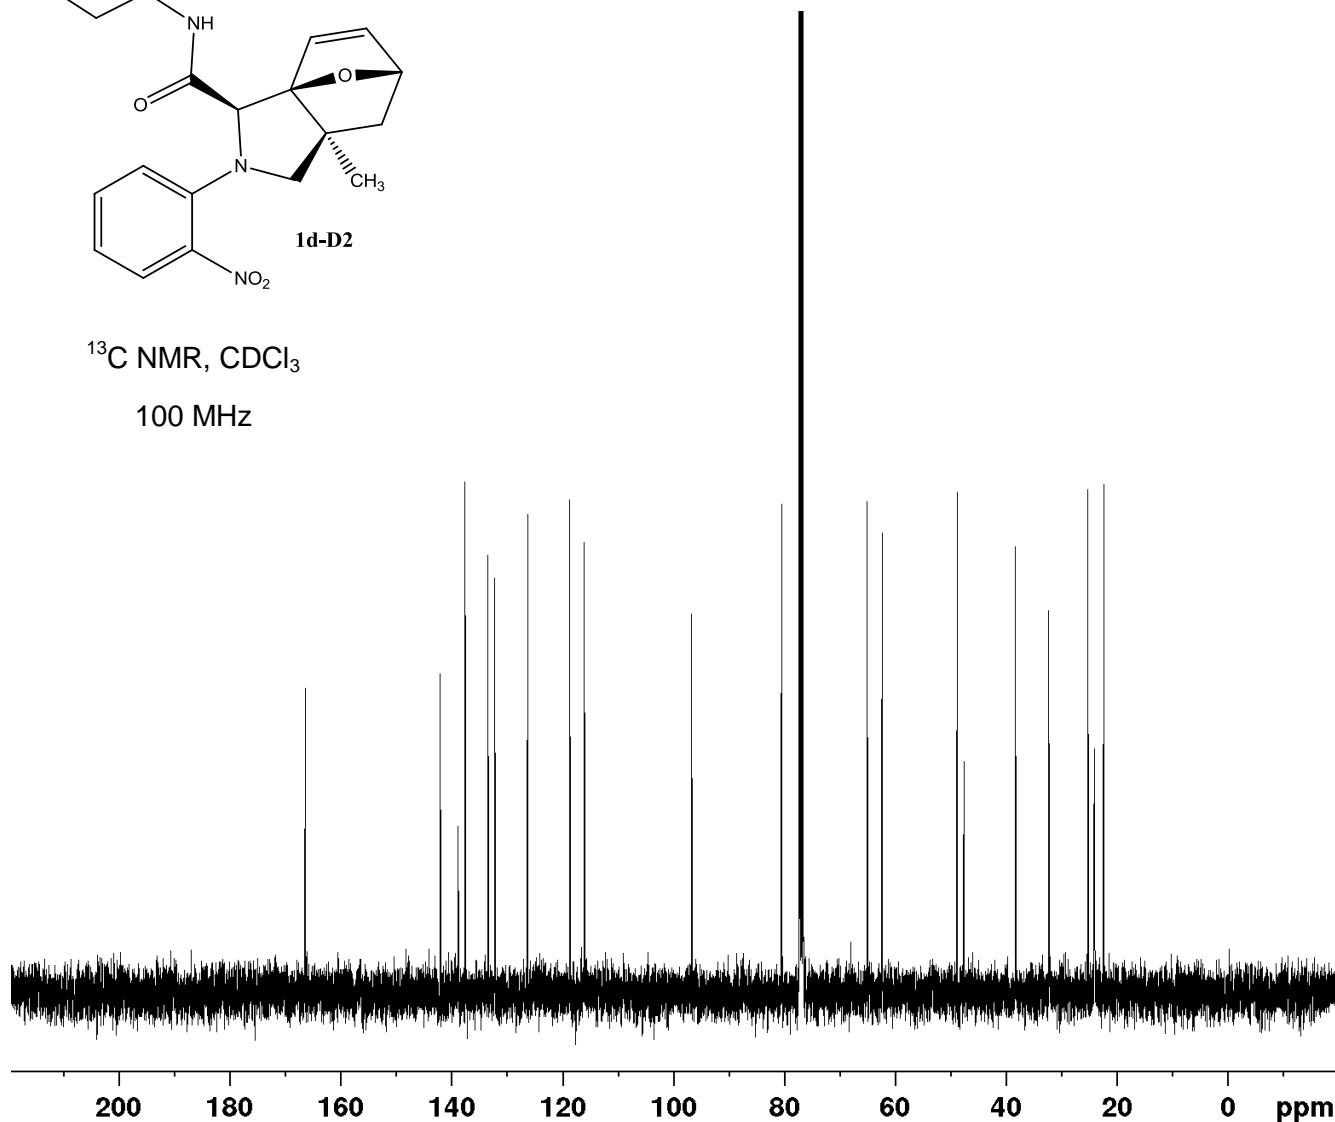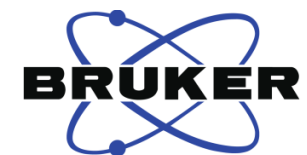

Current Data Parameters  
 NAME KM-38-F63-80-D2  
 EXPNO 20  
 PROCNO 1

F2 - Acquisition Parameters  
 Date\_ 20150512  
 Time 14.38  
 INSTRUM spect  
 PROBHD 5 mm PABBO BB/  
 PULPROG zgpg30  
 TD 65536  
 SOLVENT  $\text{CDCl}_3$   
 NS 128  
 DS 4  
 SWH 24038.461 Hz  
 FIDRES 0.366798 Hz  
 AQ 1.3631488 sec  
 RG 210.96  
 DW 20.800 usec  
 DE 10.00 usec  
 TE 293.4 K  
 D1 2.00000000 sec  
 D11 0.03000000 sec  
 TD0 1

===== CHANNEL f1 =====  
 SFO1 100.6278588 MHz  
 NUC1  $^{13}\text{C}$   
 P1 10.00 usec  
 PLW1 48.20000076 W

===== CHANNEL f2 =====  
 SFO2 400.1516006 MHz  
 NUC2  $^1\text{H}$   
 CPDPRG[2] waltz16  
 PCPD2 90.00 usec  
 PLW2 9.80000019 W  
 PLW12 0.27221999 W  
 PLW13 0.22050001 W

F2 - Processing parameters  
 SI 32768  
 SF 100.6177903 MHz  
 WDW EM  
 SSB 0  
 LB 1.00 Hz  
 GB 0  
 PC 1.40

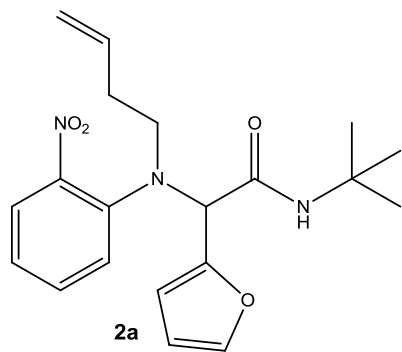

<sup>1</sup>H NMR, CDCl<sub>3</sub>

400 MHz

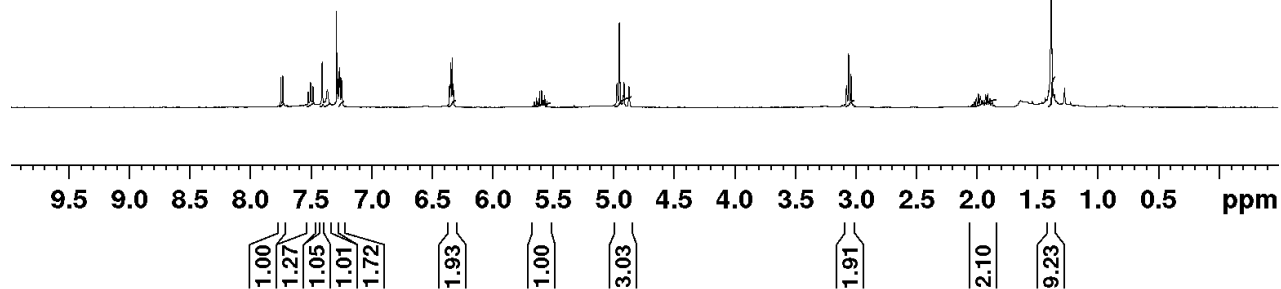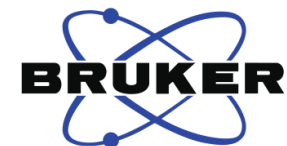

Current Data Parameters  
 NAME KM-34-F31-41-test  
 EXPNO 10  
 PROCNO 1

F2 - Acquisition Parameters  
 Date\_ 20150204  
 Time 15.13  
 INSTRUM spect  
 PROBHD 5 mm PABBO BB/  
 PULPROG zg30  
 TD 65536  
 SOLVENT CDCl3  
 NS 16  
 DS 2  
 SWH 8012.820 Hz  
 FIDRES 0.122266 Hz  
 AQ 4.0894465 sec  
 RG 134.4  
 DW 62.400 usec  
 DE 6.50 usec  
 TE 293.6 K  
 D1 1.00000000 sec  
 TDO 1

===== CHANNEL f1 =====  
 SFO1 400.1524711 MHz  
 NUC1 1H  
 P1 15.00 usec  
 PLW1 9.80000019 W

F2 - Processing parameters  
 SI 65536  
 SF 400.1500000 MHz  
 WDW EM  
 SSB 0  
 LB 0.30 Hz  
 GB 0  
 PC 1.00

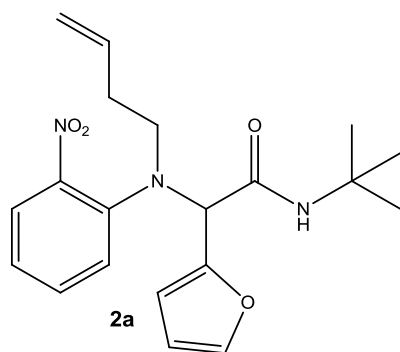

$^{13}\text{C}$  NMR,  $\text{CDCl}_3$   
100 MHz

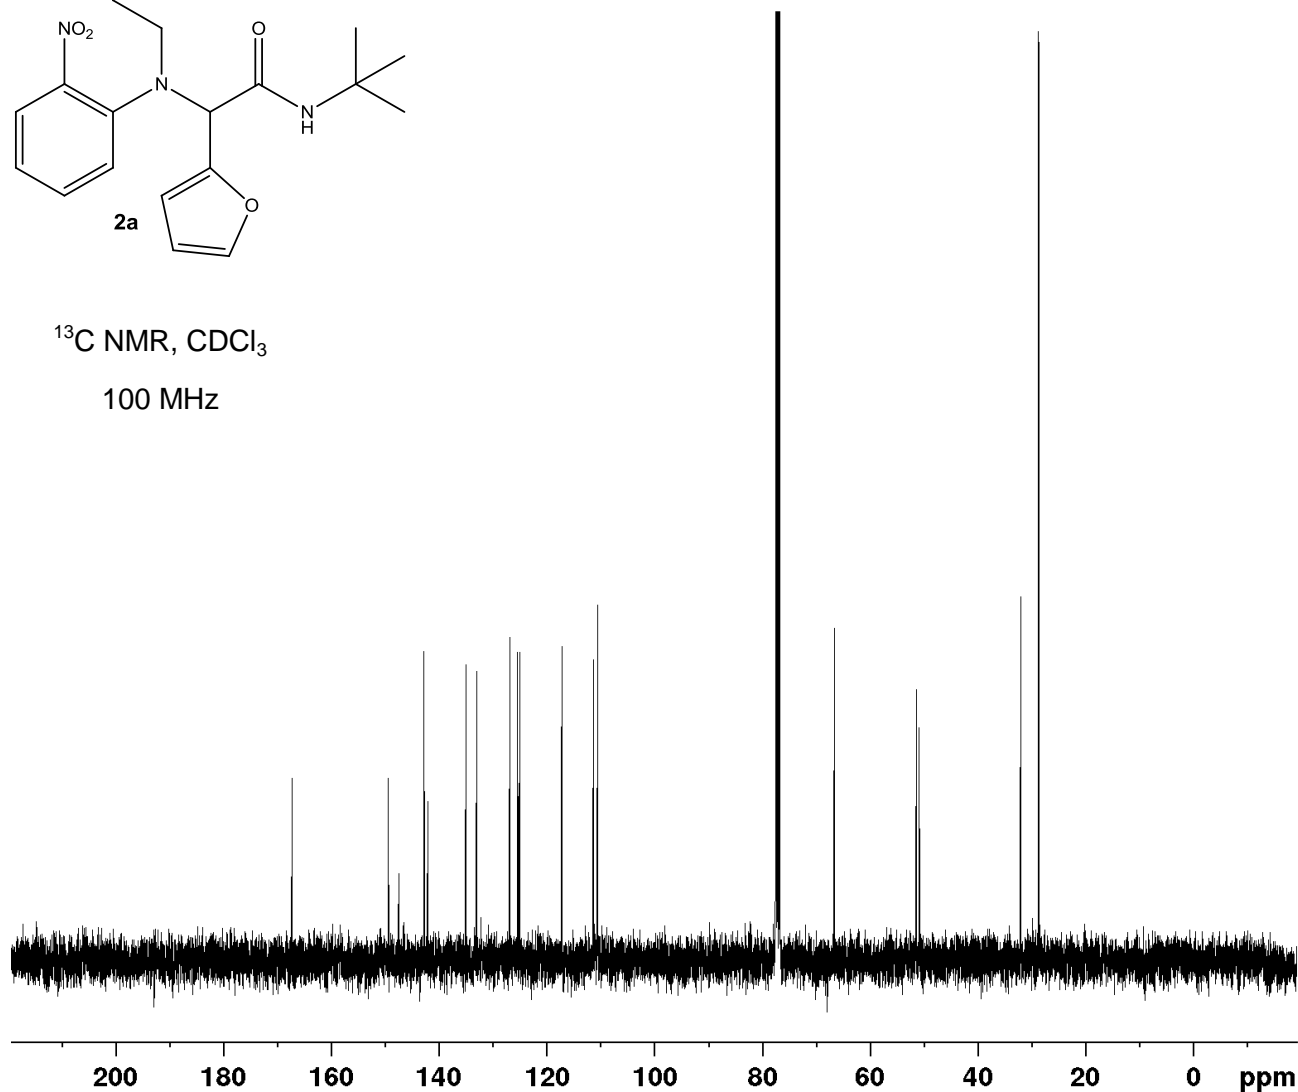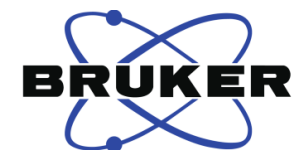

Current Data Parameters  
NAME KM-34-F31-41-C  
EXPNO 10  
PROCNO 1

F2 - Acquisition Parameters  
Date\_ 20150202  
Time 10.39  
INSTRUM spect  
PROBHD 5 mm PABBO BB/  
PULPROG zgpg30  
TD 65536  
SOLVENT  $\text{CDCl}_3$   
NS 128  
DS 4  
SWH 24038.461 Hz  
FIDRES 0.366798 Hz  
AQ 1.3631488 sec  
RG 210.96  
DW 20.800 usec  
DE 10.00 usec  
TE 294.7 K  
D1 2.00000000 sec  
D11 0.03000000 sec  
TD0 1

===== CHANNEL f1 =====  
SFO1 100.6278588 MHz  
NUC1  $^{13}\text{C}$   
P1 10.00 usec  
PLW1 48.20000076 W

===== CHANNEL f2 =====  
SFO2 400.1516006 MHz  
NUC2  $^1\text{H}$   
CPDPRG[2] waltz16  
PCPD2 90.00 usec  
PLW2 9.80000019 W  
PLW12 0.27221999 W  
PLW13 0.22050001 W

F2 - Processing parameters  
SI 32768  
SF 100.6177859 MHz  
WDW EM  
SSB 0  
LB 1.00 Hz  
GB 0  
PC 1.40

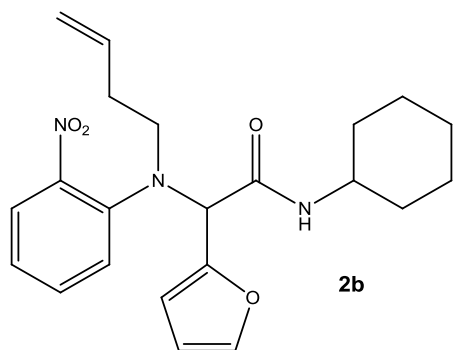

$^1\text{H NMR}$ ,  $\text{CDCl}_3$   
400 MHz

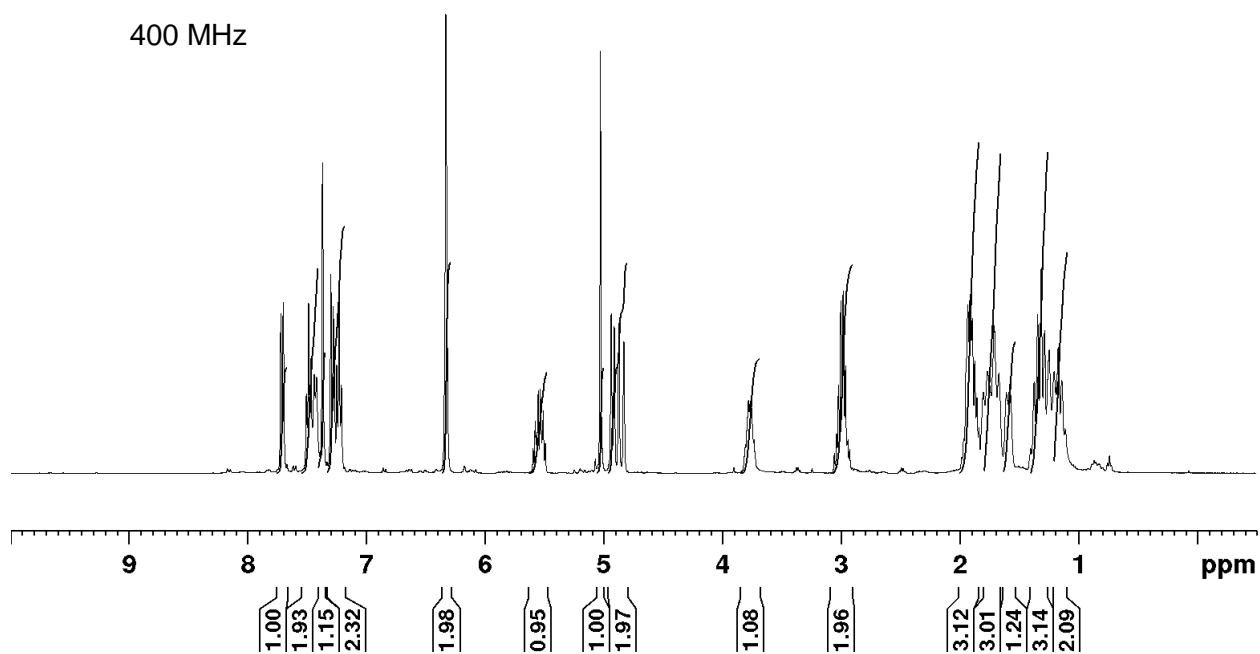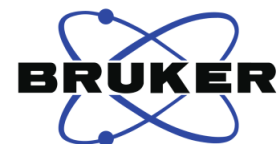

Current Data Parameters  
NAME MM-2-70  
EXPNO 1  
PROCNO 1

F2 - Acquisition Parameters  
Date\_ 20160307  
Time 20.28  
INSTRUM spect  
PROBHD 5 mm PABBO BB/  
PULPROG zg30  
TD 65536  
SOLVENT CDCl3  
NS 16  
DS 2  
SWH 8012.820 Hz  
FIDRES 0.122266 Hz  
AQ 4.0894465 sec  
RG 75.54  
DW 62.400 usec  
DE 6.50 usec  
TE 296.1 K  
D1 1.00000000 sec  
TD0 1

===== CHANNEL f1 =====  
SF01 400.1524711 MHz  
NUC1 1H  
P1 15.00 usec  
PLW1 9.80000019 W

F2 - Processing parameters  
SI 65536  
SF 400.1500081 MHz  
WDW EM  
SSB 0  
LB 0.30 Hz  
GB 0  
PC 1.00



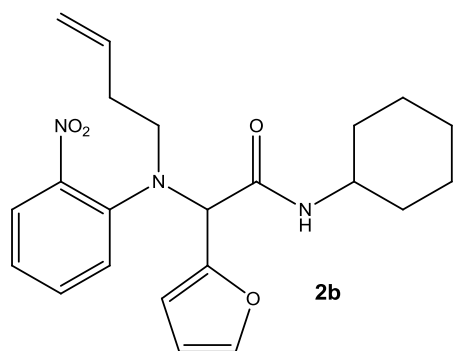

$^{13}\text{C}$  NMR,  $\text{CDCl}_3$   
100 MHz

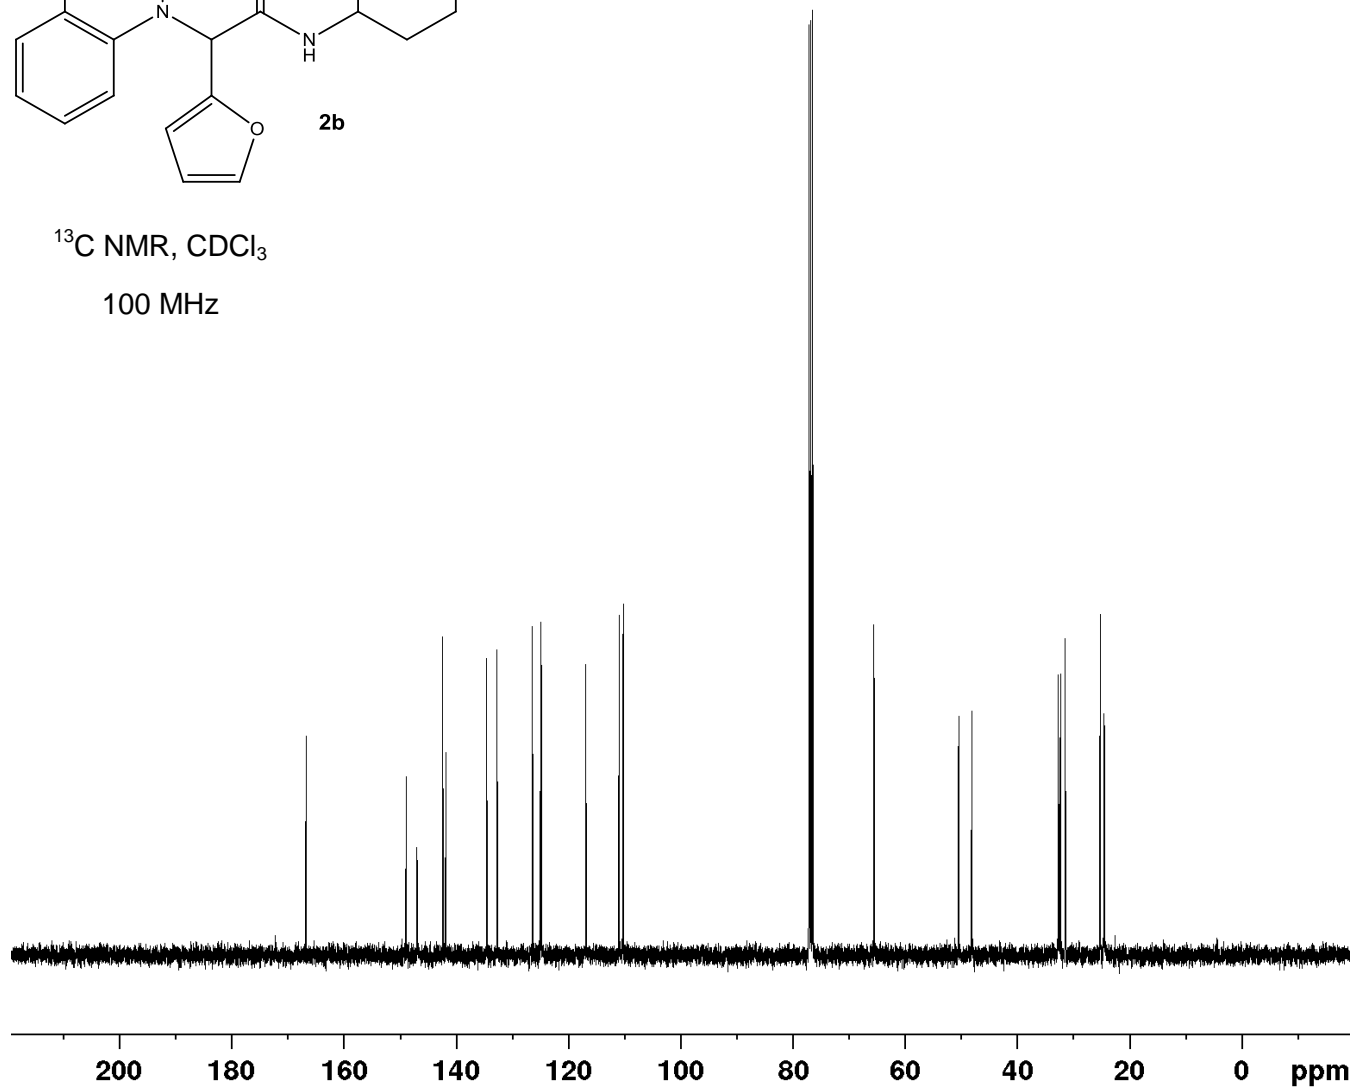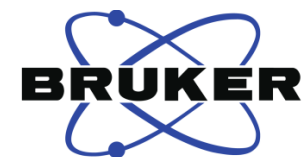

Current Data Parameters  
NAME MM-2-70  
EXPNO 2  
PROCNO 1

F2 - Acquisition Parameters  
Date\_ 20160307  
Time 20.36  
INSTRUM spect  
PROBHD 5 mm PABBO BB/  
PULPROG zgpg30  
TD 65536  
SOLVENT  $\text{CDCl}_3$   
NS 128  
DS 4  
SWH 24038.461 Hz  
FIDRES 0.366798 Hz  
AQ 1.3631488 sec  
RG 210.96  
DW 20.800 usec  
DE 10.00 usec  
TE 297.1 K  
D1 2.00000000 sec  
D11 0.03000000 sec  
TD0 1

===== CHANNEL f1 =====  
SFO1 100.6278588 MHz  
NUC1  $^{13}\text{C}$   
P1 10.00 usec  
PLW1 48.20000076 W

===== CHANNEL f2 =====  
SFO2 400.1516006 MHz  
NUC2  $^1\text{H}$   
CPDPRG[2] waltz16  
PCPD2 90.00 usec  
PLW2 9.80000019 W  
PLW12 0.27221999 W  
PLW13 0.22050001 W

F2 - Processing parameters  
SI 32768  
SF 100.6178041 MHz  
WDW EM  
SSB 0  
LB 1.00 Hz  
GB 0  
PC 1.40

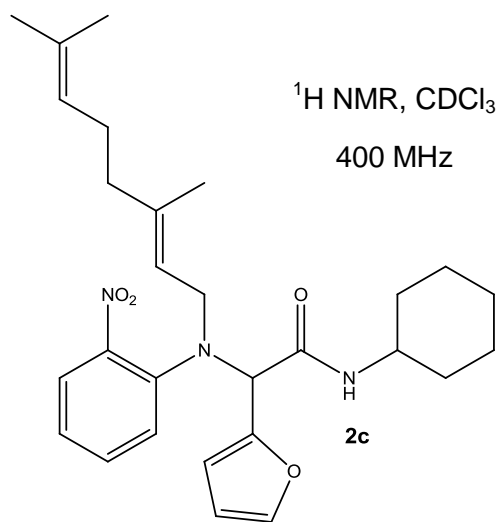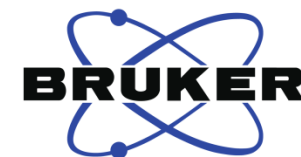

Current Data Parameters  
 NAME MM-2-63  
 EXPNO 1  
 PROCNO 1

F2 - Acquisition Parameters  
 Date\_ 20160307  
 Time 20.14  
 INSTRUM spect  
 PROBHD 5 mm PABBO BB/  
 PULPROG zg30  
 TD 65536  
 SOLVENT CDCl3  
 NS 16  
 DS 2  
 SWH 8012.820 Hz  
 FIDRES 0.122266 Hz  
 AQ 4.0894465 sec  
 RG 120.42  
 DW 62.400 usec  
 DE 6.50 usec  
 TE 295.9 K  
 D1 1.00000000 sec  
 TD0 1

===== CHANNEL f1 =====  
 SFO1 400.1524711 MHz  
 NUC1 1H  
 P1 15.00 usec  
 PLW1 9.80000019 W

F2 - Processing parameters  
 SI 65536  
 SF 400.1500122 MHz  
 WDW EM  
 SSB 0  
 LB 0.30 Hz  
 GB 0  
 PC 1.00

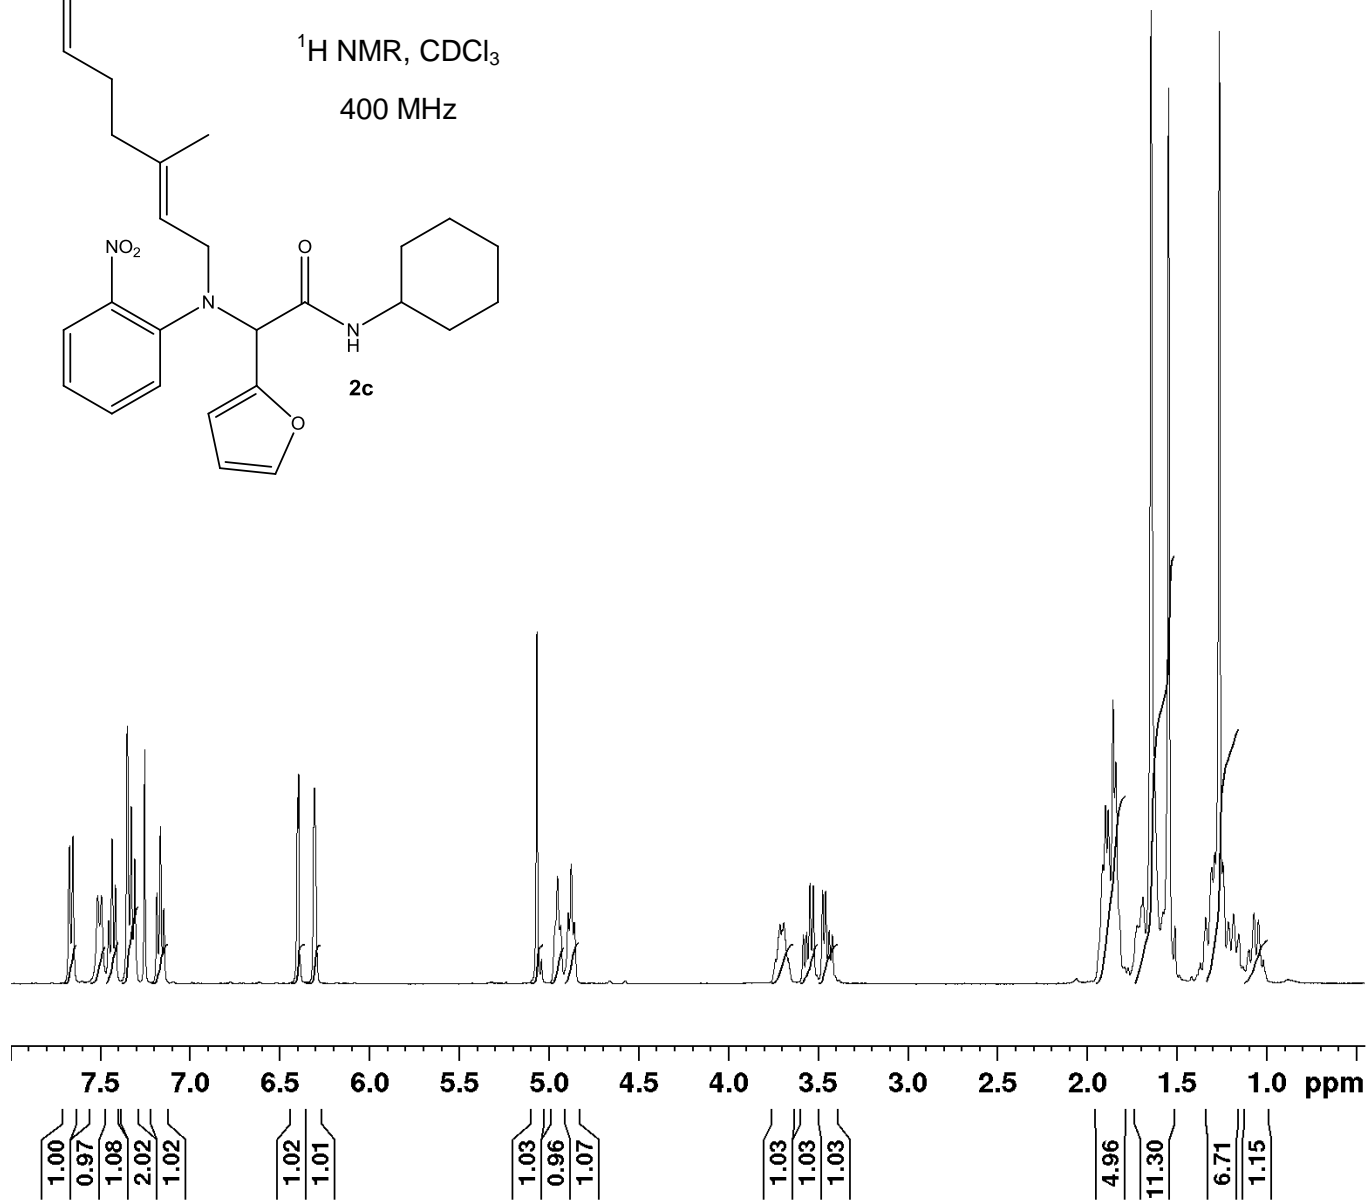

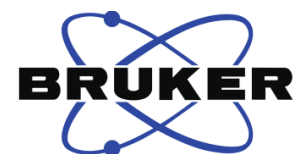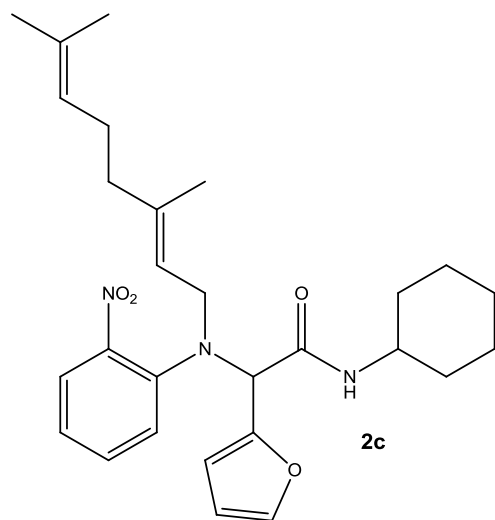

<sup>13</sup>C NMR, CDCl<sub>3</sub>  
100 MHz

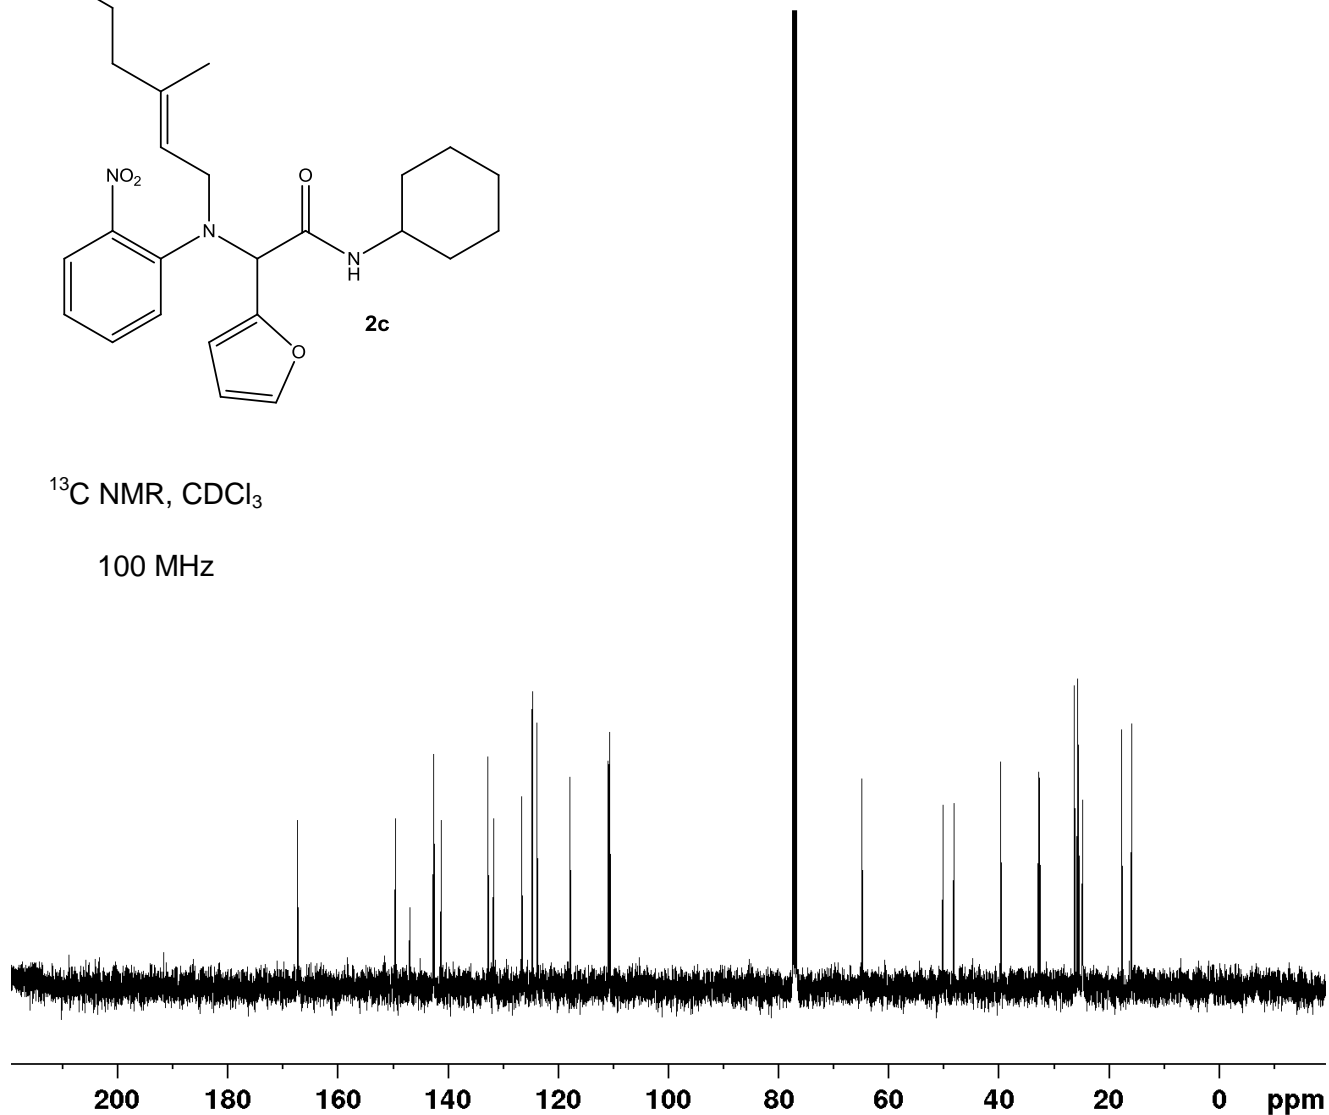

Current Data Parameters  
NAME MM-2-63  
EXPNO 2  
PROCNO 1

F2 - Acquisition Parameters  
Date\_ 20160307  
Time 20.23  
INSTRUM spect  
PROBHD 5 mm PABBO BB/  
PULPROG zgpg30  
TD 65536  
SOLVENT CDCl3  
NS 128  
DS 4  
SWH 24038.461 Hz  
FIDRES 0.366798 Hz  
AQ 1.3631488 sec  
RG 210.96  
DW 20.800 usec  
DE 10.00 usec  
TE 297.0 K  
D1 2.00000000 sec  
D11 0.03000000 sec  
TD0 1

=====  
CHANNEL f1  
SFO1 100.6278588 MHz  
NUC1 13C  
P1 10.00 usec  
PLW1 48.20000076 W

=====  
CHANNEL f2  
SFO2 400.1516006 MHz  
NUC2 1H  
CPDPRG[2] waltz16  
PCPD2 90.00 usec  
PLW2 9.80000019 W  
PLW12 0.27221999 W  
PLW13 0.22050001 W

F2 - Processing parameters  
SI 32768  
SF 100.6177919 MHz  
WDW EM  
SSB 0  
LB 1.00 Hz  
GB 0  
PC 1.40

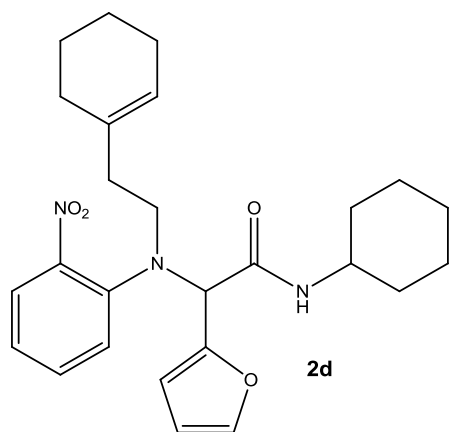

<sup>1</sup>H NMR, CDCl<sub>3</sub>  
400 MHz

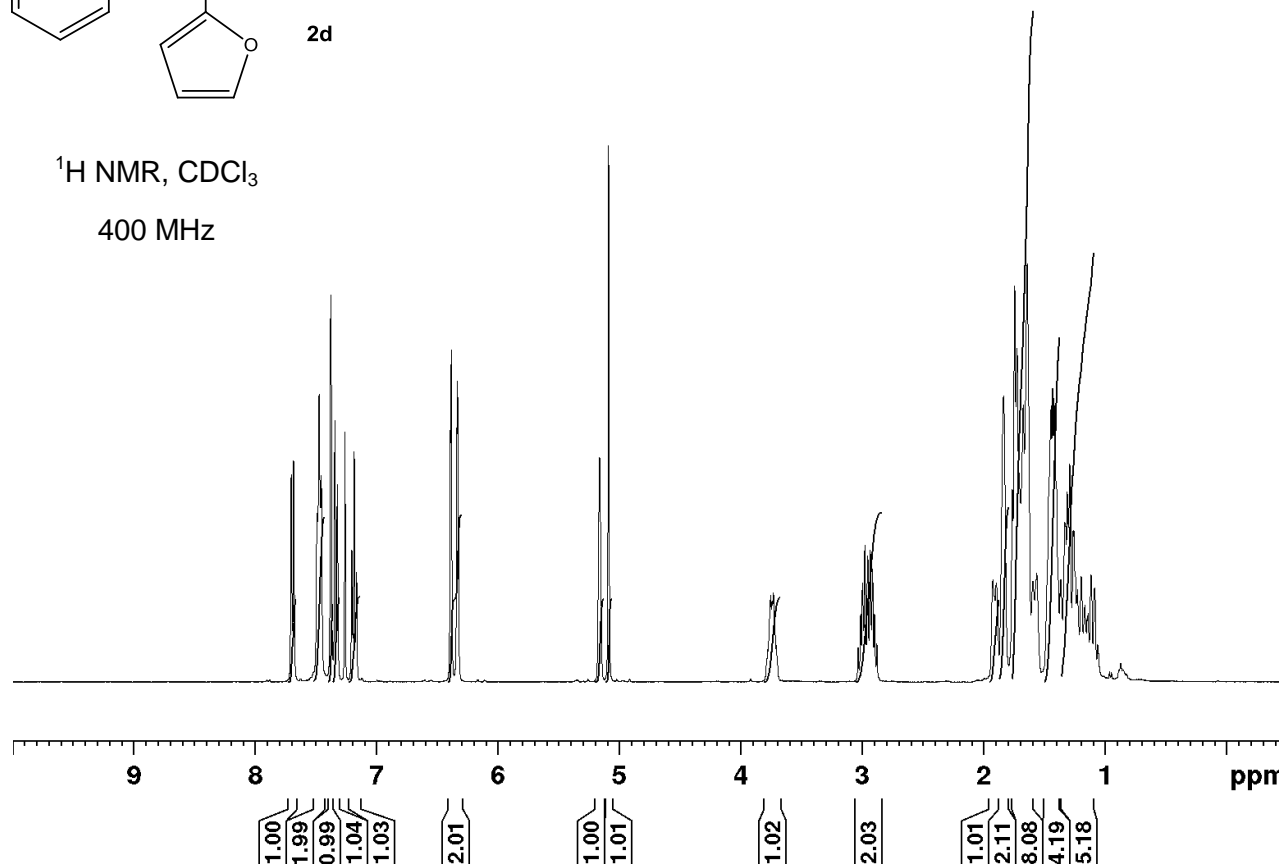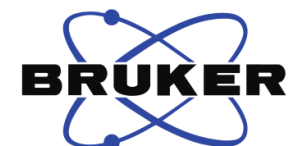

Current Data Parameters  
NAME MM-2-64  
EXPNO 1  
PROCNO 1

F2 - Acquisition Parameters  
Date\_ 20160309  
Time 11.31  
INSTRUM spect  
PROBHD 5 mm PABBO BB/  
PULPROG zg30  
TD 65536  
SOLVENT CDCl3  
NS 16  
DS 2  
SWH 8012.820 Hz  
FIDRES 0.122266 Hz  
AQ 4.0894465 sec  
RG 105.13  
DW 62.400 usec  
DE 6.50 usec  
TE 293.9 K  
D1 1.00000000 sec  
TD0 1

===== CHANNEL f1 =====  
SFO1 400.1524711 MHz  
NUC1 1H  
P1 15.00 usec  
PLW1 9.80000019 W

F2 - Processing parameters  
SI 65536  
SF 400.1500112 MHz  
WDW EM  
SSB 0  
LB 0.30 Hz  
GB 0  
PC 1.00

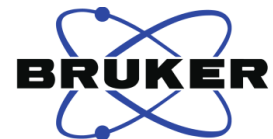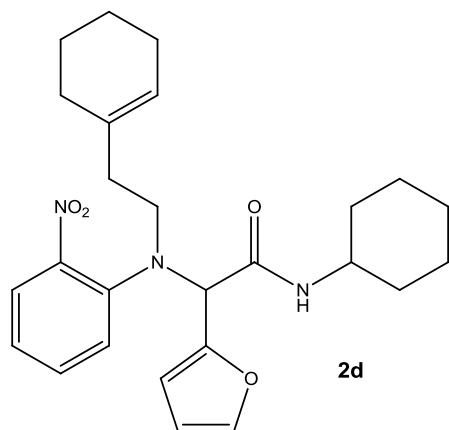

<sup>13</sup>C NMR, CDCl<sub>3</sub>

100 MHz

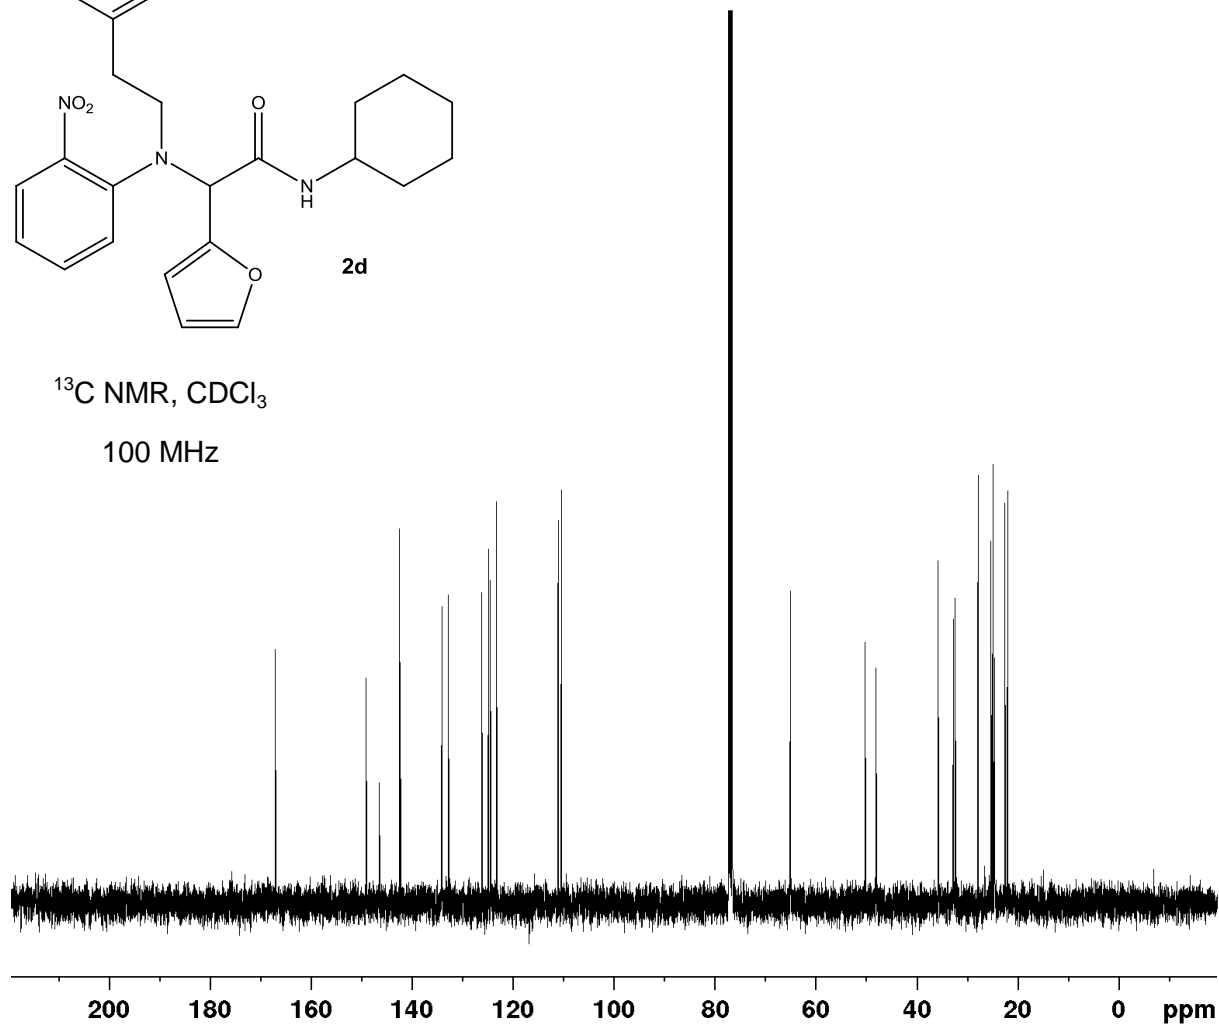

Current Data Parameters  
NAME MM-2-64  
EXPNO 2  
PROCNO 1

F2 - Acquisition Parameters  
Date\_ 20160309  
Time 11.40  
INSTRUM spect  
PROBHD 5 mm PABBO BB/  
PULPROG zgpg30  
TD 65536  
SOLVENT CDCl3  
NS 128  
DS 4  
SWH 24038.461 Hz  
FIDRES 0.366798 Hz  
AQ 1.3631488 sec  
RG 210.96  
DW 20.800 usec  
DE 10.00 usec  
TE 295.0 K  
D1 2.00000000 sec  
D11 0.03000000 sec  
TD0 1

===== CHANNEL f1 =====  
SFO1 100.6278588 MHz  
NUC1 13C  
P1 10.00 usec  
PLW1 48.20000076 W

===== CHANNEL f2 =====  
SFO2 400.1516006 MHz  
NUC2 1H  
CPDPRG[2] waltz16  
PCPD2 90.00 usec  
PLW2 9.80000019 W  
PLW12 0.27221999 W  
PLW13 0.22050001 W

F2 - Processing parameters  
SI 32768  
SF 100.6177941 MHz  
WDW EM  
SSB 0  
LB 1.00 Hz  
GB 0  
PC 1.40

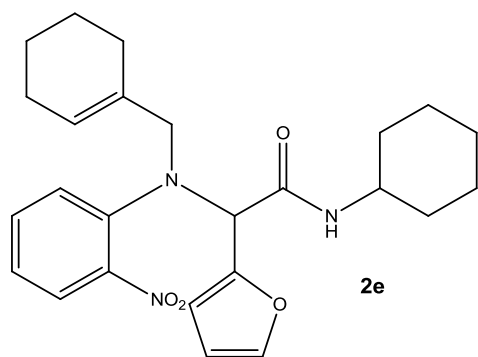

<sup>1</sup>H NMR, CDCl<sub>3</sub>

400 MHz

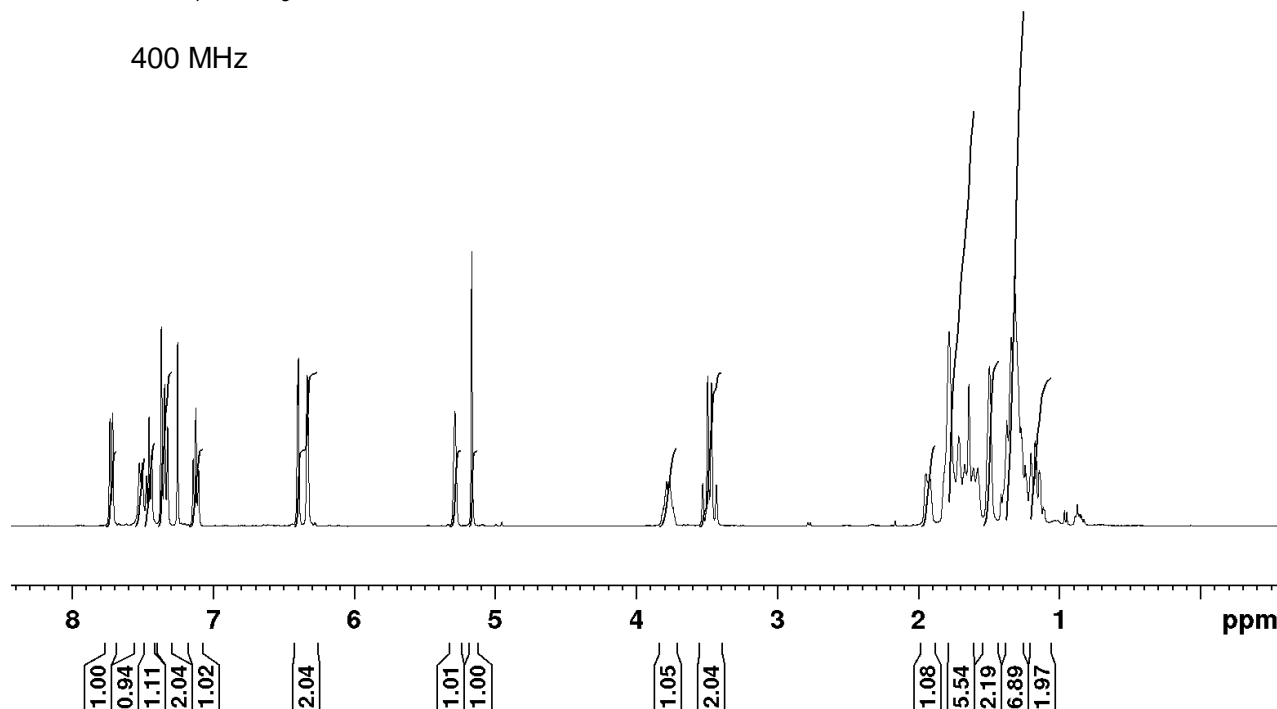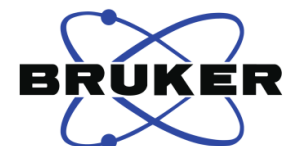

Current Data Parameters  
 NAME MM-2-79  
 EXPNO 1  
 PROCNO 1

F2 - Acquisition Parameters  
 Date\_ 20160308  
 Time 15.17  
 INSTRUM spect  
 PROBHD 5 mm PABBO BB/  
 PULPROG zg30  
 TD 65536  
 SOLVENT CDCl3  
 NS 16  
 DS 2  
 SWH 8012.820 Hz  
 FIDRES 0.122266 Hz  
 AQ 4.0894465 sec  
 RG 134.4  
 DW 62.400 usec  
 DE 6.50 usec  
 TE 293.9 K  
 D1 1.00000000 sec  
 TDO 1

===== CHANNEL f1 =====  
 SFO1 400.1524711 MHz  
 NUC1 1H  
 P1 15.00 usec  
 PLW1 9.80000019 W

F2 - Processing parameters  
 SI 65536  
 SF 400.1500119 MHz  
 WDW EM  
 SSB 0  
 LB 0.30 Hz  
 GB 0  
 PC 1.00

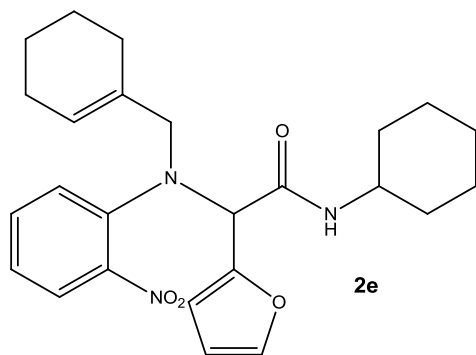

$^{13}\text{C}$  NMR,  $\text{CDCl}_3$

100 MHz

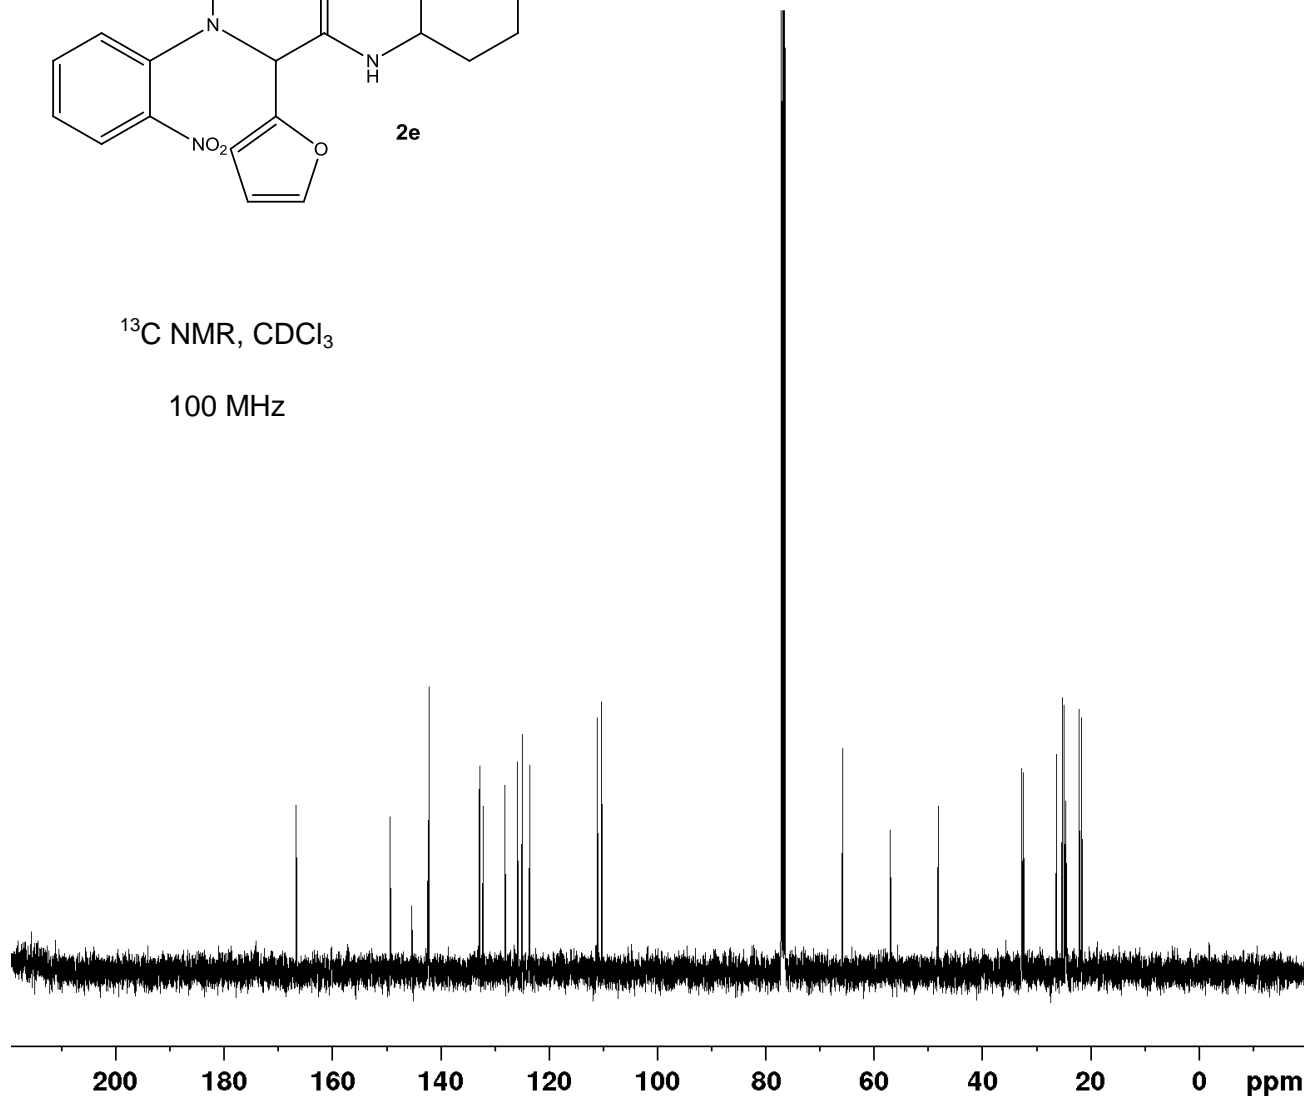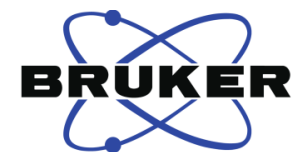

Current Data Parameters  
 NAME MM-2-79  
 EXPNO 2  
 PROCNO 1

F2 - Acquisition Parameters  
 Date\_ 20160308  
 Time 15.26  
 INSTRUM spect  
 PROBHD 5 mm PABBO BB/  
 PULPROG zgpg30  
 TD 65536  
 SOLVENT  $\text{CDCl}_3$   
 NS 128  
 DS 4  
 SWH 24038.461 Hz  
 FIDRES 0.366798 Hz  
 AQ 1.3631488 sec  
 RG 210.96  
 DW 20.800 usec  
 DE 10.00 usec  
 TE 294.9 K  
 D1 2.00000000 sec  
 D11 0.03000000 sec  
 TDO 1

===== CHANNEL f1 =====  
 SFO1 100.6278588 MHz  
 NUC1 13C  
 P1 10.00 usec  
 PLW1 48.20000076 W

===== CHANNEL f2 =====  
 SFO2 400.1516006 MHz  
 NUC2 1H  
 CPDPRG[2] waltz16  
 PCPD2 90.00 usec  
 PLW2 9.80000019 W  
 PLW12 0.27221999 W  
 PLW13 0.22050001 W

F2 - Processing parameters  
 SI 32768  
 SF 100.6178041 MHz  
 WDW EM  
 SSB 0  
 LB 1.00 Hz  
 GB 0  
 PC 1.40

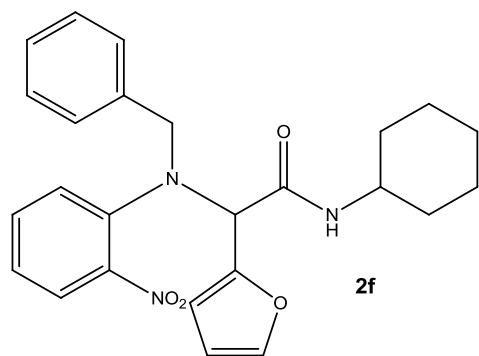

<sup>1</sup>H NMR, CDCl<sub>3</sub>

400 MHz

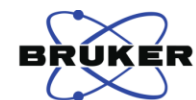

Current Data Parameters  
 NAME a4 good  
 EXPNO 1  
 PROCNO 1

F2 - Acquisition Parameters  
 Date\_ 20160710  
 Time 14.36  
 INSTRUM spect  
 PROBHD 5 mm FAPBO BB/  
 PULPROG zg30  
 TD 65536  
 SOLVENT CDCl3  
 NS 16  
 DS 2  
 SWH 8012.820 Hz  
 FIDRES 0.122266 Hz  
 AQ 4.0894465 sec  
 RG 134.4  
 DW 62.400 usec  
 DE 6.50 usec  
 TE 294.2 K  
 D1 1.0000000 sec  
 TDO 1

----- CHANNEL f1 -----  
 SFO1 400.1524711 MHz  
 NUC1 1H  
 P1 15.00 usec  
 PLW1 9.80000019 W

F2 - Processing parameters  
 SI 65536  
 SF 400.1500106 MHz  
 WDW EM  
 SSB 0  
 LB 0.30 Hz  
 GB 0  
 PC 1.00

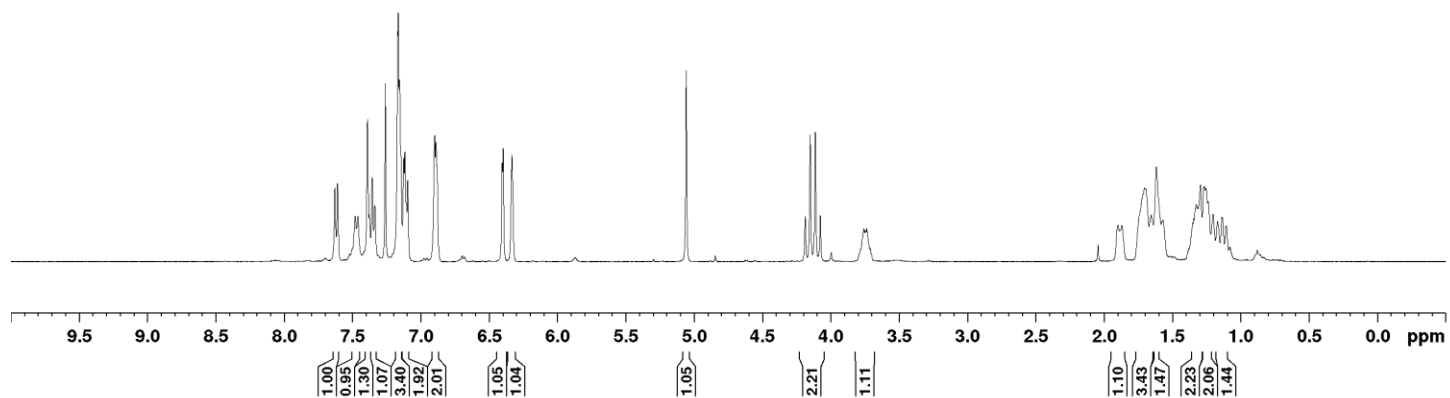



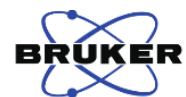

Current Data Parameters  
NAME ad carbon  
EXPNO 1  
PROCNO 1

F2 Acquisition Parameters  
Date\_ 20160710  
Time 23.39  
INSTRUM spect  
PROBHD 5 mm PABBO 5B7  
PULPROG zgpg30  
TD 65536  
SOLVENT CDCl3  
NS 256  
DS 4  
SWH 24038.461 Hz  
FIDRES 0.366798 Hz  
AQ 1.3631488 sec  
RG 210.96  
BW 20.800 usec  
DE 10.00 usec  
TE 293.4 K  
D1 2.0000000 sec  
D11 0.0300000 sec  
TD0 1

===== CHANNEL f1 =====  
SFO1 100.6278588 MHz  
NUC1 13C  
P1 10.00 usec  
PLW1 48.20000076 W

===== CHANNEL f2 =====  
SFO2 400.1516006 MHz  
NUC2 1H  
PULPROG2 waltz16  
PCPD2 80.00 usec  
PLW2 9.80000019 W  
PLW12 0.27221999 W  
PLW13 0.22030001 W

F2 Processing parameters  
SI 32768  
SF 100.6177879 MHz  
WDW RM  
SSB 0  
LB 1.00 Hz  
GB 0  
PC 1.40

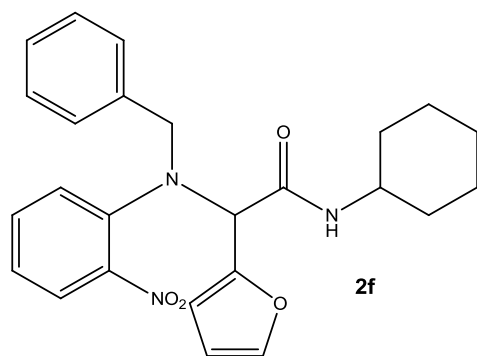

$^{13}\text{C}$  NMR,  $\text{CDCl}_3$

100 MHz

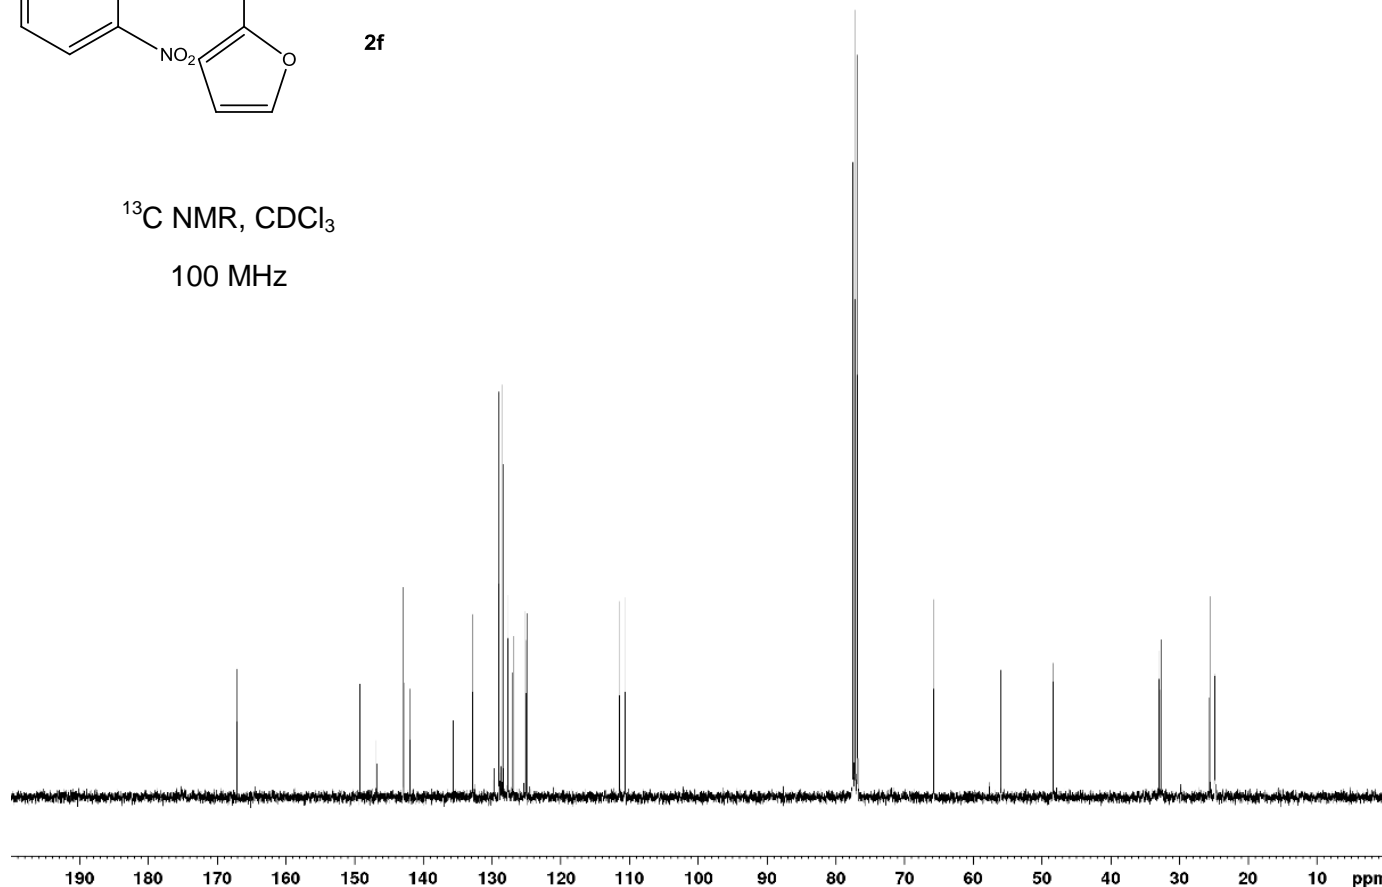

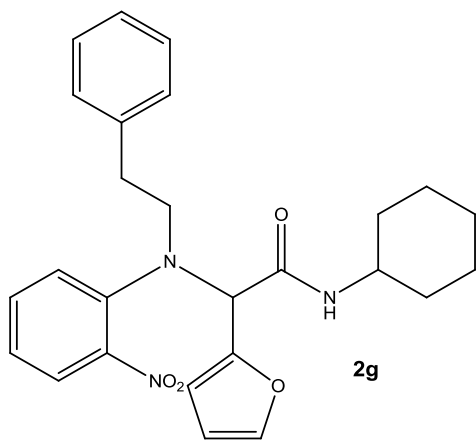

$^1\text{H NMR}$ ,  $\text{CDCl}_3$

400 MHz

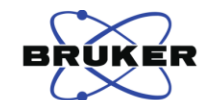

Current Data Parameters  
 NAME al good  
 EXPNO 1  
 PROCNO 1

F2 - Acquisition Parameters  
 Date\_ 20160710  
 Time 14.31  
 INSTRUM spect  
 PROBHD 5 mm PABBO BB/  
 PULPROG zg30  
 TD 65536  
 SOLVENT CDCl3  
 NS 16  
 DS 2  
 SWH 8012.820 Hz  
 FIDRES 0.122266 Hz  
 AQ 4.0894465 sec  
 RG 134.4  
 DW 62.400 usec  
 DE 6.50 usec  
 TE 294.2 K  
 D1 1.00000000 sec  
 TD0 1

===== CHANNEL f1 =====  
 SFO1 400.1524711 MHz  
 NUC1 1H  
 P1 15.00 usec  
 PLW1 9.80000019 W

F2 - Processing parameters  
 SI 65536  
 SF 400.1500109 MHz  
 WDW EM  
 SSB 0  
 LB 0.30 Hz  
 GB 0  
 PC 1.00

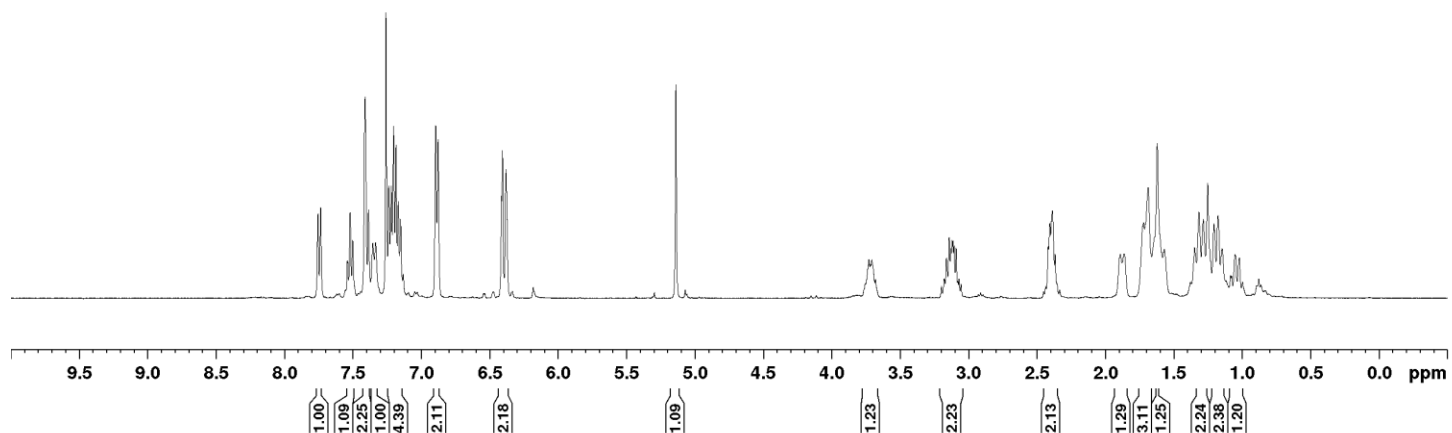

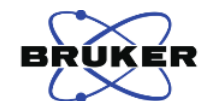

Current Data Parameters  
NAME al-Carbon  
EXPNO 1  
PROCNO 1

F2 Acquisition Parameters  
Date\_ 20160711  
Time 16.03  
INSTRUM spect  
PROBHD 5 mm PARR0 61/  
PULPROG zgpg30  
TD 65536  
SOLVENT CDCl3  
NS 128  
DS 4  
SWH 24038.461 Hz  
FIDRES 0.366798 Hz  
AQ 1.3631488 sec  
RG 210.96  
BW 20.800 usec  
BE 10.00 usec  
TE 293.3 K  
E1 2.0000000 sec  
E11 0.0300000 sec  
TD0 1

===== CHANNEL #1 =====  
SFO1 100.6278588 MHz  
NUC1 13C  
P1 10.00 usec  
PLW1 48.20000076 W

===== CHANNEL #2 =====  
SFO2 400.1516006 MHz  
NUC2 1H  
PCPDPRG12 waltz16  
PCPD2 80.00 usec  
PLW2 9.80000019 W  
PLW12 0.27221999 W  
PLW13 0.22030001 W

F2 Processing parameters  
SI 32768  
SF 100.6177906 MHz  
WDW EM  
SSB 0  
LB 1.00 Hz  
GB 0  
PC 1.40

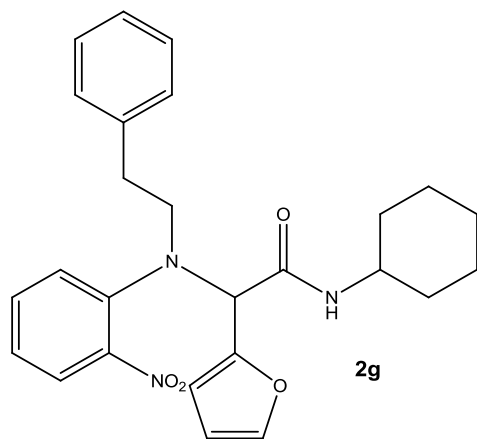

<sup>13</sup>C NMR, CDCl<sub>3</sub>  
100 MHz

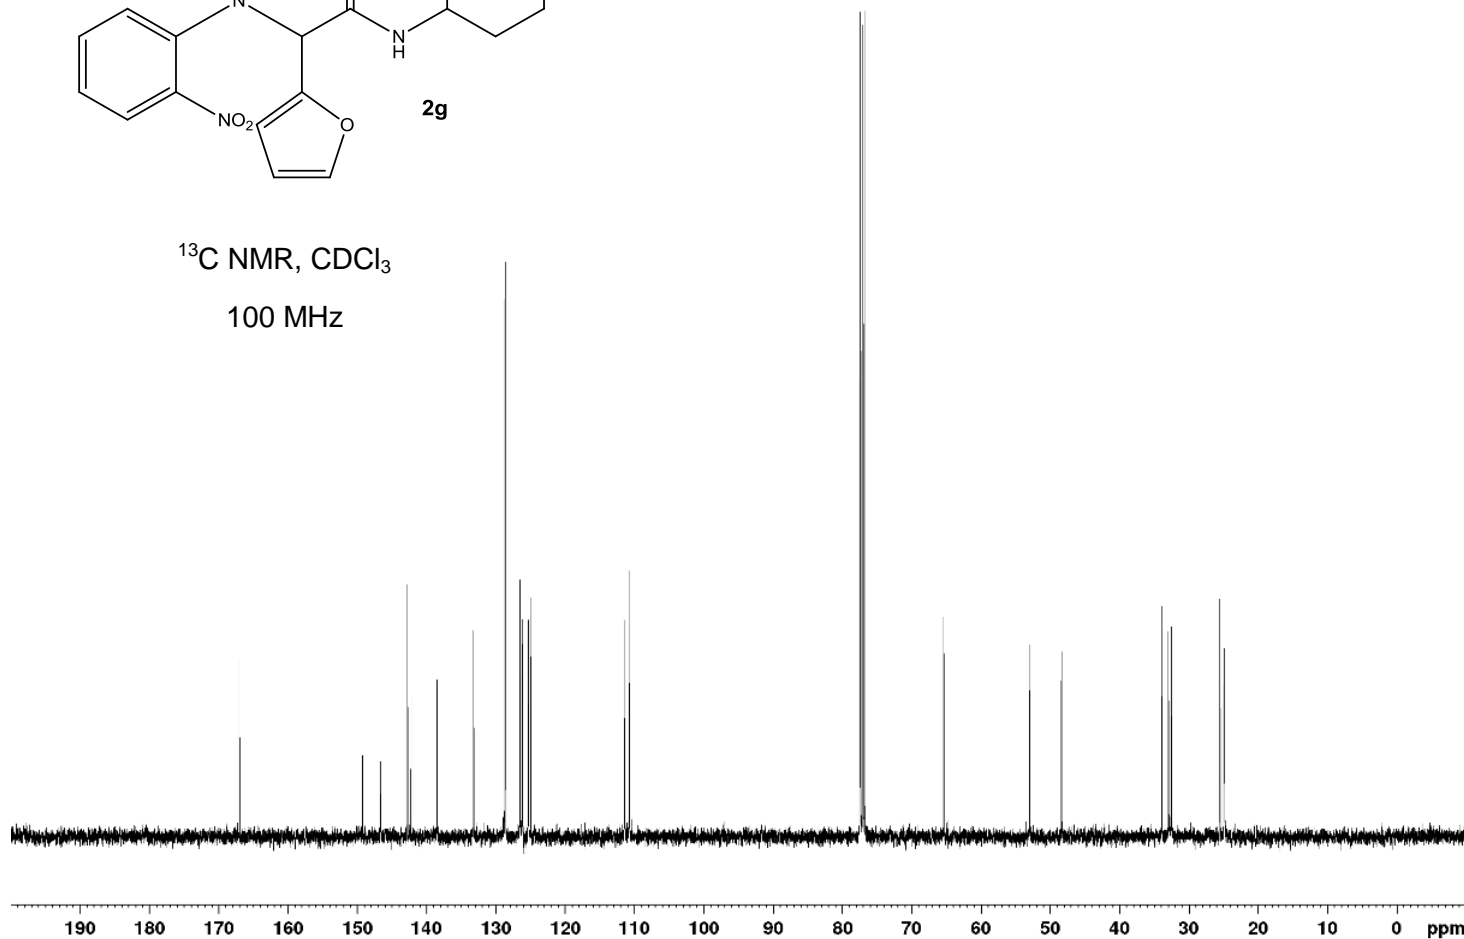

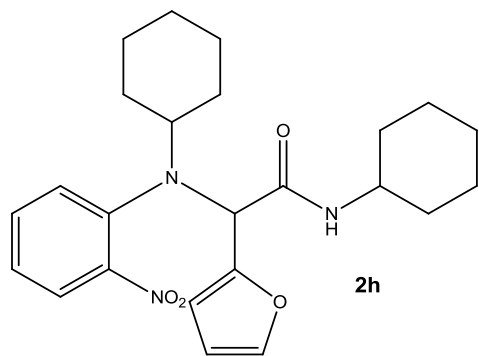

<sup>1</sup>H NMR, CDCl<sub>3</sub>

400 MHz

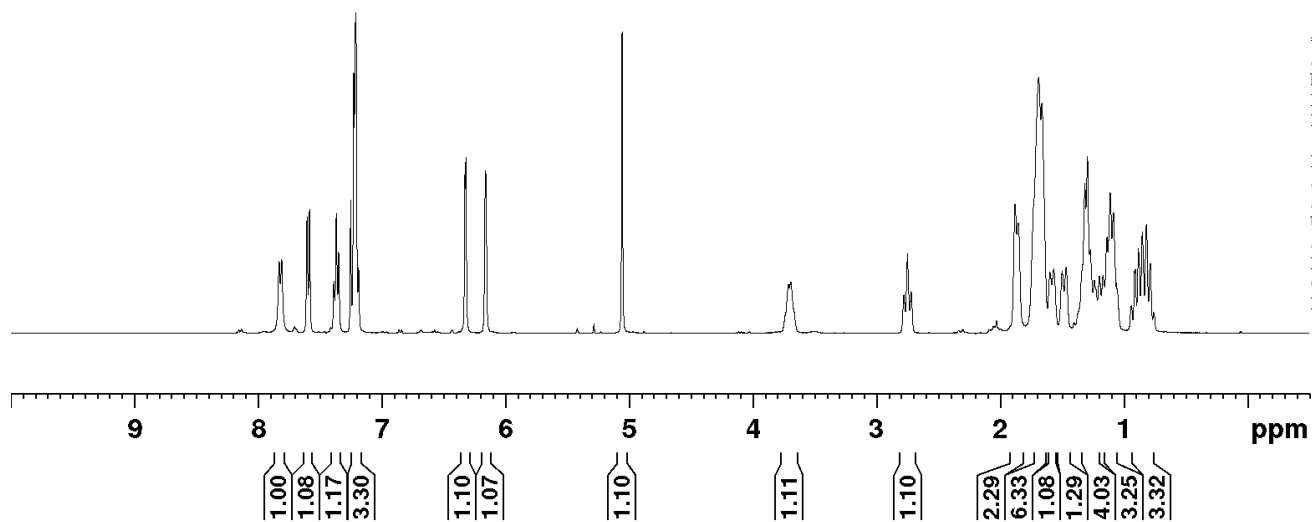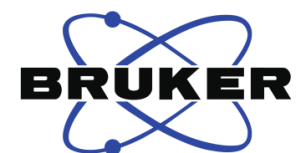

Current Data Parameters  
 NAME A2-Better  
 EXPNO 2  
 PROCNO 1

F2 - Acquisition Parameters  
 Date\_ 20160711  
 Time 18.57  
 INSTRUM spect  
 PROBHD 5 mm PABBO BB/  
 PULPROG zg30  
 TD 65536  
 SOLVENT CDCl3  
 NS 16  
 DS 2  
 SWH 8012.820 Hz  
 FIDRES 0.122266 Hz  
 AQ 4.0894465 sec  
 RG 105.13  
 DW 62.400 usec  
 DE 6.50 usec  
 TE 293.8 K  
 D1 1.00000000 sec  
 TD0 1

==== CHANNEL f1 =====  
 SFO1 400.1524711 MHz  
 NUC1 1H  
 P1 15.00 usec  
 PLW1 9.80000019 W

F2 - Processing parameters  
 SI 65536  
 SF 400.1500136 MHz  
 WDW EM  
 SSB 0  
 LB 0.30 Hz  
 GB 0  
 PC 1.00

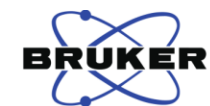

Current Data Parameters  
NAME a2 carbon  
EXPNO 1  
PROCNO 1

F2 - Acquisition Parameters  
Date\_ 20160710  
Time 21.40  
INSTRUM spect  
PROBHD 5 mm PABBO BB/  
PULPROG zgpg30  
TD 65536  
SOLVENT CDCl3  
NS 256  
DS 4  
SWH 24038.461 Hz  
FIDRES 0.366798 Hz  
AQ 1.3631488 sec  
RG 210.96  
DW 20.800 usec  
DE 10.00 usec  
TE 295.2 K  
D1 2.0000000 sec  
D11 0.0300000 sec  
TDO 1

===== CHANNEL f1 =====  
SFO1 100.6278588 MHz  
NUC1 13C  
P1 10.00 usec  
PLW1 48.20000076 W

===== CHANNEL f2 =====  
SFO2 400.1516006 MHz  
NUC2 1H  
CPDPRG[2] waltz16  
PCPD2 90.00 usec  
PLW2 9.80000019 W  
PLW12 0.27221999 W  
PLW13 0.22050001 W

F2 - Processing parameters  
SI 32768  
SF 100.6177898 MHz  
WDW EM  
SSB 0  
LB 1.00 Hz  
GB 0  
PC 1.40

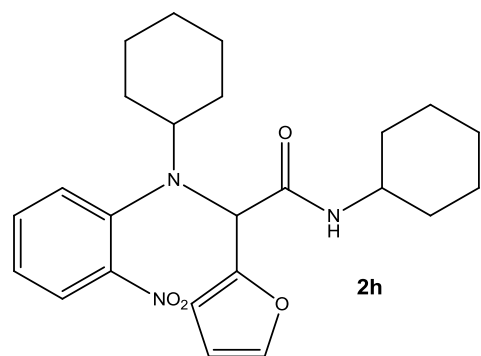

<sup>13</sup>C NMR, CDCl<sub>3</sub>  
100 MHz

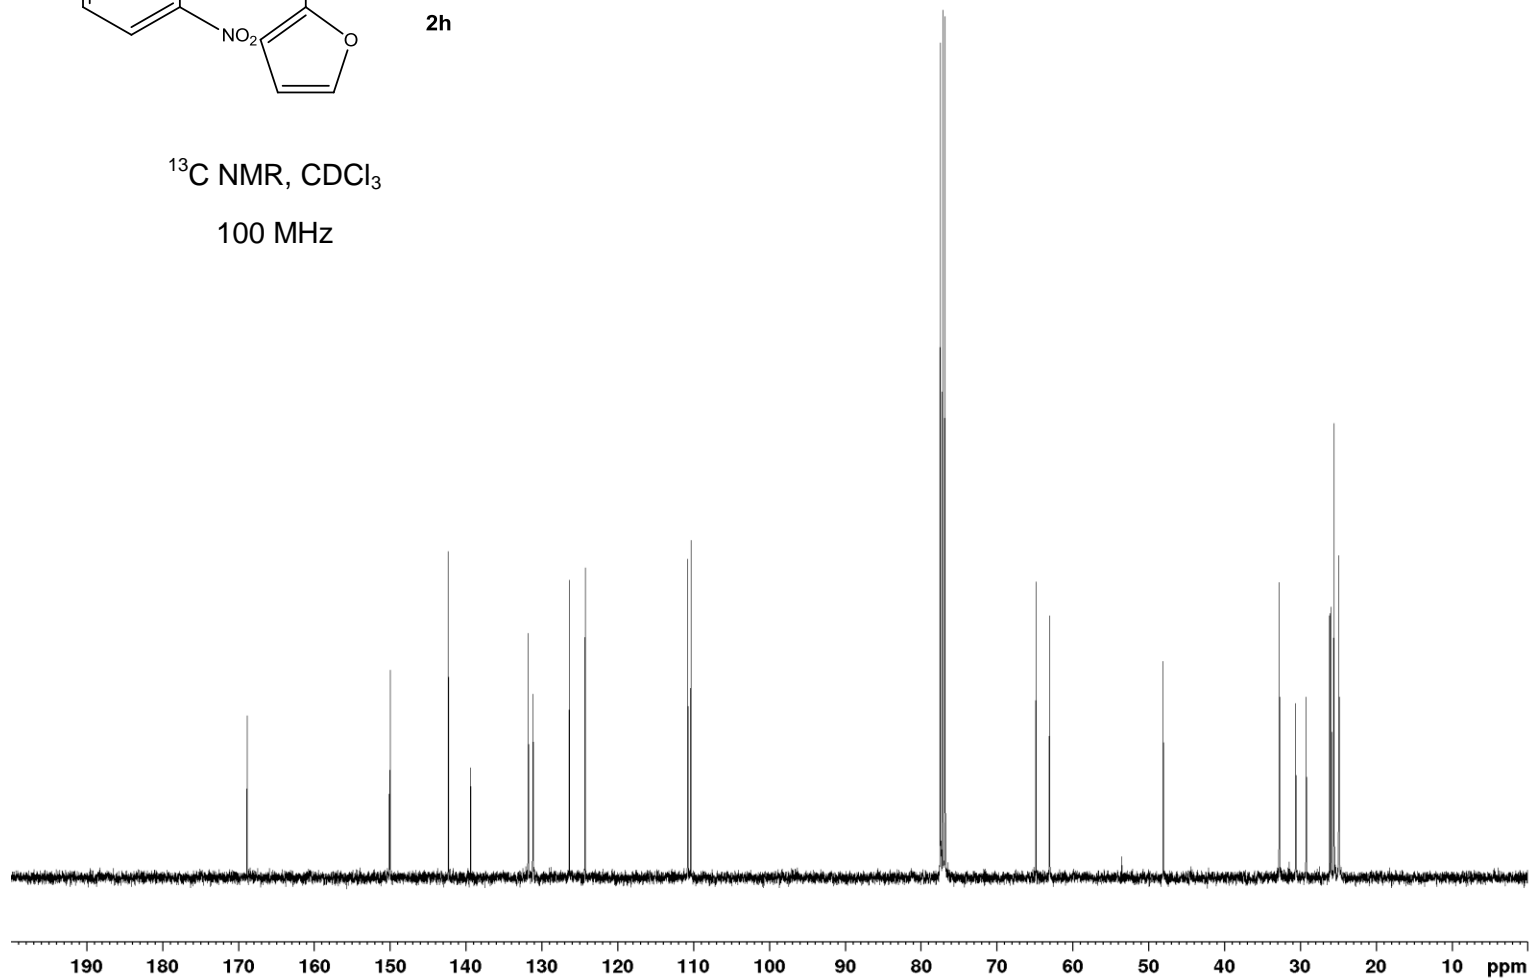

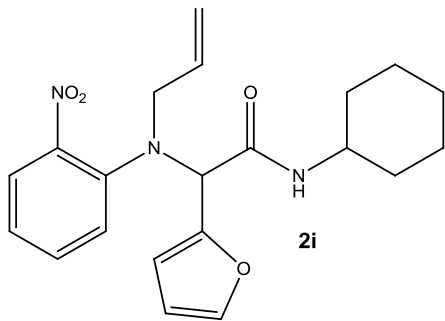

<sup>1</sup>H NMR, CDCl<sub>3</sub>  
400 MHz

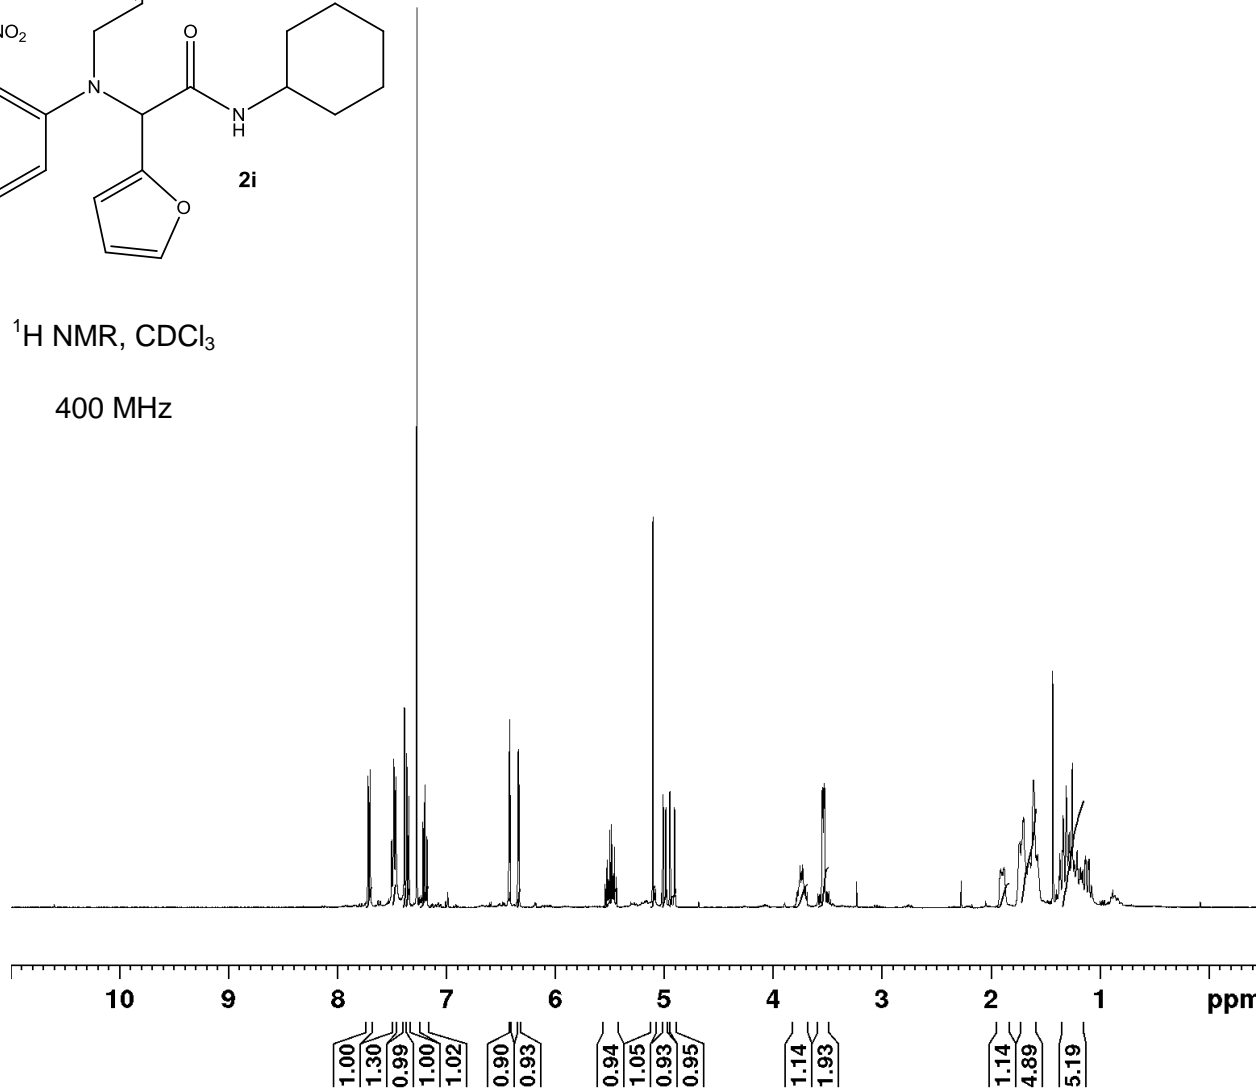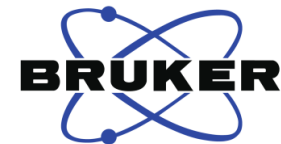

Current Data Parameters  
 NAME MM-2-6Hr-F10-14  
 EXPNO 1  
 PROCNO 1

F2 - Acquisition Parameters  
 Date\_ 20160129  
 Time 18.48  
 INSTRUM spect  
 PROBHD 5 mm PABBO BB/  
 PULPROG zg30  
 TD 65536  
 SOLVENT CDCl3  
 NS 16  
 DS 2  
 SWH 8012.820 Hz  
 FIDRES 0.122266 Hz  
 AQ 4.0894465 sec  
 RG 166.66  
 DW 62.400 usec  
 DE 6.50 usec  
 TE 293.4 K  
 D1 1.00000000 sec  
 TD0 1

===== CHANNEL f1 =====  
 SF01 400.1524711 MHz  
 NUC1 1H  
 P1 15.00 usec  
 PLW1 9.80000019 W

F2 - Processing parameters  
 SI 65536  
 SF 400.1500082 MHz  
 WDW EM  
 SSB 0  
 LB 0.30 Hz  
 GB 0  
 PC 1.00

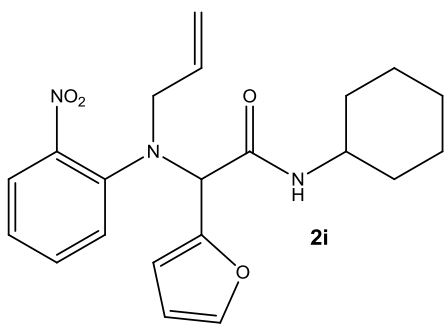

$^{13}\text{C}$  NMR,  $\text{CDCl}_3$

100 MHz

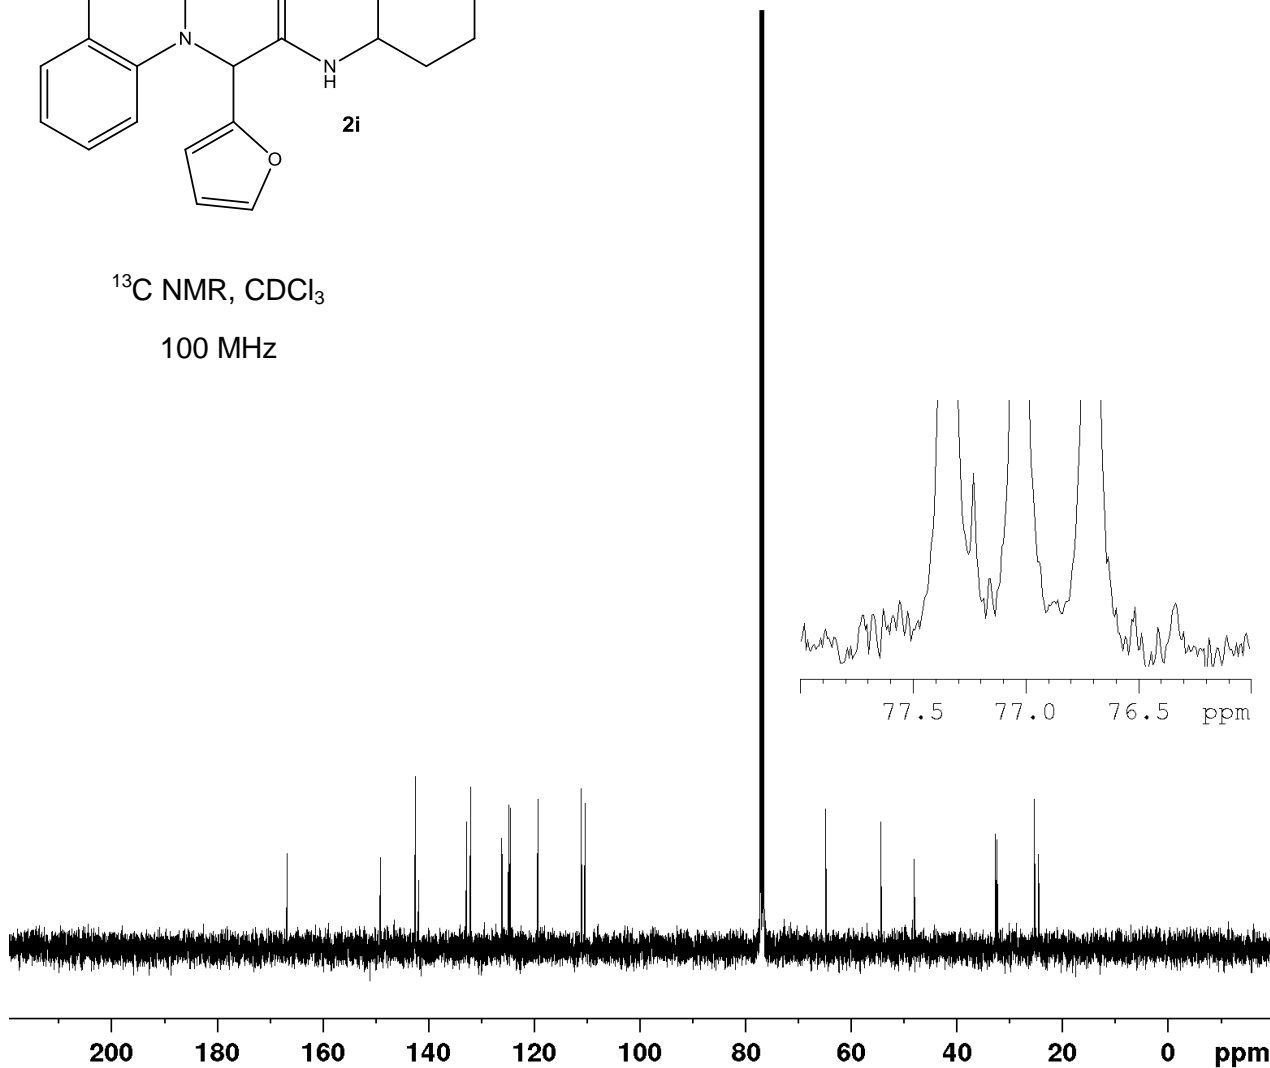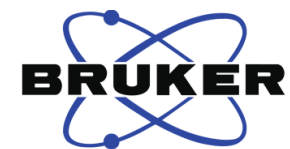

Current Data Parameters  
 NAME MM-2-6Hr-F10-14  
 EXPNO 3  
 PROCNO 1

F2 - Acquisition Parameters  
 Date\_ 20160129  
 Time 19.28  
 INSTRUM spect  
 PROBHD 5 mm PABBO BB/  
 PULPROG zgpg30  
 TD 65536  
 SOLVENT  $\text{CDCl}_3$   
 NS 256  
 DS 4  
 SWH 24038.461 Hz  
 FIDRES 0.366798 Hz  
 AQ 1.3631488 sec  
 RG 210.96  
 DW 20.800 usec  
 DE 10.00 usec  
 TE 294.7 K  
 D1 2.00000000 sec  
 D11 0.03000000 sec  
 TD0 1

===== CHANNEL f1 =====  
 SFO1 100.6278588 MHz  
 NUC1 13C  
 P1 10.00 usec  
 PLW1 48.20000076 W

===== CHANNEL f2 =====  
 SFO2 400.1516006 MHz  
 NUC2 1H  
 CPDPRG[2] waltz16  
 PCPD2 90.00 usec  
 PLW2 9.80000019 W  
 PLW12 0.27221999 W  
 PLW13 0.22050001 W

F2 - Processing parameters  
 SI 32768  
 SF 100.6177980 MHz  
 WDW EM  
 SSB 0  
 LB 1.00 Hz  
 GB 0  
 PC 1.40

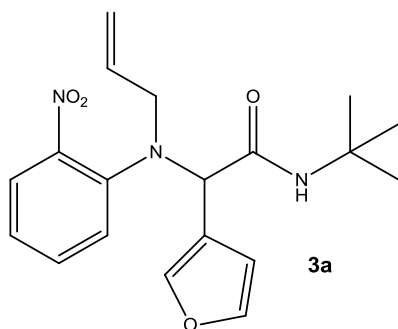

$^1\text{H}$  NMR,  $\text{CDCl}_3$   
400 MHz

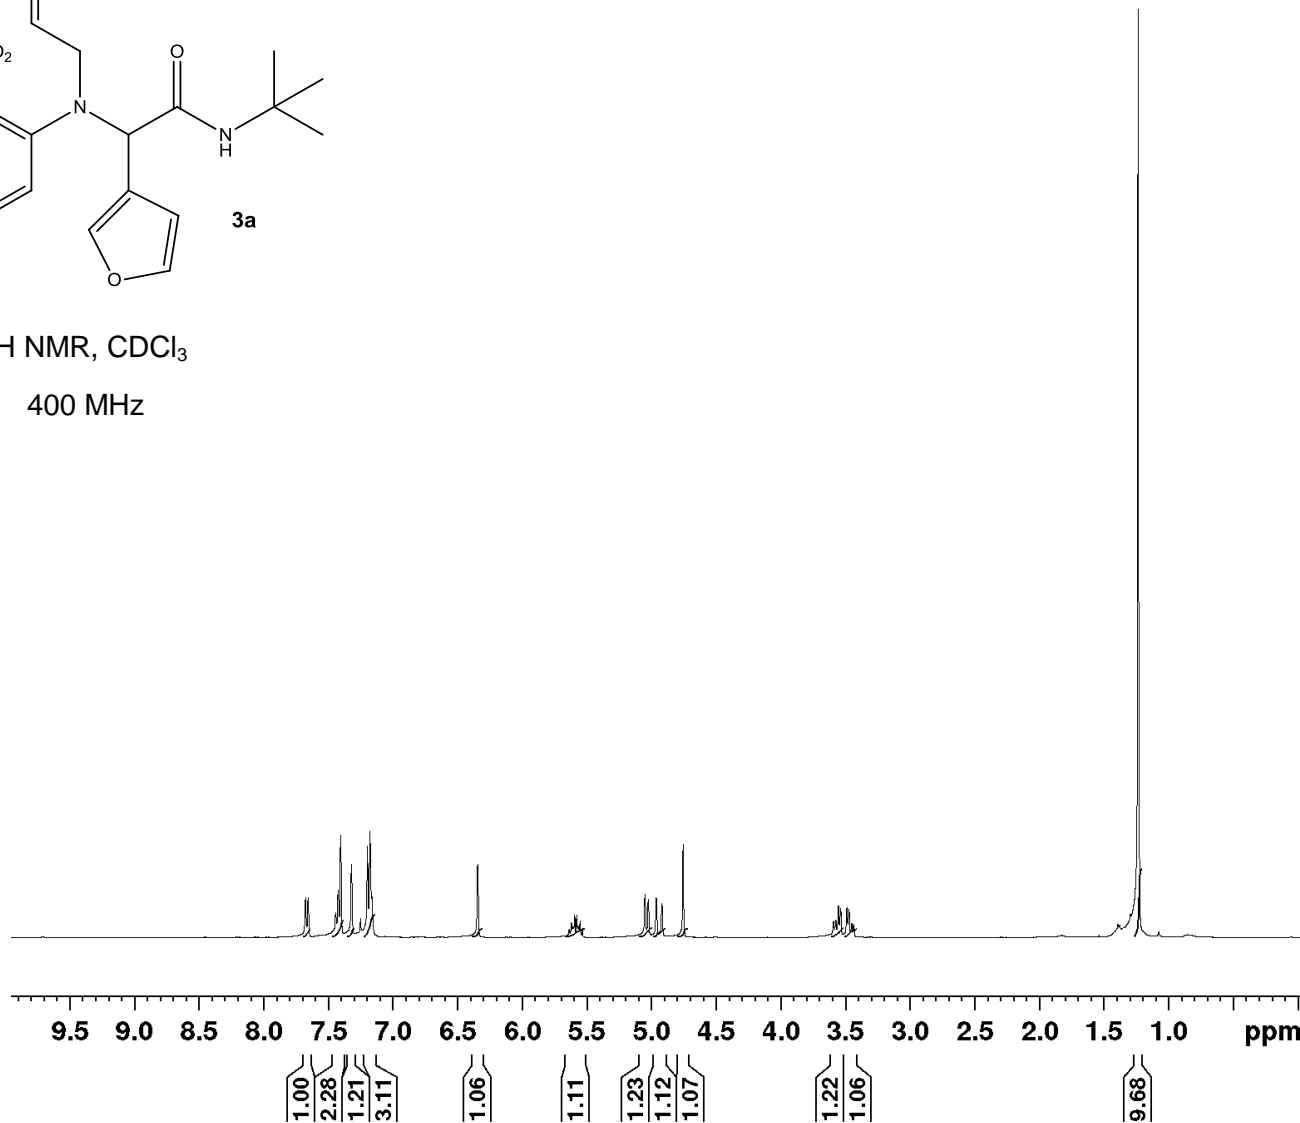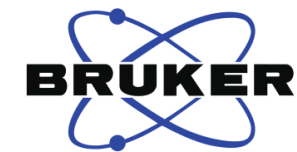

Current Data Parameters  
NAME KM-11-9-14R-F9-16  
EXPNO 10  
PROCNO 1

F2 - Acquisition Parameters  
Date\_ 20150105  
Time 12.07  
INSTRUM spect  
PROBHD 5 mm PABBO BB/  
PULPROG zg30  
TD 65536  
SOLVENT  $\text{CDCl}_3$   
NS 16  
DS 2  
SWH 8012.820 Hz  
FIDRES 0.122266 Hz  
AQ 4.0894465 sec  
RG 57.34  
DW 62.400 usec  
DE 6.50 usec  
TE 292.9 K  
D1 1.00000000 sec  
TD0 1

===== CHANNEL f1 =====  
SFO1 400.1524711 MHz  
NUC1  $^1\text{H}$   
P1 15.00 usec  
PLW1 9.80000019 W

F2 - Processing parameters  
SI 65536  
SF 400.1500149 MHz  
WDW EM  
SSB 0  
LB 0.30 Hz  
GB 0  
PC 1.00



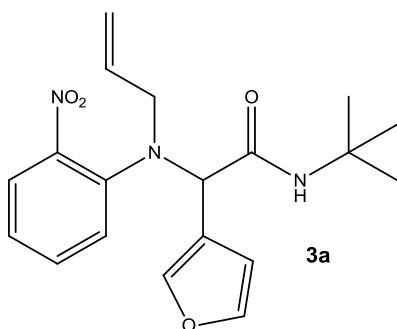

$^{13}\text{C}$  NMR,  $\text{CDCl}_3$   
100 MHz

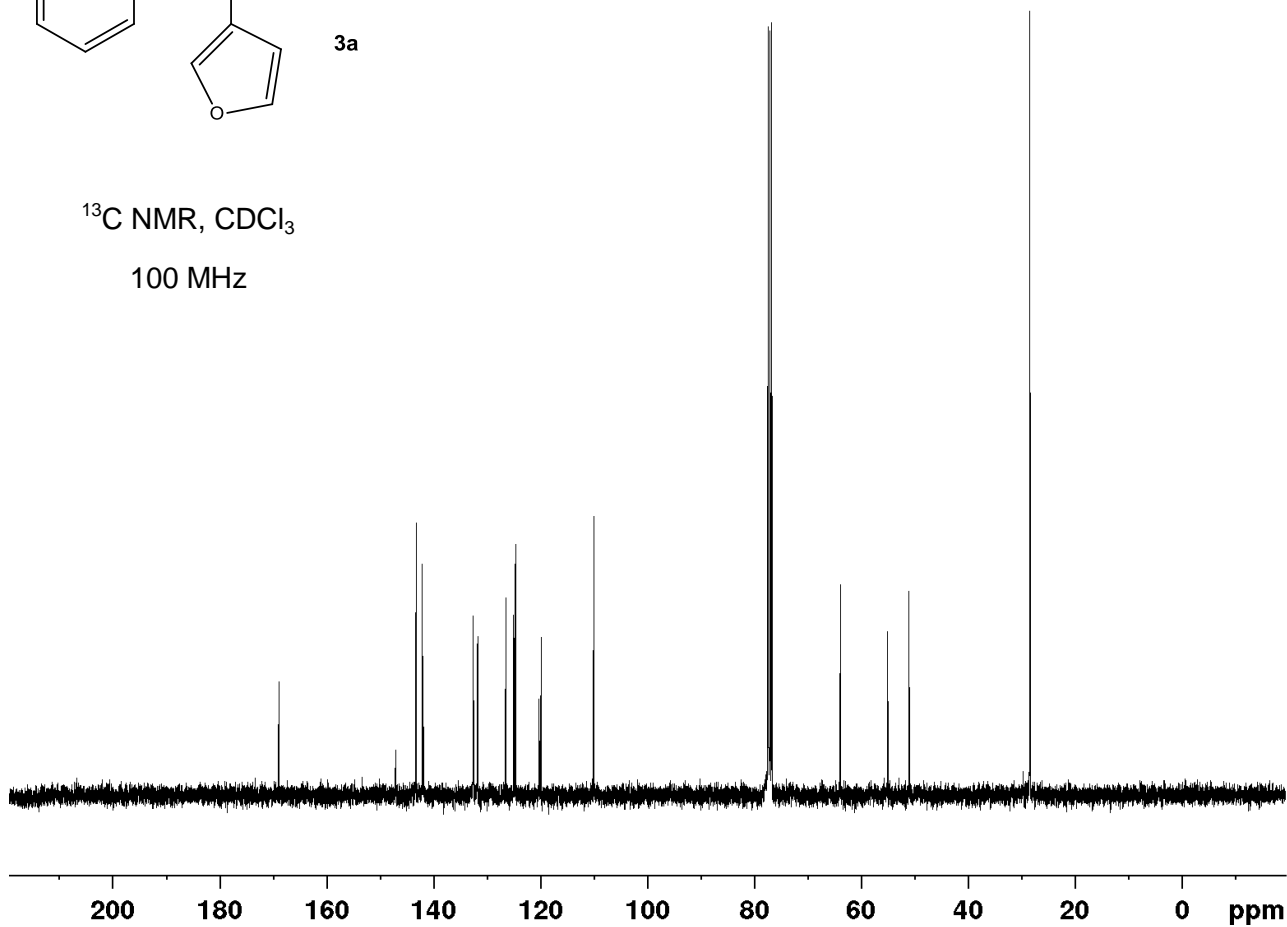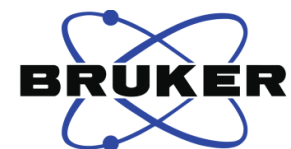

Current Data Parameters  
NAME KM-11-9-14R-F9-16-C  
EXPNO 10  
PROCNO 1

F2 - Acquisition Parameters  
Date\_ 20150106  
Time 14.05  
INSTRUM spect  
PROBHD 5 mm PABBO BB/  
PULPROG zgpg30  
TD 65536  
SOLVENT  $\text{CDCl}_3$   
NS 128  
DS 4  
SWH 24038.461 Hz  
FIDRES 0.366798 Hz  
AQ 1.3631488 sec  
RG 210.96  
DW 20.800 usec  
DE 10.00 usec  
TE 294.3 K  
D1 2.0000000 sec  
D11 0.03000000 sec  
TD0 1

===== CHANNEL f1 =====  
SFO1 100.6278588 MHz  
NUC1 13C  
P1 10.00 usec  
PLW1 48.20000076 W

===== CHANNEL f2 =====  
SFO2 400.1516006 MHz  
NUC2 1H  
CPDPRG[2] waltz16  
PCPD2 90.00 usec  
PLW2 9.80000019 W  
PLW12 0.27221999 W  
PLW13 0.22050001 W

F2 - Processing parameters  
SI 32768  
SF 100.6177971 MHz  
WDW EM  
SSB 0  
LB 1.00 Hz  
GB 0  
PC 1.40

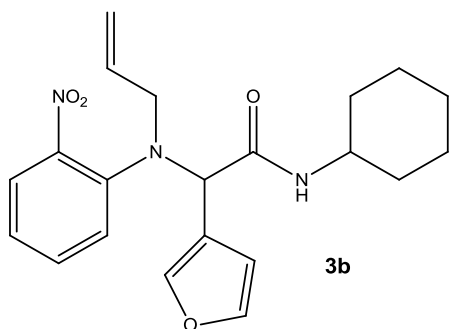

<sup>1</sup>H NMR, CDCl<sub>3</sub>

400 MHz

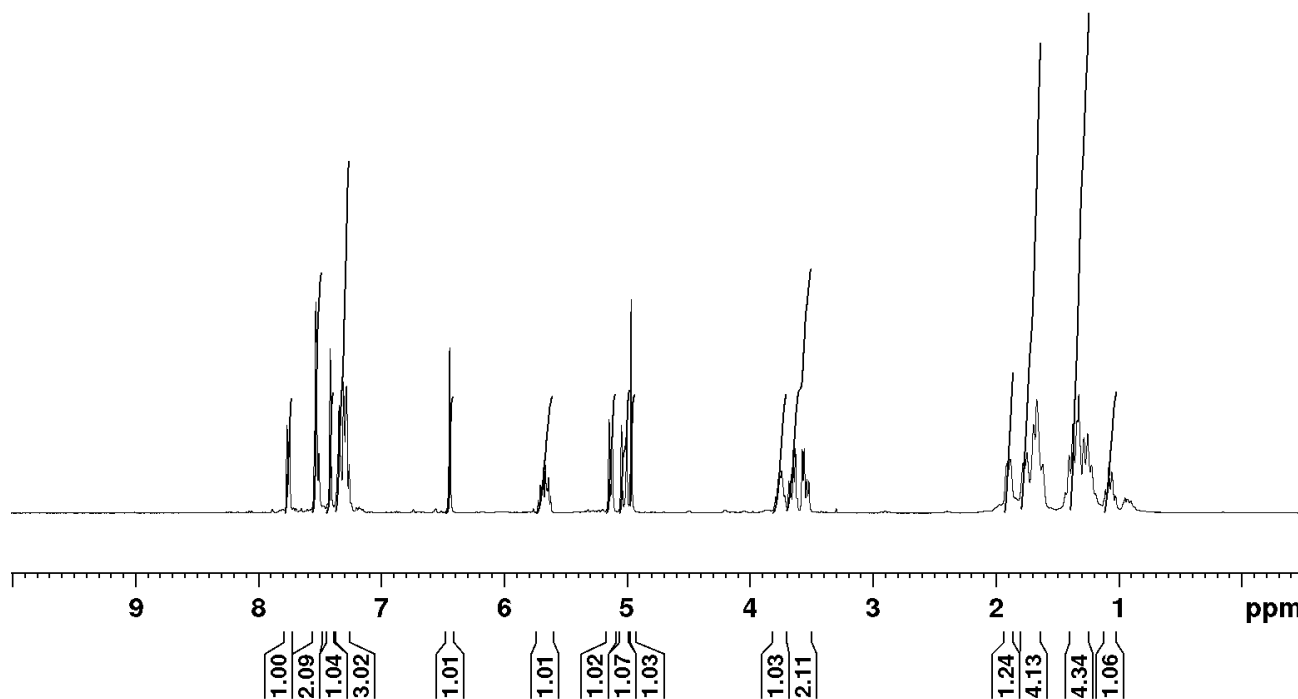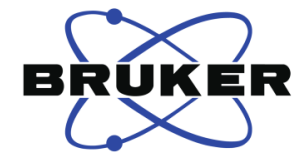

Current Data Parameters  
 NAME MM-2-71  
 EXPNO 1  
 PROCNO 1

F2 - Acquisition Parameters  
 Date\_ 20160307  
 Time 20.42  
 INSTRUM spect  
 PROBHD 5 mm PABBO BB/  
 PULPROG zg30  
 TD 65536  
 SOLVENT CDCl3  
 NS 16  
 DS 2  
 SWH 8012.820 Hz  
 FIDRES 0.122266 Hz  
 AQ 4.0894465 sec  
 RG 51.73  
 DW 62.400 usec  
 DE 6.50 usec  
 TE 296.3 K  
 D1 1.00000000 sec  
 TD0 1

===== CHANNEL f1 =====  
 SFO1 400.1524711 MHz  
 NUC1 1H  
 P1 15.00 usec  
 PLW1 9.80000019 W

F2 - Processing parameters  
 SI 65536  
 SF 400.1499781 MHz  
 WDW EM  
 SSB 0  
 LB 0.30 Hz  
 GB 0  
 PC 1.00

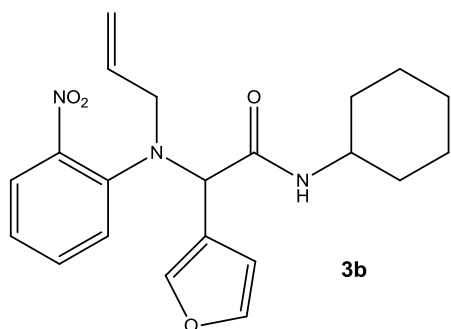

$^{13}\text{C}$  NMR,  $\text{CDCl}_3$

100 MHz

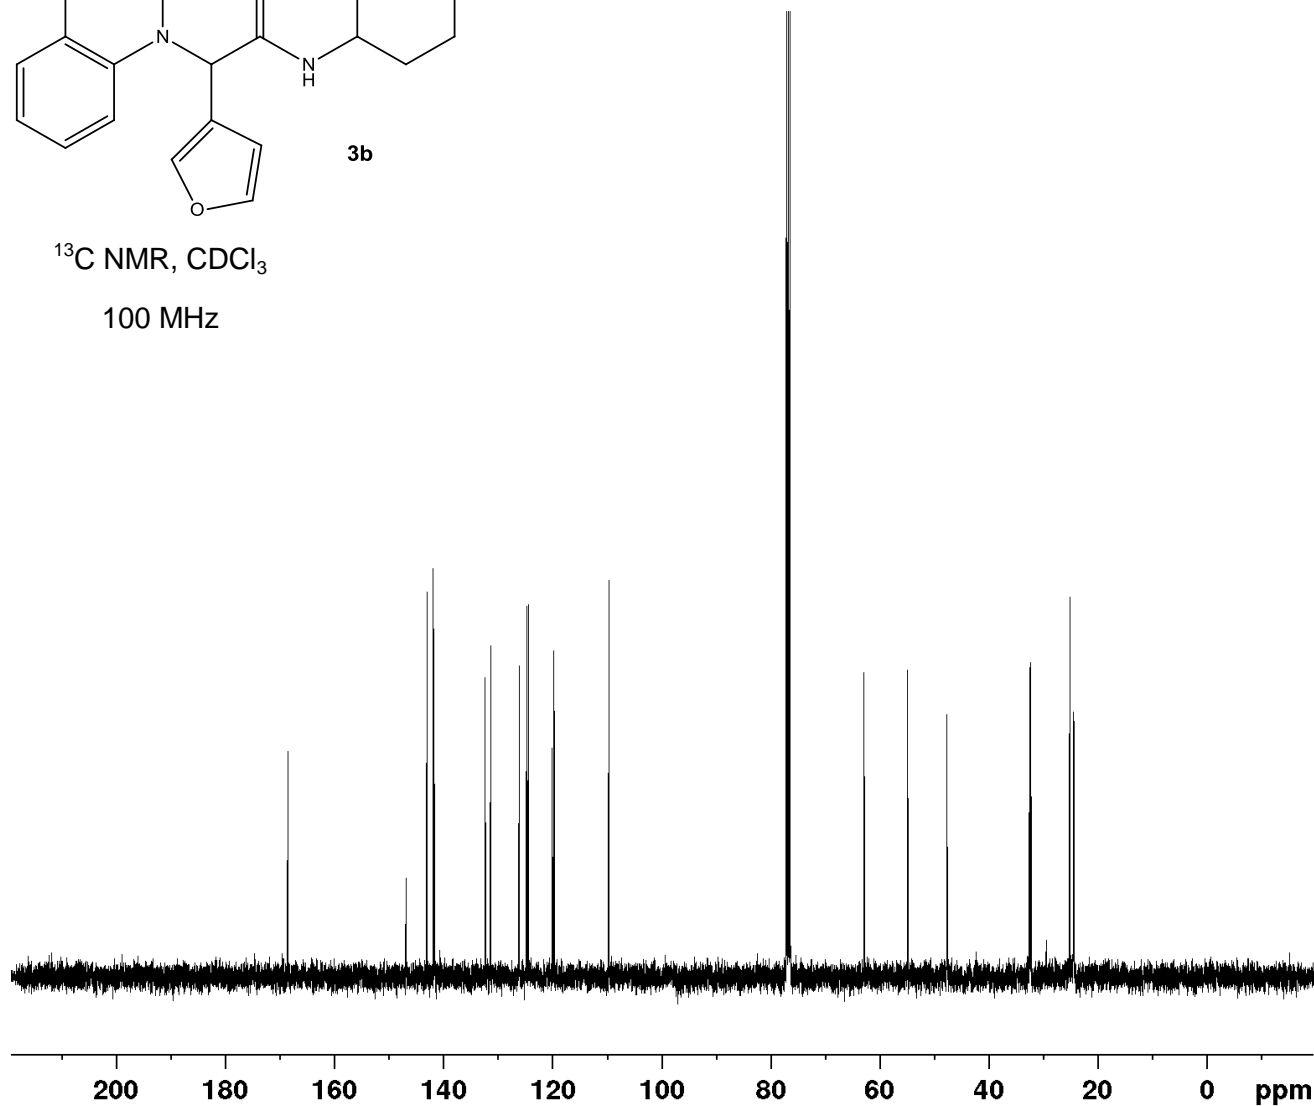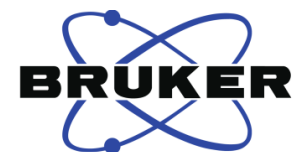

Current Data Parameters  
 NAME MM-2-71  
 EXPNO 2  
 PROCNO 1

F2 - Acquisition Parameters  
 Date\_ 20160307  
 Time 20.51  
 INSTRUM spect  
 PROBHD 5 mm PABBO BB/  
 PULPROG zgpg30  
 TD 65536  
 SOLVENT  $\text{CDCl}_3$   
 NS 128  
 DS 4  
 SWH 24038.461 Hz  
 FIDRES 0.366798 Hz  
 AQ 1.3631488 sec  
 RG 210.96  
 DW 20.800 usec  
 DE 10.00 usec  
 TE 297.2 K  
 D1 2.00000000 sec  
 D11 0.03000000 sec  
 TD0 1

==== CHANNEL f1 =====  
 SFO1 100.6278588 MHz  
 NUC1  $^{13}\text{C}$   
 P1 10.00 usec  
 PLW1 48.20000076 W

==== CHANNEL f2 =====  
 SFO2 400.1516006 MHz  
 NUC2  $^1\text{H}$   
 CPDPRG[2] waltz16  
 PCPD2 90.00 usec  
 PLW2 9.80000019 W  
 PLW12 0.27221999 W  
 PLW13 0.22050001 W

F2 - Processing parameters  
 SI 32768  
 SF 100.6178041 MHz  
 WDW EM  
 SSB 0  
 LB 1.00 Hz  
 GB 0  
 PC 1.40

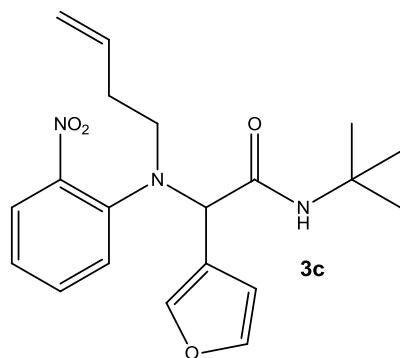

$^1\text{H}$  NMR,  $\text{CDCl}_3$   
400 MHz

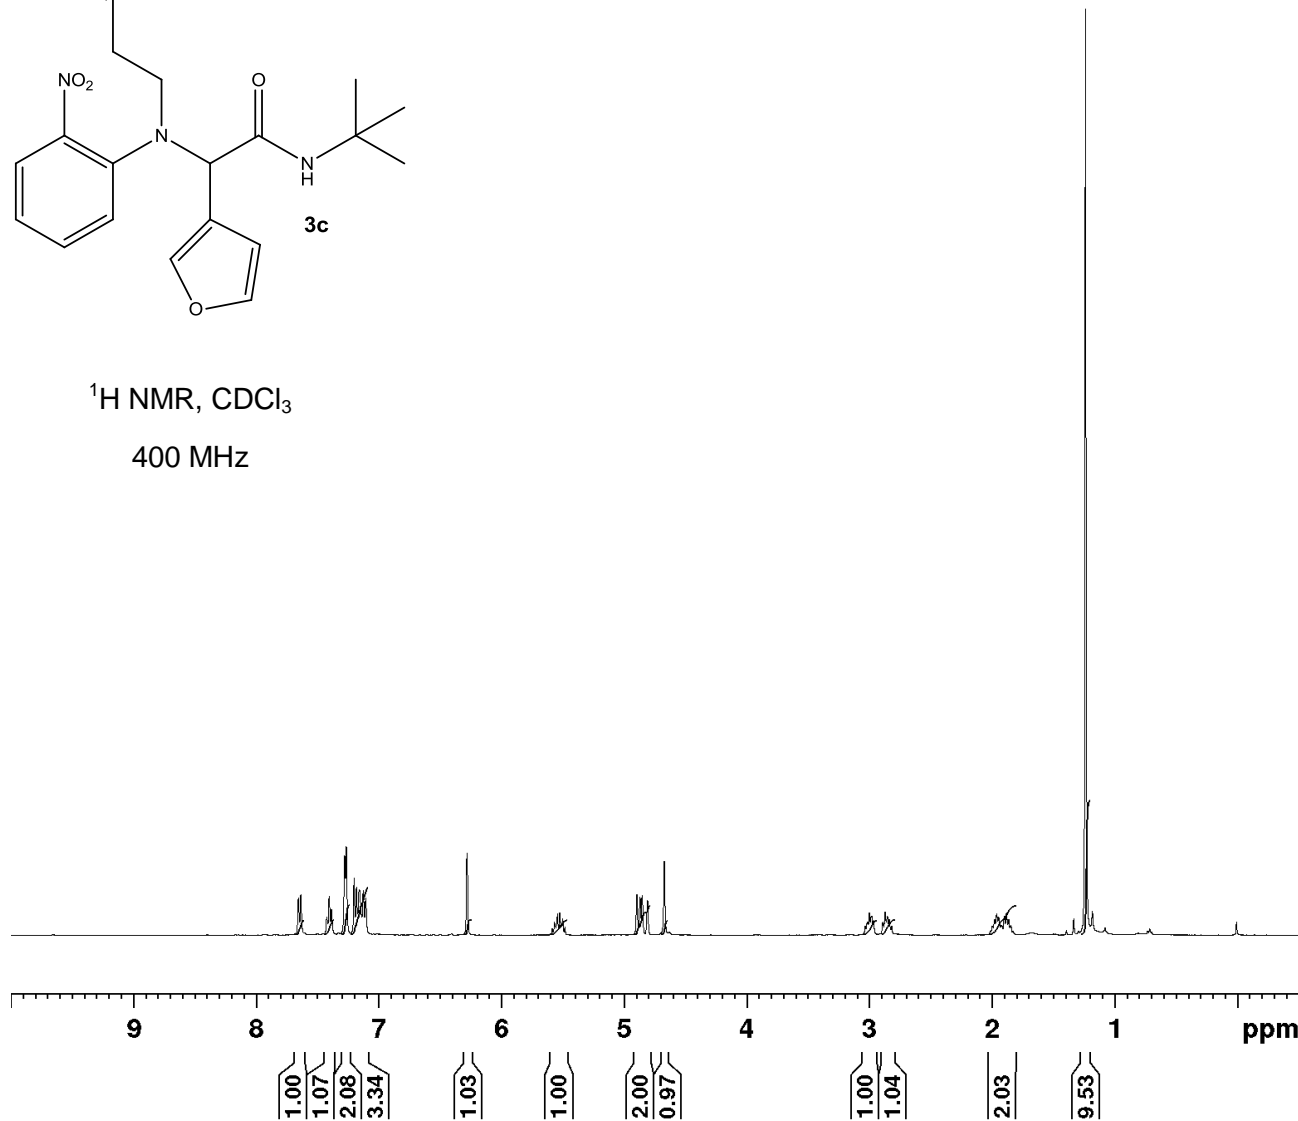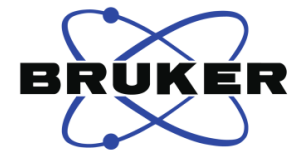

Current Data Parameters  
NAME KM-37R-F12-35-3  
EXPNO 10  
PROCNO 1

F2 - Acquisition Parameters  
Date\_ 20150513  
Time 13.35  
INSTRUM spect  
PROBHD 5 mm PABBO BB/  
PULPROG zg30  
TD 65536  
SOLVENT  $\text{CDCl}_3$   
NS 16  
DS 2  
SWH 8012.820 Hz  
FIDRES 0.122266 Hz  
AQ 4.0894465 sec  
RG 95.15  
DW 62.400 usec  
DE 6.50 usec  
TE 292.4 K  
D1 1.00000000 sec  
TD0 1

===== CHANNEL f1 =====  
SFO1 400.1524711 MHz  
NUC1  $^1\text{H}$   
P1 15.00 usec  
PLW1 9.80000019 W

F2 - Processing parameters  
SI 65536  
SF 400.1500353 MHz  
WDW EM  
SSB 0  
LB 0.30 Hz  
GB 0  
PC 1.00

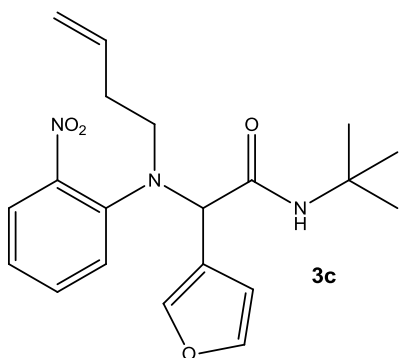

$^{13}\text{C}$  NMR,  $\text{CDCl}_3$

100 MHz

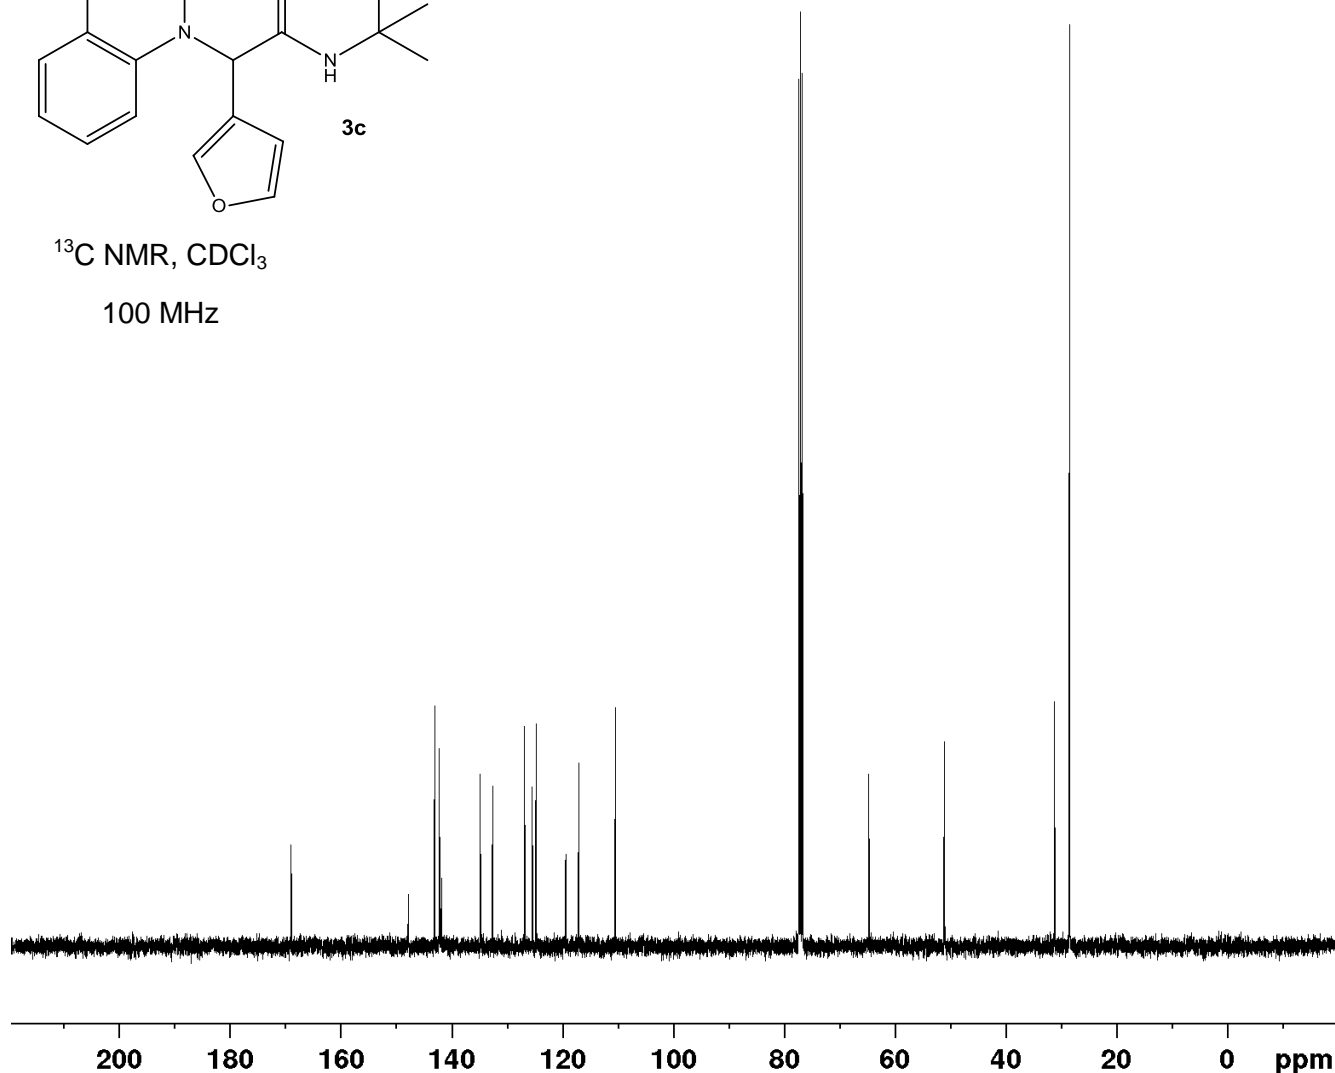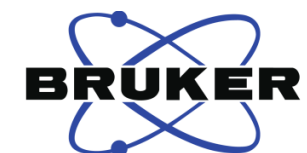

Current Data Parameters  
 NAME KM-37R-F12-35-3  
 EXPNO 20  
 PROCNO 1

F2 - Acquisition Parameters

Date\_ 20150513  
 Time 13.44  
 INSTRUM spect  
 PROBHD 5 mm PABBO BB/  
 PULPROG zgpg30  
 TD 65536  
 SOLVENT  $\text{CDCl}_3$   
 NS 128  
 DS 4  
 SWH 24038.461 Hz  
 FIDRES 0.366798 Hz  
 AQ 1.3631488 sec  
 RG 210.96  
 DW 20.800 usec  
 DE 10.00 usec  
 TE 293.5 K  
 D1 2.00000000 sec  
 D11 0.03000000 sec  
 TD0 1

===== CHANNEL f1 =====  
 SFO1 100.6278588 MHz  
 NUC1 13C  
 P1 10.00 usec  
 PLW1 48.20000076 W

===== CHANNEL f2 =====  
 SFO2 400.1516006 MHz  
 NUC2 1H  
 CPDPRG[2] waltz16  
 PCPD2 90.00 usec  
 PLW2 9.80000019 W  
 PLW12 0.27221999 W  
 PLW13 0.22050001 W

F2 - Processing parameters  
 SI 32768  
 SF 100.6177903 MHz  
 WDW EM  
 SSB 0  
 LB 1.00 Hz  
 GB 0  
 PC 1.40

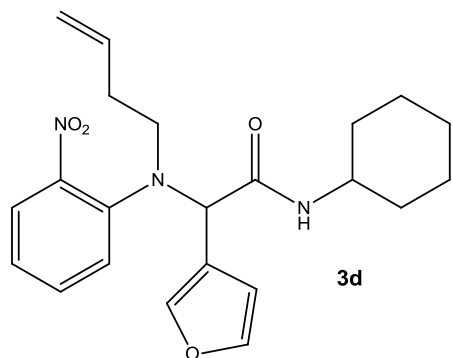

<sup>1</sup>H NMR, CDCl<sub>3</sub>

400 MHz

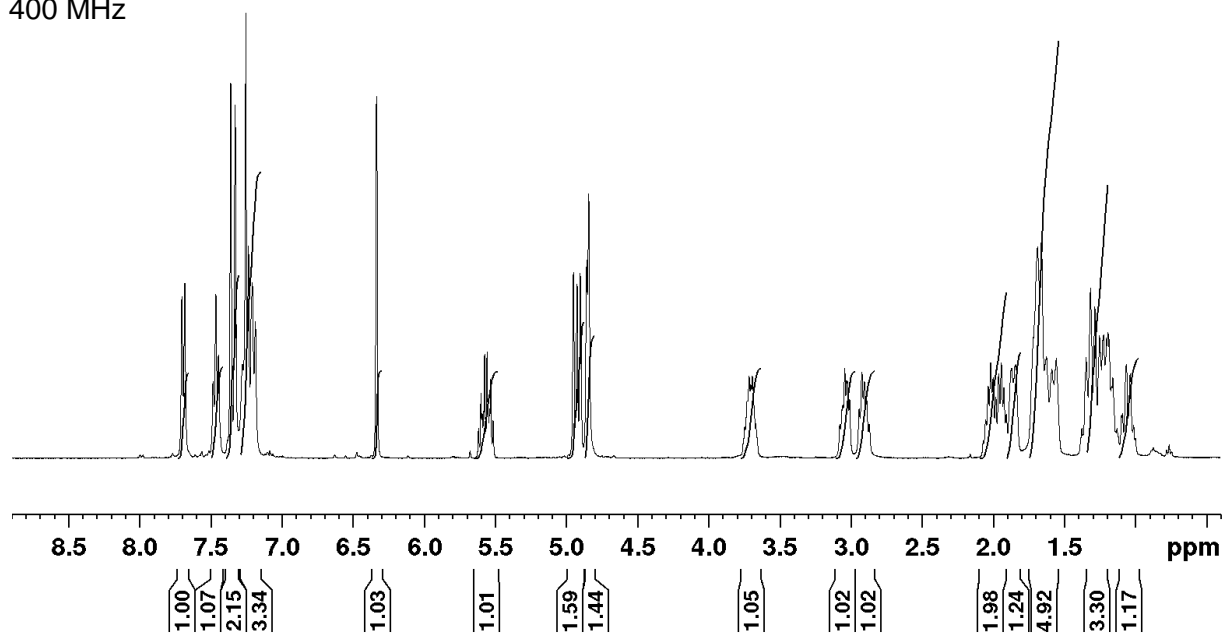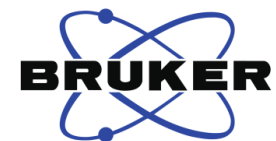

Current Data Parameters  
 NAME MM-2-73  
 EXPNO 3  
 PROCNO 1

F2 - Acquisition Parameters  
 Date\_ 20160308  
 Time 15.04  
 INSTRUM spect  
 PROBHD 5 mm PABBO BB/  
 PULPROG zg30  
 TD 65536  
 SOLVENT CDCl3  
 NS 16  
 DS 2  
 SWH 8012.820 Hz  
 FIDRES 0.122266 Hz  
 AQ 4.0894465 sec  
 RG 120.42  
 DW 62.400 usec  
 DE 6.50 usec  
 TE 293.9 K  
 D1 1.00000000 sec  
 TD0 1

===== CHANNEL f1 =====  
 SFO1 400.1524711 MHz  
 NUC1 1H  
 P1 15.00 usec  
 PLW1 9.80000019 W

F2 - Processing parameters  
 SI 65536  
 SF 400.1500119 MHz  
 WDW EM  
 SSB 0  
 LB 0.30 Hz  
 GB 0  
 PC 1.00

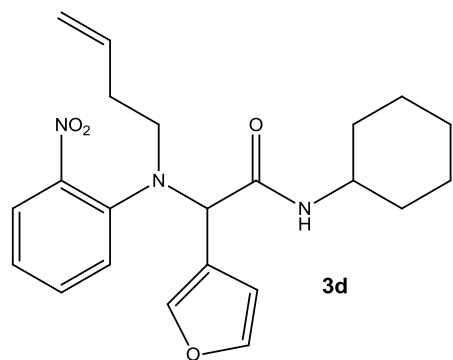

$^{13}\text{C}$  NMR,  $\text{CDCl}_3$

100 MHz

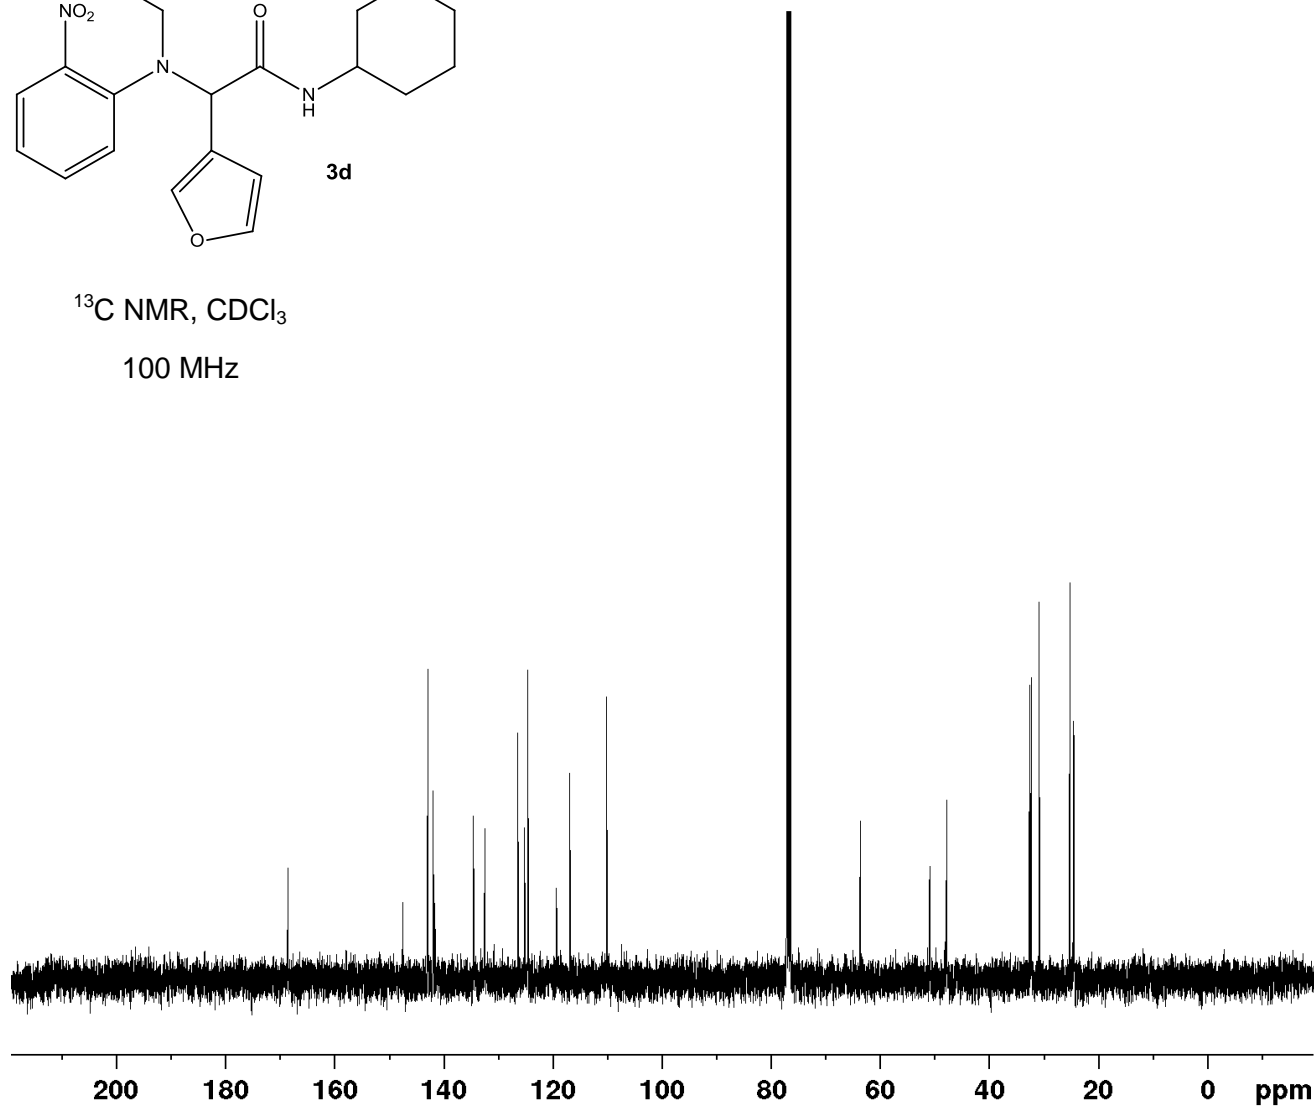

Current Data Parameters  
 NAME MM-2-73  
 EXPNO 4  
 PROCNO 1

F2 - Acquisition Parameters  
 Date\_ 20160308  
 Time 15.12  
 INSTRUM spect  
 PROBHD 5 mm PABBO BB/  
 PULPROG zgpg30  
 TD 65536  
 SOLVENT  $\text{CDCl}_3$   
 NS 128  
 DS 4  
 SWH 24038.461 Hz  
 FIDRES 0.366798 Hz  
 AQ 1.3631488 sec  
 RG 210.96  
 DW 20.800 usec  
 DE 10.00 usec  
 TE 294.8 K  
 D1 2.00000000 sec  
 D11 0.03000000 sec  
 TD0 1

===== CHANNEL f1 =====  
 SFO1 100.6278588 MHz  
 NUC1  $^{13}\text{C}$   
 P1 10.00 usec  
 PLW1 48.20000076 W

===== CHANNEL f2 =====  
 SFO2 400.1516006 MHz  
 NUC2  $^1\text{H}$   
 CPDPRG[2] waltz16  
 PCPD2 90.00 usec  
 PLW2 9.80000019 W  
 PLW12 0.27221999 W  
 PLW13 0.22050001 W

F2 - Processing parameters  
 SI 32768  
 SF 100.6178041 MHz  
 WDW EM  
 SSB 0  
 LB 1.00 Hz  
 GB 0  
 PC 1.40

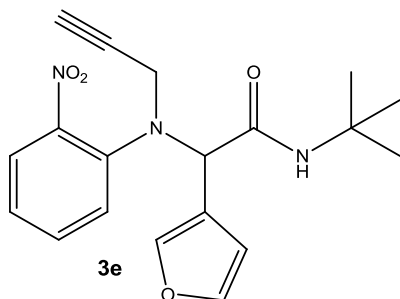

$^1\text{H NMR}$ ,  $\text{CDCl}_3$

400 MHz

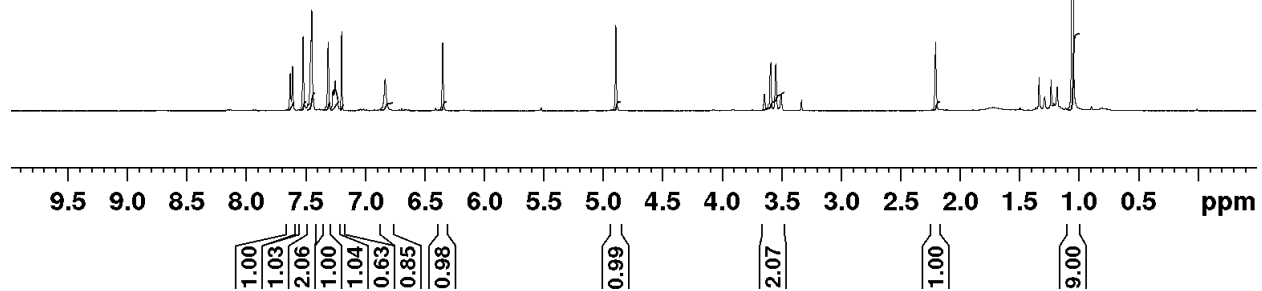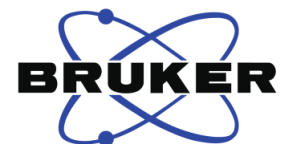

Current Data Parameters  
 NAME KM-36R-F61-70-3  
 EXPNO 10  
 PROCNO 1

F2 - Acquisition Parameters  
 Date\_ 20150513  
 Time 13.49  
 INSTRUM spect  
 PROBHD 5 mm PABBO BB/  
 PULPROG zg30  
 TD 65536  
 SOLVENT  $\text{CDCl}_3$   
 NS 16  
 DS 2  
 SWH 8012.820 Hz  
 FIDRES 0.122266 Hz  
 AQ 4.0894465 sec  
 RG 152.01  
 DW 62.400 usec  
 DE 6.50 usec  
 TE 292.6 K  
 D1 1.00000000 sec  
 TD0 1

===== CHANNEL f1 =====  
 SFO1 400.1524711 MHz  
 NUC1 1H  
 P1 15.00 usec  
 PLW1 9.80000019 W

F2 - Processing parameters  
 SI 65536  
 SF 400.1500364 MHz  
 WDW EM  
 SSB 0  
 LB 0.30 Hz  
 GB 0  
 PC 1.00



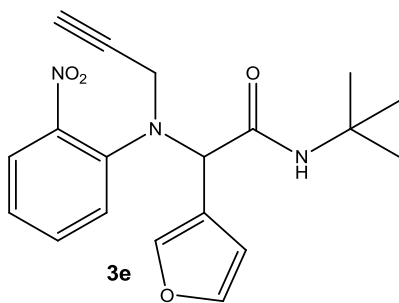

$^{13}\text{C}$  NMR,  $\text{CDCl}_3$

100 MHz

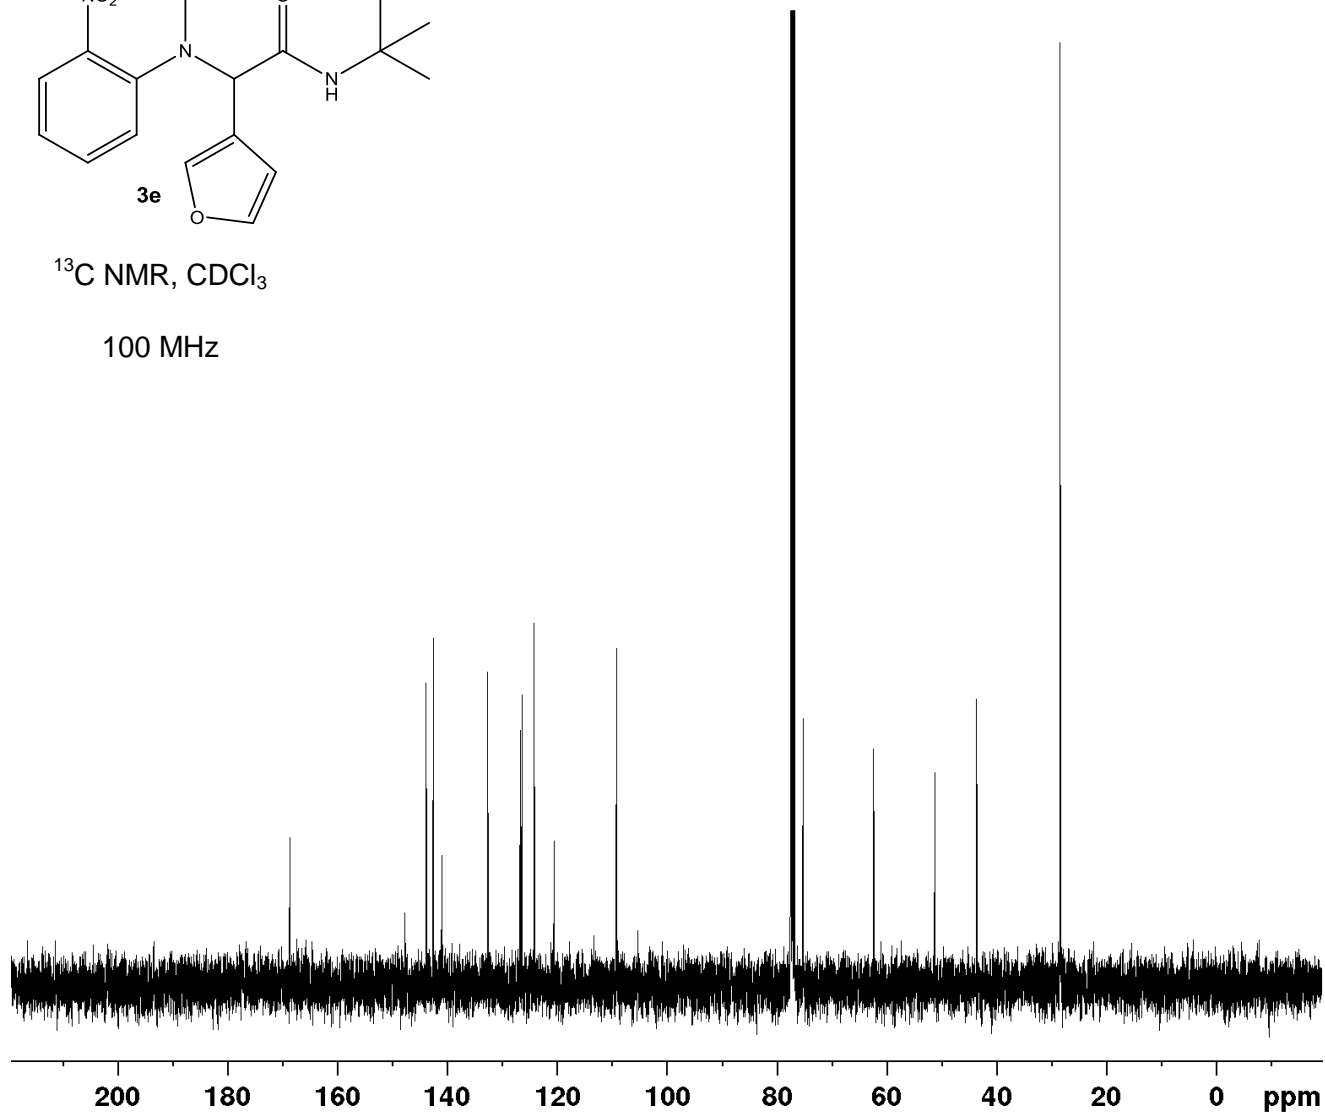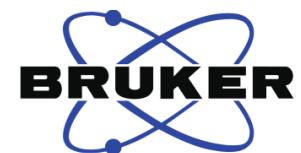

Current Data Parameters  
 NAME KM-36R-F61-70-3  
 EXPNO 20  
 PROCNO 1

F2 - Acquisition Parameters  
 Date\_ 20150513  
 Time 13.57  
 INSTRUM spect  
 PROBHD 5 mm PABBO BB/  
 PULPROG zgpg30  
 TD 65536  
 SOLVENT  $\text{CDCl}_3$   
 NS 128  
 DS 4  
 SWH 24038.461 Hz  
 FIDRES 0.366798 Hz  
 AQ 1.3631488 sec  
 RG 210.96  
 DW 20.800 usec  
 DE 10.00 usec  
 TE 293.5 K  
 D1 2.00000000 sec  
 D11 0.03000000 sec  
 TD0 1

===== CHANNEL f1 =====  
 SFO1 100.6278588 MHz  
 NUC1  $^{13}\text{C}$   
 P1 10.00 usec  
 PLW1 48.20000076 W

===== CHANNEL f2 =====  
 SFO2 400.1516006 MHz  
 NUC2  $^1\text{H}$   
 CPDPRG[2] waltz16  
 PCPD2 90.00 usec  
 PLW2 9.80000019 W  
 PLW12 0.27221999 W  
 PLW13 0.22050001 W

F2 - Processing parameters  
 SI 32768  
 SF 100.6177852 MHz  
 WDW EM  
 SSB 0  
 LB 1.00 Hz  
 GB 0  
 PC 1.40

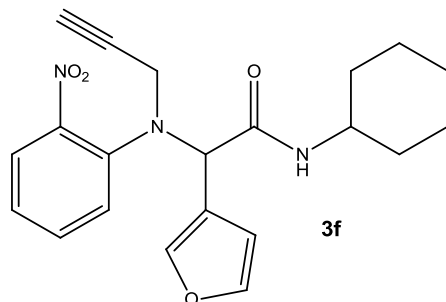

<sup>1</sup>H NMR, CDCl<sub>3</sub>

400 MHz

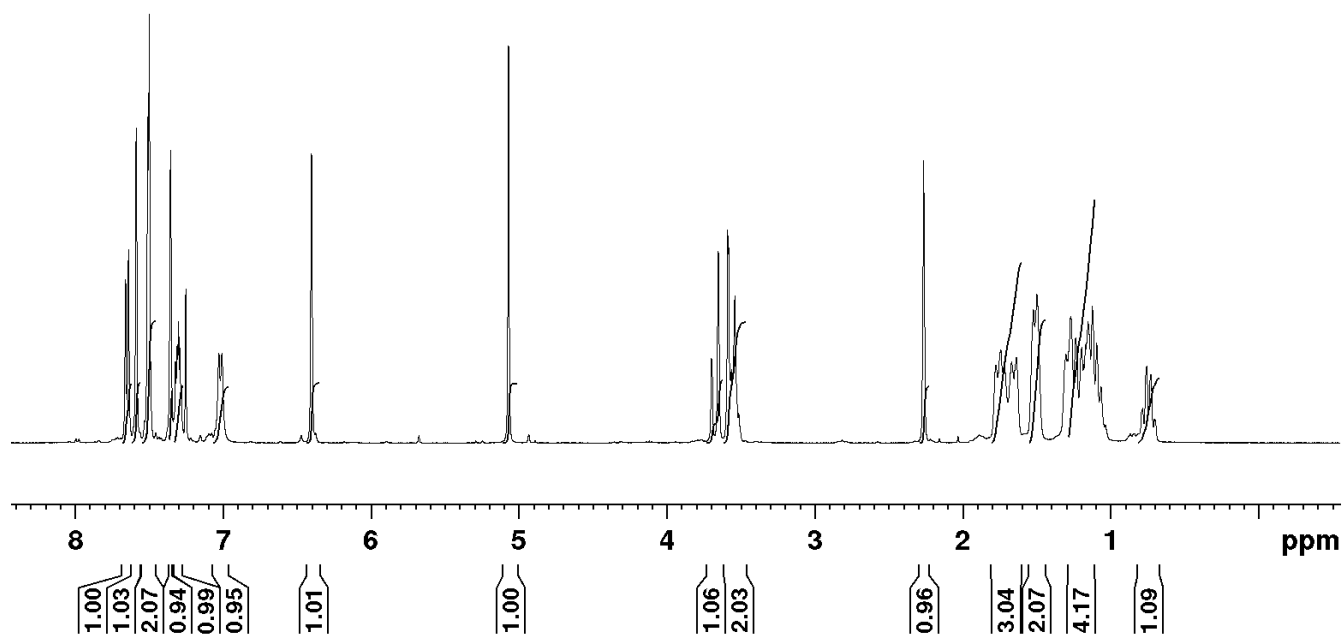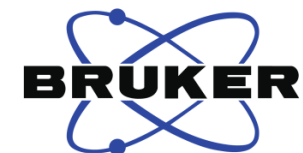

Current Data Parameters  
 NAME MM-2-72  
 EXPNO 3  
 PROCNO 1

F2 - Acquisition Parameters  
 Date\_ 20160308  
 Time 14.50  
 INSTRUM spect  
 PROBHD 5 mm PABBO BB/  
 PULPROG zg30  
 TD 65536  
 SOLVENT CDCl3  
 NS 16  
 DS 2  
 SWH 8012.820 Hz  
 FIDRES 0.122266 Hz  
 AQ 4.0894465 sec  
 RG 57.34  
 DW 62.400 usec  
 DE 6.50 usec  
 TE 293.8 K  
 D1 1.00000000 sec  
 TDO 1

==== CHANNEL f1 =====  
 SFO1 400.1524711 MHz  
 NUC1 1H  
 P1 15.00 usec  
 PLW1 9.80000019 W

F2 - Processing parameters  
 SI 65536  
 SF 400.1500119 MHz  
 WDW EM  
 SSB 0  
 LB 0.30 Hz  
 GB 0  
 PC 1.00

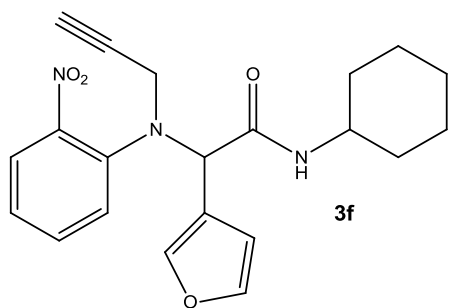

$^{13}\text{C}$  NMR,  $\text{CDCl}_3$

100 MHz

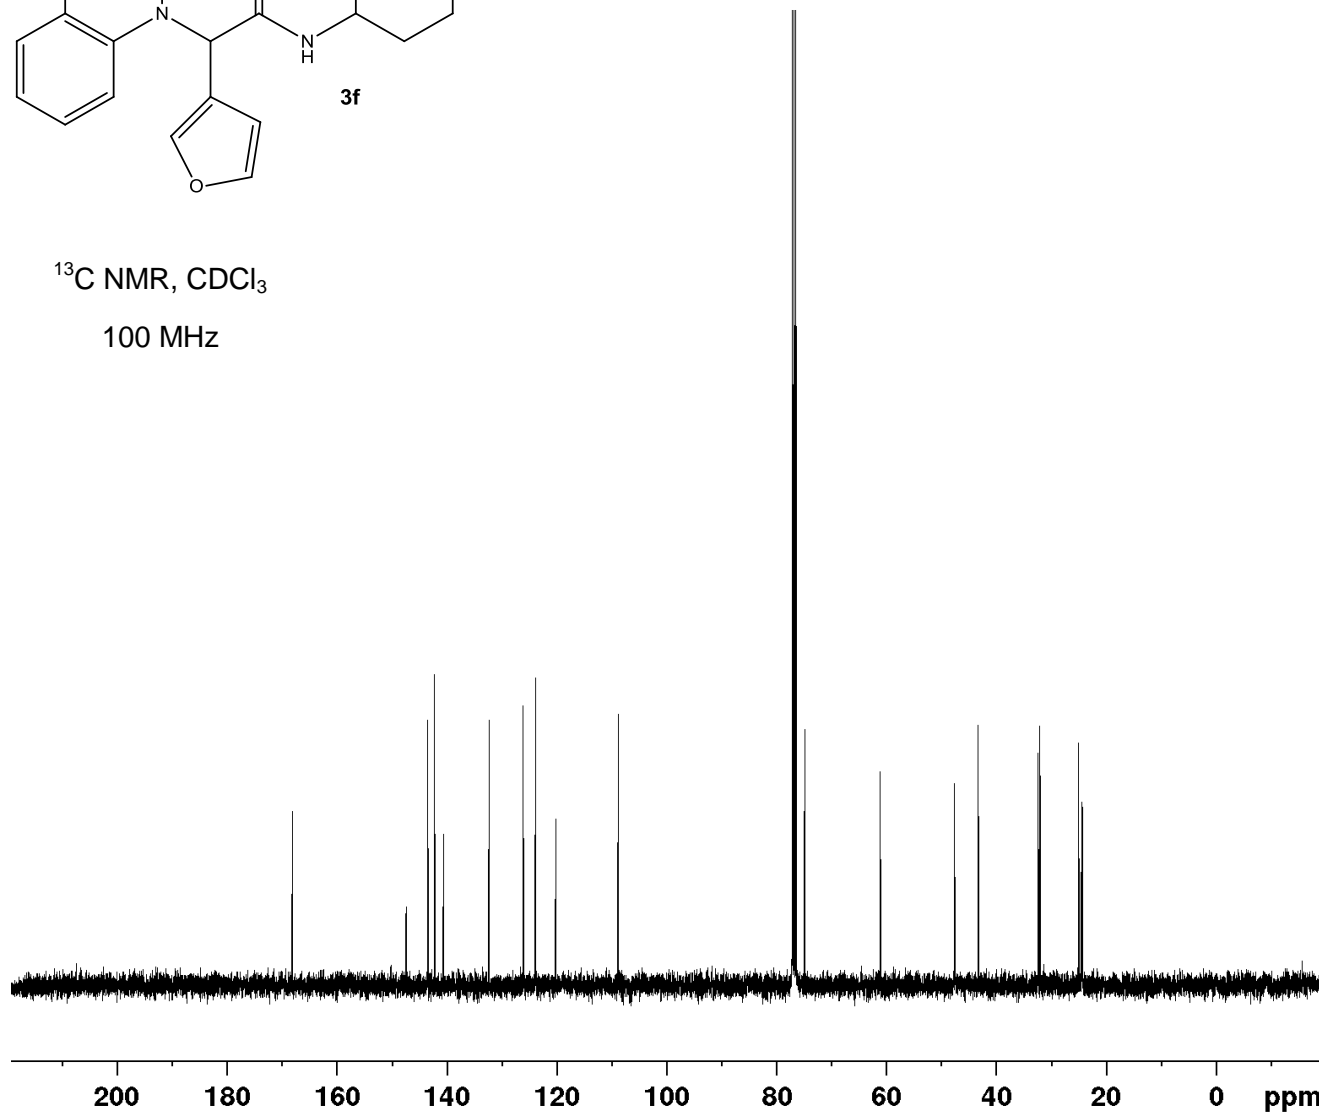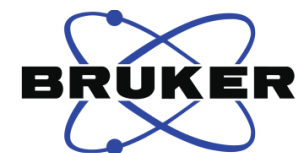

Current Data Parameters  
 NAME MM-2-72  
 EXPNO 2  
 PROCNO 1

F2 - Acquisition Parameters  
 Date\_ 20160307  
 Time 21.04  
 INSTRUM spect  
 PROBHD 5 mm PABBO BB/  
 PULPROG zgpg30  
 TD 65536  
 SOLVENT CDCl3  
 NS 128  
 DS 4  
 SWH 24038.461 Hz  
 FIDRES 0.366798 Hz  
 AQ 1.3631488 sec  
 RG 210.96  
 DW 20.800 usec  
 DE 10.00 usec  
 TE 297.3 K  
 D1 2.00000000 sec  
 D11 0.03000000 sec  
 TD0 1

===== CHANNEL f1 =====  
 SFO1 100.6278588 MHz  
 NUC1 13C  
 P1 10.00 usec  
 PLW1 48.20000076 W

===== CHANNEL f2 =====  
 SFO2 400.1516006 MHz  
 NUC2 1H  
 CPDPRG[2] waltz16  
 PCPD2 90.00 usec  
 PLW2 9.80000019 W  
 PLW12 0.27221999 W  
 PLW13 0.22050001 W

F2 - Processing parameters  
 SI 32768  
 SF 100.6178041 MHz  
 WDW EM  
 SSB 0  
 LB 1.00 Hz  
 GB 0  
 PC 1.40

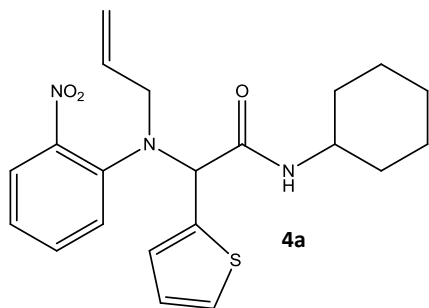

$^1\text{H}$  NMR,  $\text{CDCl}_3$

400 MHz

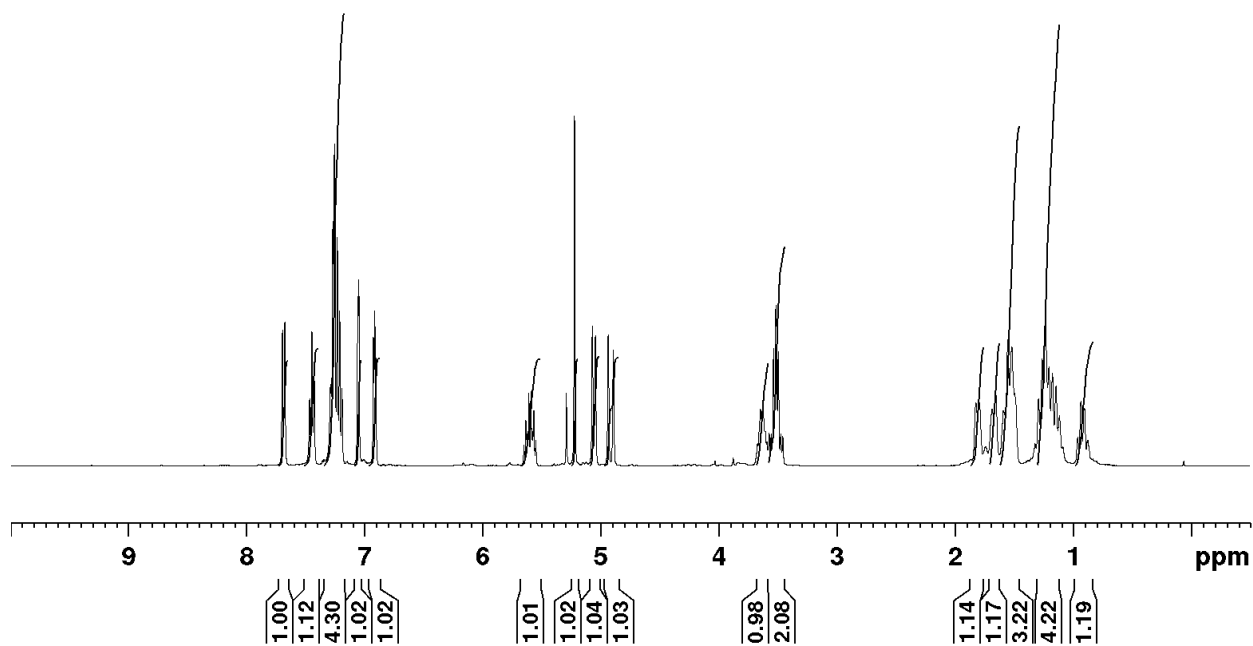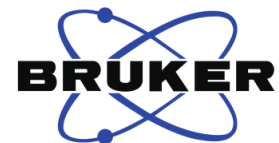

Current Data Parameters  
 NAME MM-2-26-2-F14-21  
 EXPNO 10  
 PROCNO 1

F2 - Acquisition Parameters  
 Date\_ 20150512  
 Time 13.38  
 INSTRUM spect  
 PROBHD 5 mm PABBO BB/  
 PULPROG zg30  
 TD 65536  
 SOLVENT  $\text{CDCl}_3$   
 NS 16  
 DS 2  
 SWH 8012.820 Hz  
 FIDRES 0.122266 Hz  
 AQ 4.0894465 sec  
 RG 82.91  
 DW 62.400 usec  
 DE 6.50 usec  
 TE 292.2 K  
 D1 1.00000000 sec  
 TD0 1

----- CHANNEL f1 -----  
 SFO1 400.1524711 MHz  
 NUC1 1H  
 P1 15.00 usec  
 PLW1 9.80000019 W

F2 - Processing parameters  
 SI 65536  
 SF 400.1500108 MHz  
 WDW EM  
 SSB 0  
 LB 0.30 Hz  
 GB 0  
 PC 1.00

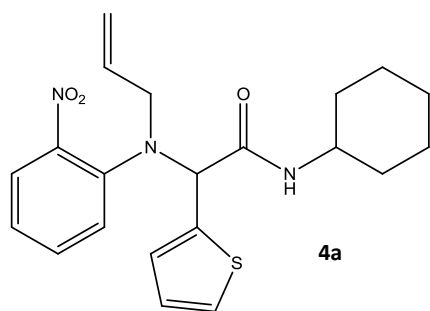

$^{13}\text{C}$  NMR,  $\text{CDCl}_3$

100 MHz

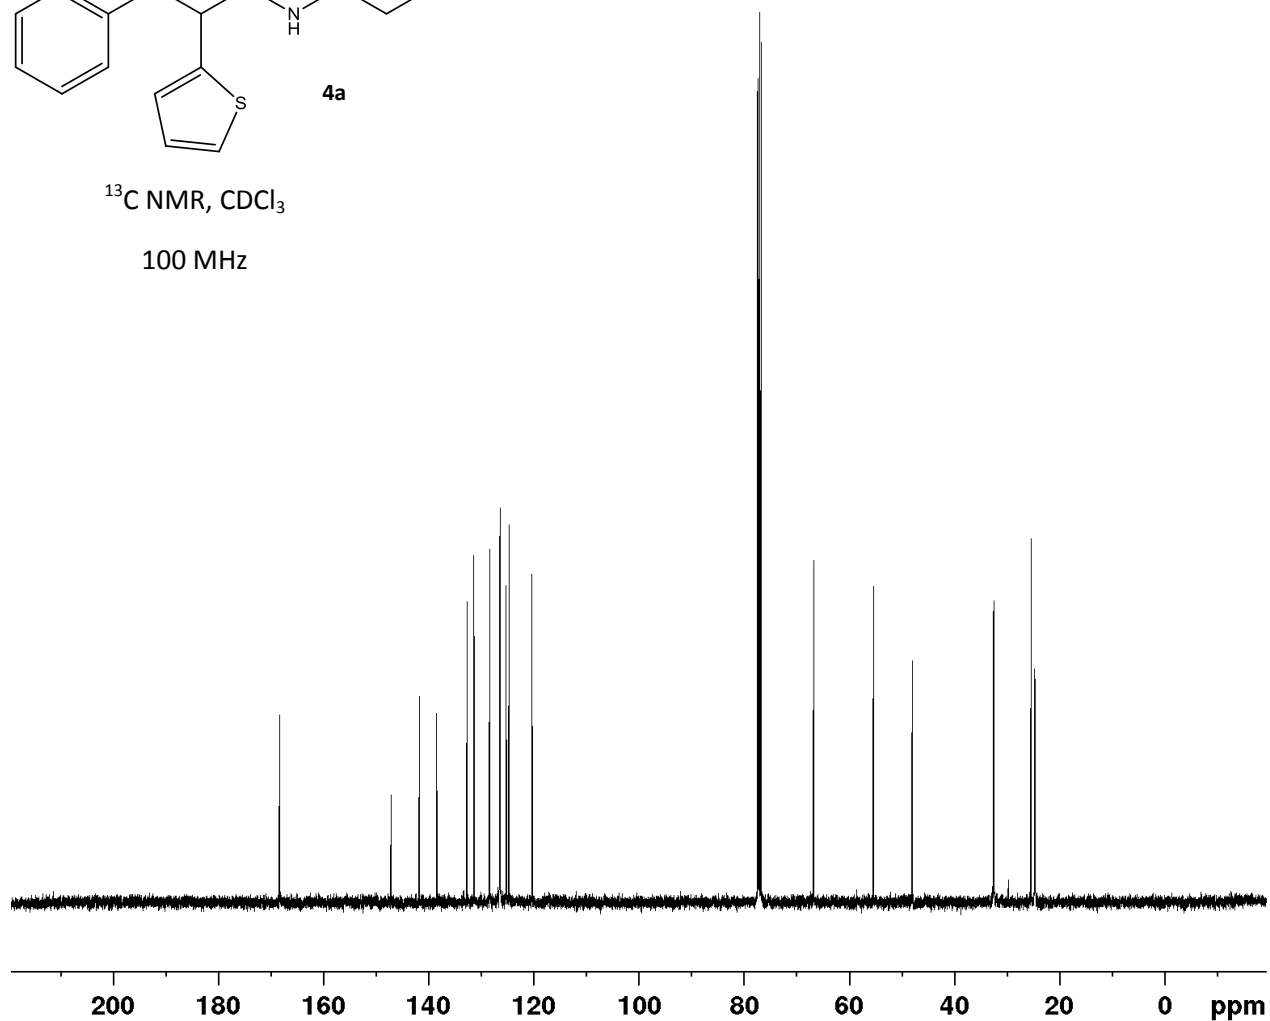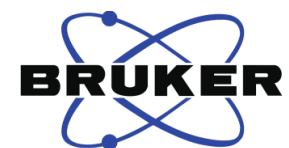

Current Data Parameters  
 NAME MM-2-26-2-F14-21  
 EXPNO 2  
 PROCNO 1

F2 - Acquisition Parameters  
 Date\_ 20150904  
 Time 17.15  
 INSTRUM spect  
 PROBHD 5 mm PABBO BB/  
 PULPROG zgpg30  
 TD 65536  
 SOLVENT  $\text{CDCl}_3$   
 NS 256  
 DS 4  
 SWH 24038.461 Hz  
 FIDRES 0.366798 Hz  
 AQ 1.3631488 sec  
 RG 210.96  
 DW 20.800 usec  
 DE 10.00 usec  
 TE 294.5 K  
 D1 2.00000000 sec  
 D11 0.03000000 sec  
 TDO 1

===== CHANNEL f1 =====  
 SFO1 100.6278588 MHz  
 NUC1 13C  
 P1 10.00 usec  
 PLW1 48.20000076 W

===== CHANNEL f2 =====  
 SFO2 400.1516006 MHz  
 NUC2 1H  
 CPDPRG[2] waltz16  
 PCPD2 90.00 usec  
 PLW2 9.80000019 W  
 PLW12 0.27221999 W  
 PLW13 0.22050001 W

F2 - Processing parameters  
 SI 32768  
 SF 100.6177926 MHz  
 WDW EM  
 SSB 0  
 LB 1.00 Hz  
 GB 0  
 PC 1.40

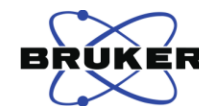

Current Data Parameters  
NAME AF 1-10-1 R15-34  
EXPNO 2  
PROCNO 1

F2 - Acquisition Parameters  
Date\_ 20160527  
Time 13.16  
INSTRUM spect  
PROBHD 5 mm PABBO BB/  
PULPROG zg30  
TD 65536  
SOLVENT CDCl3  
NS 16  
DS 2  
SWH 8012.820 Hz  
FIDRES 0.122266 Hz  
AQ 4.0894465 sec  
RG 66.61  
DW 62.400 usec  
DE 6.50 usec  
TE 294.0 K  
D1 1.00000000 sec  
TD0 1

===== CHANNEL f1 =====  
SFO1 400.1524711 MHz  
NUC1 1H  
P1 15.00 usec  
PLW1 9.80000019 W

F2 - Processing parameters  
SI 65536  
SF 400.1500102 MHz  
WDW EM  
SSB 0  
LB 0.30 Hz  
GB 0  
PC 1.00

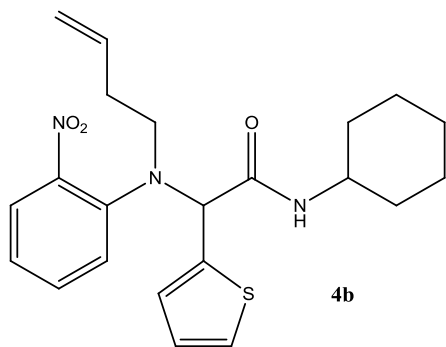

$^1\text{H}$  NMR,  $\text{CDCl}_3$

400 MHz

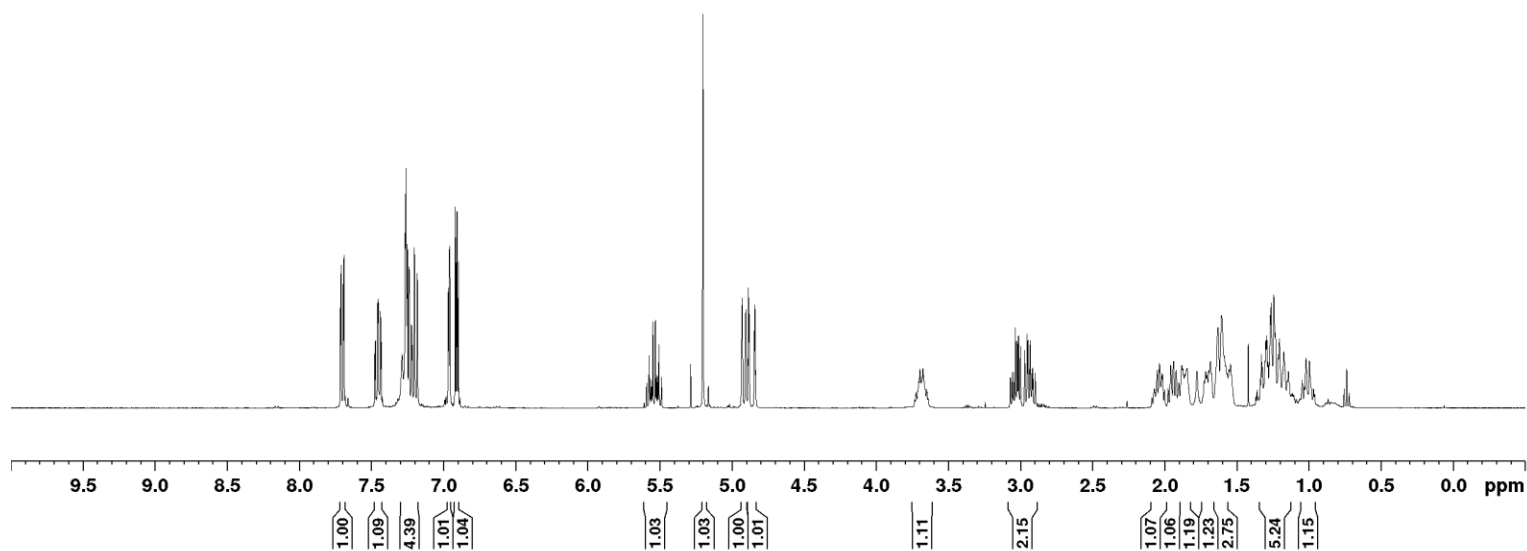

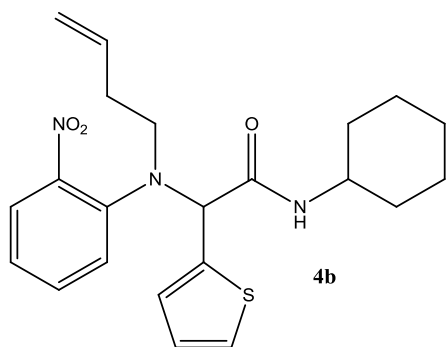

$^{13}\text{C}$  NMR,  $\text{CDCl}_3$

100 MHz

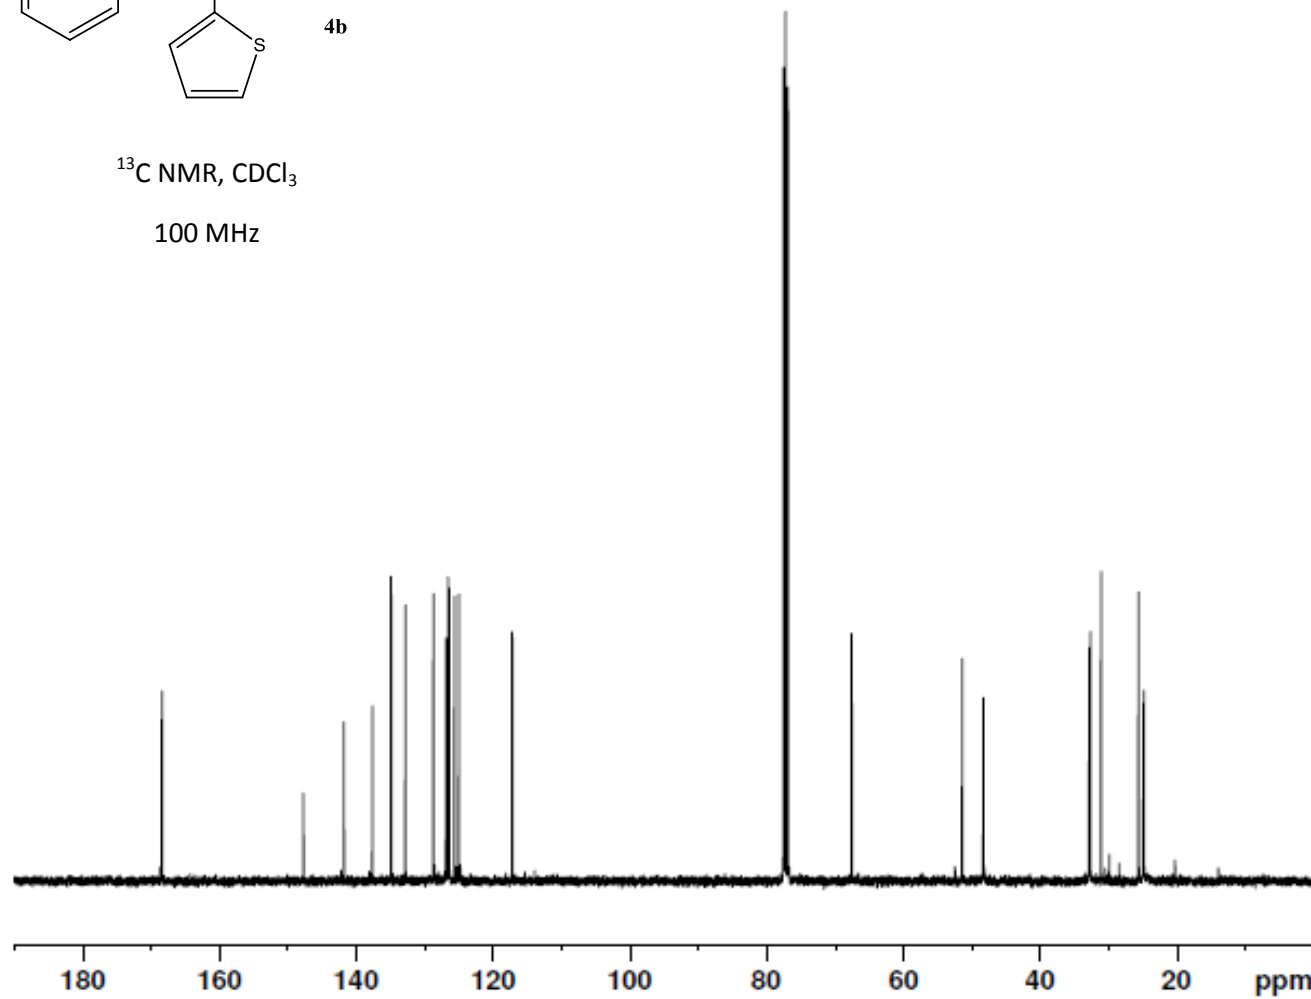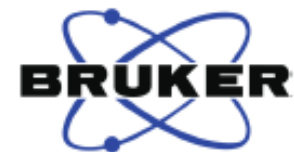

Current Data Parameters  
 NAME AF 1-10-1 pure pdct  
 EXPNO 1  
 PROCNO 1

F2 - Acquisition Parameters  
 Date\_ 20160529  
 Time 13.33  
 INSTRUM spect  
 PROBHD 5 mm PABBO BB/  
 PULPROG zgpg30  
 TD 65536  
 SOLVENT  $\text{CDCl}_3$   
 NS 512  
 DS 4  
 SWH 24038.461 Hz  
 FIDRES 0.366798 Hz  
 AQ 1.3631488 sec  
 RG 210.96  
 DW 20.800 usec  
 DE 10.00 usec  
 TE 295.5 K  
 D1 2.00000000 sec  
 D11 0.03000000 sec  
 TDO 1

==== CHANNEL f1 =====  
 SFO1 100.6278588 MHz  
 NUC1 13C  
 P1 10.00 usec  
 PLW1 48.20000076 W

==== CHANNEL f2 =====  
 SFO2 400.1516006 MHz  
 NUC2 1H  
 CPDPRG[2] waltz16  
 PCPD2 90.00 usec  
 PLW2 9.80000019 W  
 PLW12 0.27221999 W  
 PLW13 0.22050001 W

F2 - Processing parameters  
 SI 32768  
 SF 100.6177865 MHz  
 WDW EM  
 SSB 0  
 LB 1.00 Hz  
 GB 0  
 PC 1.40
